# Supplementary material for: Organocatalytic asymmetric synthesis of multifunctionalized α-carboline-spirooxindole hybrids that suppressed proliferation in colorectal cancer cells
Source: Royal Society of Chemistry journal article supplement (doi:10.1039/d1qo01785c), 2022-01-01
Supplement: d1qo01785c1.pdf [file d1qo01785c1.pdf]

## Supporting Information

### Organocatalytic asymmetric synthesis of multifunctionalized $\alpha$ -carboline-spirooxindole hybrids that suppressed proliferation in colorectal cancer cell lines

Xiang-Hong He,<sup>a</sup> Xue-Ju Fu,<sup>a</sup> Gu Zhan,<sup>\*a</sup> Nan Zhang,<sup>ab</sup> Xiang Li,<sup>a</sup>

Hong-Ping Zhu,<sup>ac</sup> Cheng Peng,<sup>a</sup> Gu He<sup>\*b</sup>, and Bo Han<sup>\*a</sup>

<sup>a</sup> State Key Laboratory of Southwestern Chinese Medicine Resources, Hospital of Chengdu University of Traditional Chinese Medicine, School of Pharmacy, Chengdu University of Traditional Chinese Medicine, Chengdu 611137, P.R. China. E-mail: hanbo@cdutcm.edu.cn

<sup>b</sup> State Key Laboratory of Biotherapy and Department of Pharmacy, West China Hospital, Sichuan University, Chengdu, 610041, China. E-mail: hegu@scu.edu.cn

<sup>c</sup> Antibiotics Research and Re-evaluation Key Laboratory of Sichuan Province, Sichuan Industrial Institute of Antibiotics, Chengdu University, Chengdu 610052, China.

### Table of Contents

|                                                          |    |
|----------------------------------------------------------|----|
| 1. General methods and materials .....                   | 2  |
| 2. General procedure for the synthesis of <b>4</b> ..... | 3  |
| 3. X-ray crystal structure of <b>4a</b> .....            | 19 |
| 4. NMR and HPLC spectra .....                            | 20 |
| 5. Experimental procedures and results of bioassays..... | 75 |

## 1. General methods and materials

Nuclear magnetic resonance (NMR) spectra were recorded in DMSO-*d*<sub>6</sub> or CDCl<sub>3</sub> on Bruker 600, 700 MHz, or JEOL 600 NMR instrument (at 600 or 700 MHz for <sup>1</sup>H, and at 150, or 175 MHz for <sup>13</sup>C). The <sup>1</sup>H NMR chemical shifts are reported in ppm, and are referenced using residual protium in the NMR solvent (CDCl<sub>3</sub>: δ = 7.26 ppm (CHCl<sub>3</sub>), DMSO-*d*<sub>6</sub>: δ = 2.49 ppm (DMSO)). The <sup>13</sup>C NMR chemical shifts were given using DMSO-*d*<sub>6</sub> or CDCl<sub>3</sub> as the internal standard (DMSO-*d*<sub>6</sub>: δ = 39.52 ppm; CDCl<sub>3</sub>: δ = 77.00 ppm). Enantiomeric ratio (er) was determined by comparing HPLC analyses of products on chiral columns with results obtained using authentic racemates. Enantiomeric ratio (er) was determined by comparing HPLC analyses of products on chiral columns with results obtained using authentic racemates. The following Daicel Chiralpak columns were used: IA (250 x 4.6 mm), IC (250 x 4.6 mm) or IE (250 x 4.6 mm). UV detection was performed at 254 nm. Optical rotation values were measured with instruments operating at λ = 589 nm, corresponding to the sodium D line at 25 °C. High-resolution mass spectra (HRMS) were obtained using Agilent P/N G1969-90010. High-resolution mass spectra were reported for the molecular ion [M+H]<sup>+</sup> or [M+Na]<sup>+</sup>. Melting points were recorded on BUCHI Melting Point M-565 instrument. X-ray diffraction experiment was carried out on an Agilent Gemini and the data obtained were deposited at the Cambridge Crystallographic Data Centre. UV detection was performed at 254 nm. TLC was performed on glass-backed silica plates; products were visualized using UV light. Column chromatography was performed on silica gel (400–500 mesh) using an eluent of ethyl acetate and petroleum ether. All reagents and solvents were obtained from commercial sources and used without further purification. isatin-derived MBH carbonates **1**<sup>[1]</sup>, indolin-2-imines **2**<sup>[2]</sup> and catalysts<sup>[3]</sup> were prepared according to the literature procedures.

---

### Reference:

1. J. Peng, X. Huang, H.-L. Cui, Y. -C. Chen, Organocatalytic and Electrophilic Approach to Oxindoles with C3-Quaternary Stereocenters. *Org. Lett.*, 2010, **12**, 4260.
2. (a) K. S, K. C. K. Swamy, Transition-Metal-Free, Brønsted Acid-Mediated Cascade Sequence in the Reaction of Propargyl Alcohols with Sulfonamido-indoles/-indolines: Highly Substituted δ-and α-Carbolines. *J. Org. Chem.*, 2018, **83**, 15043; (b) H. Liu, A. M. Z. Slawin, A. D. Smith, Isothiourea-Catalyzed Enantioselective Synthesis of Tetrahydro-α-carbolinones, *Org. Lett.*, 2020, **22**, 1301.
3. H. Waldmann, V. Khedkar, H. Dückert, M. Schürmann, I. Oppel, K. Kumar, Asymmetric Synthesis of Natural Product Inspired Tricyclic Benzopyrones by an Organocatalyzed Annulation Reaction. *Angew. Chem. Int. Ed.*, 2008, **47**, 6869.

## 2. General procedure for the synthesis of 4

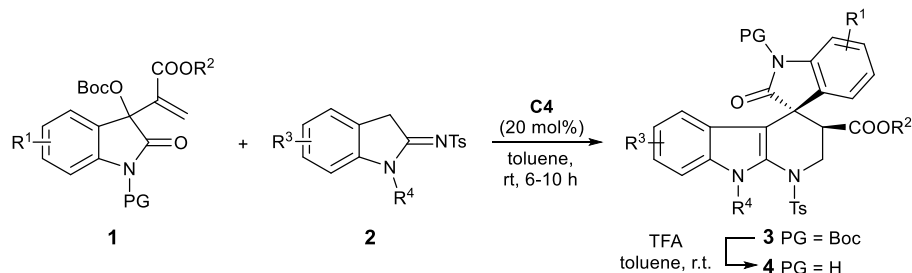

A mixture of **1** (0.1 mmol) and **2** (0.12 mmol, 1.2 equiv.) was added **C4** (0.02 mmol, 20 mol%) in toluene (1.0 mL) at room temperature for 6-10 hours until the complete consumption of **1** (monitored by TLC). The reaction mixture was concentrated and the residue was purified by flash chromatography on silica gel (petroleum ether /ethyl acetate = 15:1 to 10:1) to give the protected spirooxindole- $\alpha$ -carboline derivative **3**. To a solution of **3** in toluene (1.0 mL) was added TEA (20.0 mg) at room temperature for about 1 h. After the reaction was completed (monitored by TLC), the reaction mixture was concentrated and the residue was purified by flash chromatography on silica gel (petroleum ether /ethyl acetate = 5:1 to 3:1) to give the deprotected spirooxindole- $\alpha$ -carboline derivative **4**, which was dried under vacuum and further analyzed by  $^1\text{H}$  NMR,  $^{13}\text{C}$  NMR, HPLC and high-resolution mass spectrometry.

### 1-(tert-butyl) 3'-methyl (3*S*,3'*R*)-9'-methyl-2-oxo-1'-tosyl-1',2',3',9'-tetrahydrospiro[indoline-3,4'-pyrido[2,3-*b*]indole]-1,3'-dicarboxylate 3a:

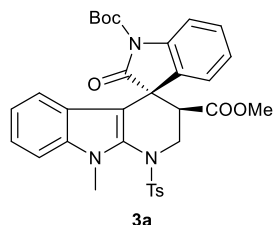

A mixture of **1a** (43.4 mg, 0.1 mmol) and **2a** (36.1 mg, 0.12 mmol) was added **C4** (6.5 mg, 0.02 mmol, 20 mol%) in toluene (1.0 mL) at room temperature for 8 hours. After completion, purification by flash chromatography on silica gel (petroleum ether/EtOAc = 12/1) gave the protected product **3a**: 52.2 mg, as a white solid, 85% yield, 93:7 er, >20:1 dr; m.p. 190–192 °C,  $[\alpha]_{\text{D}}^{25} = 89.6$  (c 0.67,  $\text{CH}_2\text{Cl}_2$ ). The ee was determined by

HPLC (Chiralpak IE, 2-propanol/*n*-hexane = 30/70, flow rate 1.0 mL/min,  $\lambda = 254$  nm,  $t_{\text{major}} = 22.73$  min,  $t_{\text{minor}} = 20.54$  min).  $^1\text{H}$  NMR (700 MHz,  $\text{CDCl}_3$ ):  $\delta = 7.90$  (d,  $J = 8.4$  Hz, 1H), 7.64 (d,  $J = 8.4$  Hz, 2H), 7.35 (d,  $J = 8.0$  Hz, 2H), 7.30 (d,  $J = 7.7$  Hz, 1H), 7.25–7.23 (m, 1H), 7.16–7.14 (m, 1H), 6.88–6.86 (m, 1H), 6.83–6.82 (m, 1H), 6.83–6.82 (m, 1H), 6.62 (d,  $J = 8.4$  Hz, 1H), 4.51 (dd,  $J_1 = 14.7$  Hz,  $J_2 = 3.5$  Hz, 1H), 3.89–3.85 (m, 4H), 3.15 (s, 3H), 3.00 (dd,  $J_1 = 14.7$  Hz,  $J_2 = 3.5$  Hz, 1H), 2.45 (s, 3H), 1.64 (s, 9H) ppm;  $^{13}\text{C}\{^1\text{H}\}$  NMR (150 MHz,  $\text{CDCl}_3$ ):  $\delta = 175.27, 169.48, 149.34, 145.20, 139.32, 136.71, 134.25, 133.80, 130.47$  (2C), 129.66, 128.94 (2C), 128.30, 124.69, 123.70, 123.36, 122.42, 120.50, 117.76, 114.82, 110.07, 101.89, 84.32, 51.64, 49.88, 46.96, 44.85, 32.90, 28.07, 21.75 ppm. HRMS (ESI-TOF) Calcd. For  $\text{C}_{33}\text{H}_{33}\text{N}_3\text{O}_7\text{S}$   $[\text{M}+\text{Na}]^+$ : 638.1937; found 638.1936.

**methyl (3*S*,3'*R*)-9'-methyl-2-oxo-1'-tosyl-1',2',3',9'-tetrahydrospiro[indoline-3,4'-pyrido[2,3-*b*]indole]-3'-carboxylate (4a):**

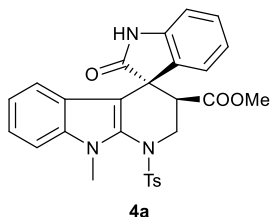

A mixture of **1a** (43.4 mg, 0.1 mmol) and **2a** (36.1 mg, 0.12 mmol) was added **C4** (6.5 mg, 20 mol%) in toluene (1.0 mL) at room temperature for 8 hours. After completion, purification by flash chromatography on silica gel (petroleum ether/EtOAc = 12/1) gave the protected product **3a**. To a solution of **3a** in toluene (1.0 mL) was added TFA (20.0 mg) at room temperature for 1 hour. After completion, purification by flash chromatography on silica gel

(petroleum ether/EtOAc = 5/1) gave the deprotected product **4a**: 43.5 mg, as a white solid, 84% yield, 92:8 er, >20:1 dr; m.p. 259–261 °C,  $[\alpha]_D^{25} = 135.8$  (c 0.75, CH<sub>2</sub>Cl<sub>2</sub>). The ee was determined by HPLC (Chiralpak IA, 2-propanol/*n*-hexane = 30/70, flow rate 1.0 mL/min,  $\lambda = 254$  nm,  $t_{\text{major}} = 32.02$  min,  $t_{\text{minor}} = 19.83$  min). **<sup>1</sup>H NMR (600 MHz, DMSO-*d*<sub>6</sub>)**:  $\delta = 10.79$  (s, 1H), 7.86 (d,  $J = 8.4$  Hz, 2H), 7.50 (d,  $J = 7.8$  Hz, 2H), 7.43 (d,  $J = 8.4$  Hz, 1H), 7.17 (t,  $J = 7.2$  Hz, 1H), 7.11 (t,  $J = 7.2$  Hz, 1H), 6.95 (t,  $J = 7.2$  Hz, 2H), 6.84 (t,  $J = 7.2$  Hz, 1H), 6.73 (t,  $J = 7.2$  Hz, 1H), 6.66 (d,  $J = 7.8$  Hz, 1H), 4.17 (dd,  $J_1 = 14.4$  Hz,  $J_2 = 3.6$  Hz, 1H), 3.98 (dd,  $J_1 = 15.0$  Hz,  $J_2 = 12.0$  Hz, 1H), 3.76 (s, 3H), 3.38 (dd,  $J_1 = 12.0$  Hz,  $J_2 = 3.6$  Hz, 1H), 3.12 (s, 3H), 2.44 (s, 3H) ppm; **<sup>13</sup>C{<sup>1</sup>H} NMR (150 MHz, DMSO-*d*<sub>6</sub>)**:  $\delta = 178.51, 170.00, 145.56, 142.49, 136.26, 134.58, 133.88, 131.34, 130.93$  (2C), 129.21, 128.53 (2C), 124.88, 123.54, 122.42, 121.98, 120.35, 117.74, 110.74, 109.74, 102.43, 51.79, 49.70, 47.02, 44.79, 32.46, 21.68 ppm. HRMS (ESI-TOF) Calcd. For C<sub>28</sub>H<sub>25</sub>N<sub>3</sub>O<sub>5</sub>S [M+Na]<sup>+</sup>: 538.1413; found 538.1411.

**methyl (3*S*,3'*R*)-5-fluoro-9'-methyl-2-oxo-1'-tosyl-1',2',3',9'-tetrahydrospiro[indoline-3,4'-pyrido[2,3-*b*]indole]-3'-carboxylate (4b):**

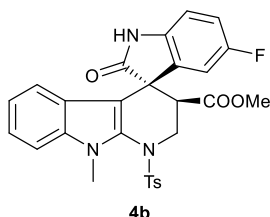

A mixture of **1b** (45.1 mg, 0.1 mmol) and **2a** (36.1 mg, 0.12 mmol) was added **C4** (6.5 mg, 20 mol%) in toluene (1.0 mL) at room temperature for 8 hours. After completion, purification by flash chromatography on silica gel (petroleum ether/EtOAc = 12/1) gave the protected product **3b**. To a solution of **3b** in toluene (1.0 mL) was added TFA (20.0 mg) at room temperature for 1 hour. After completion, purification by flash chromatography on silica gel

(petroleum ether/EtOAc = 5/1) gave the deprotected product **4b**: 40.7 mg, as a white solid, 76% yield, 90:10 er, >20:1 dr; m.p. 234–235 °C,  $[\alpha]_D^{25} = 109.4$  (c 0.65, CH<sub>2</sub>Cl<sub>2</sub>). The ee was determined by HPLC (Chiralpak IA, 2-propanol/*n*-hexane = 30/70, flow rate 1.0 mL/min,  $\lambda = 254$  nm,  $t_{\text{major}} = 23.21$  min,  $t_{\text{minor}} = 8.54$  min). **<sup>1</sup>H NMR (700 MHz, DMSO-*d*<sub>6</sub>)**:  $\delta = 10.82$  (s, 1H), 7.87 (d,  $J = 7.7$  Hz, 2H), 7.51 (d,  $J = 7.8$  Hz, 2H), 7.45 (d,  $J = 8.4$  Hz, 1H), 7.15–7.12 (m, 1H), 7.03–6.97 (m, 2H), 6.95–6.94 (m, 1H), 6.89–6.86 (m, 1H), 6.68–6.65 (m, 1H), 4.15 (dd,  $J_1 = 14.7$  Hz,  $J_2 = 3.5$  Hz, 1H),

3.98 (dd,  $J_1 = 14.7$  Hz,  $J_2 = 12.6$  Hz, 1H), 3.77 (s, 3H), 3.38 (dd,  $J_1 = 12.6$  Hz,  $J_2 = 3.5$  Hz, 1H), 3.18 (s, 3H), 2.45 (s, 3H) ppm;  $^{13}\text{C}\{^1\text{H}\}$  NMR (150 MHz, DMSO- $d_6$ ):  $\delta = 177.99, 169.42, 157.79$  (d,  $J_{CF} = 235.4$  Hz), 145.12, 138.31, 135.80, 134.08, 133.60, 132.55 (d,  $J = 8.1$  Hz), 130.47 (2C), 128.06 (2C), 122.97, 122.01, 120.01, 117.04, 115.07 (d,  $J = 23.3$  Hz), 112.44 (d,  $J = 24.7$  Hz), 110.37, 110.04 (d,  $J = 7.7$  Hz), 101.39, 51.47, 49.73, 46.26, 44.21, 32.03, 21.21 ppm;  $^{19}\text{F}$  NMR (658 MHz, DMSO- $d_6$ ):  $\delta = -121.57$  ppm. HRMS (ESI-TOF) Calcd. For  $\text{C}_{28}\text{H}_{24}\text{FN}_3\text{O}_5\text{S}$   $[\text{M}+\text{Na}]^+$ : 556.1318; found 556.1316.

**methyl (3*S*,3'*R*)-5-chloro-9'-methyl-2-oxo-1'-tosyl-1',2',3',9'-tetrahydrospiro[indoline-3,4'-pyrido[2,3-*b*]indole]-3'-carboxylate (4c):**

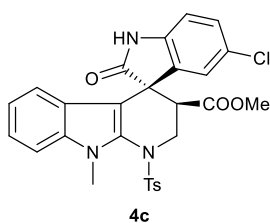

A mixture of **1c** (46.8 mg, 0.1 mmol) and **2a** (36.1 mg, 0.12 mmol) was added **C4** (6.5 mg, 20 mol%) in toluene (1.0 mL) at room temperature for 8 hours. After completion, purification by flash chromatography on silica gel (petroleum ether/EtOAc = 12/1) gave the protected product **3c**. To a solution of **3c** in toluene (1.0 mL) was added TFA (20.0 mg) at room temperature for 1 hour. After completion, purification by flash chromatography on silica gel (petroleum ether/EtOAc = 5/1) gave the deprotected product **4c**: 43.6 mg, as a white solid, 79% yield, 89:11 er, >20:1 dr; m.p. 204–206 °C,  $[\alpha]_{\text{D}}^{25} = 85.6$  (c 0.82,  $\text{CH}_2\text{Cl}_2$ ). The ee was determined by HPLC (Chiralpak IA, 2-propanol/*n*-hexane = 30/70, flow rate 1.0 mL/min,  $\lambda = 254$  nm,  $t_{\text{major}} = 23.06$  min,  $t_{\text{minor}} = 7.95$  min).  $^1\text{H}$  NMR (700 MHz, DMSO- $d_6$ ):  $\delta = 10.86$  (s, 1H), 7.79 (d,  $J = 8.4$  Hz, 2H), 7.43 (d,  $J = 8.4$  Hz, 2H), 7.39 (d,  $J = 8.4$  Hz, 1H), 7.16 (dd,  $J_1 = 8.4$  Hz,  $J_2 = 2.1$  Hz, 1H), 7.08–7.05 (m, 2H), 6.89 (d,  $J = 8.4$  Hz, 1H); 6.81 (t,  $J = 8.4$  Hz, 1H), 6.57 (d,  $J = 7.7$  Hz, 1H), 4.08 (dd,  $J_1 = 14.7$  Hz,  $J_2 = 3.5$  Hz, 1H), 4.02–3.98 (m, 1H), 3.70 (s, 3H), 3.31–3.28 (m, 1H), 3.12 (s, 3H), 2.37 (s, 3H) ppm;  $^{13}\text{C}\{^1\text{H}\}$  NMR (175 MHz, DMSO- $d_6$ ):  $\delta = 178.24, 169.86, 145.57, 141.49, 136.27, 134.57, 134.19, 133.36, 130.93$  (2C), 129.20, 128.50 (2C), 126.09, 125.06, 123.40, 122.49, 120.52, 117.44, 111.20, 110.88, 101.68, 51.98, 49.98, 46.74, 44.72, 32.52, 21.67 ppm. HRMS (ESI-TOF) Calcd. For  $\text{C}_{28}\text{H}_{24}\text{ClN}_3\text{O}_5\text{S}$   $[\text{M}+\text{Na}]^+$ : 572.1023; found 572.1023.

**methyl (3*S*,3'*R*)-5-bromo-9'-methyl-2-oxo-1'-tosyl-1',2',3',9'-tetrahydrospiro[indoline-3,4'-pyrido[2,3-*b*]indole]-3'-carboxylate (4d):**

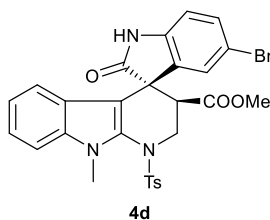

A mixture of **1d** (51.2 mg, 0.1 mmol) and **2a** (36.1 mg, 0.12 mmol) was added **C4** (6.5 mg, 20 mol%) in toluene (1.0 mL) at room temperature for 8 hours. After completion, purification by flash chromatography on silica gel (petroleum ether/EtOAc = 12/1) gave the protected product **3d**. To a solution of **3d** in toluene (1.0 mL) was added TFA (20.0 mg) at room temperature for

1 hour. After completion, purification by flash chromatography on silica gel (petroleum ether/EtOAc = 5/1) gave the deprotected product **4d**: 45.8 mg, as a white solid, 77% yield, 90:10 er, >20:1 dr; m.p. 263–264 °C,  $[\alpha]_{\text{D}}^{25} = 110.4$  (c 0.60, CH<sub>2</sub>Cl<sub>2</sub>). The ee was determined by HPLC (Chiralpak IE, 2-propanol/*n*-hexane = 30/70, flow rate 1.0 mL/min,  $\lambda = 254$  nm,  $t_{\text{major}} = 34.52$  min,  $t_{\text{minor}} = 19.52$  min). **<sup>1</sup>H NMR (600 MHz, *d*-DMSO)**:  $\delta = 10.94$  (s, 1H), 7.85 (d,  $J = 8.4$  Hz, 2H), 7.50 (d,  $J = 7.8$  Hz, 2H), 7.45 (d,  $J = 8.4$  Hz, 1H), 7.36 (dd,  $J_1 = 7.8$  Hz,  $J_2 = 1.8$  Hz, 1H), 7.22 (d,  $J = 2.4$  Hz, 1H), 7.13 (t,  $J = 7.8$  Hz, 1H), 6.91 (d,  $J = 8.4$  Hz, 1H), 6.87 (t,  $J = 7.8$  Hz, 1H), 6.63 (d,  $J = 7.8$  Hz, 1H), 4.14 (dd,  $J_1 = 15.0$  Hz,  $J_2 = 3.6$  Hz, 1H), 4.06 (dd,  $J_1 = 15.0$  Hz,  $J_2 = 12.0$  Hz, 1H), 3.76 (s, 3H), 3.37–3.34 (m, 1H), 3.18 (s, 3H), 2.44 (s, 3H) ppm; **<sup>13</sup>C{<sup>1</sup>H} NMR (150 MHz, DMSO-*d*<sub>6</sub>)**:  $\delta = 178.19, 169.92, 145.62, 141.96, 136.33, 134.66, 134.27, 133.79, 132.15, 130.99$  (2C), 128.55 (2C), 127.73, 123.47, 122.55, 120.60, 117.50, 113.89, 111.79, 110.96, 101.71, 52.05, 50.00, 46.80, 44.83, 32.59, 21.73 ppm. HRMS (ESI-TOF) Calcd. For C<sub>28</sub>H<sub>24</sub><sup>79</sup>BrN<sub>3</sub>O<sub>5</sub>S [M+Na]<sup>+</sup>: 616.0518; found 616.0518; Calcd. For C<sub>28</sub>H<sub>24</sub><sup>81</sup>BrN<sub>3</sub>O<sub>5</sub>S [M+Na]<sup>+</sup>: 618.0497; found 618.0502.

**methyl (3*S*,3'*R*)-5,9'-dimethyl-2-oxo-1'-tosyl-1',2',3',9'-tetrahydrospiro[indoline-3,4'-pyrido-[2,3-*b*]indole]-3'-carboxylate (4e):**

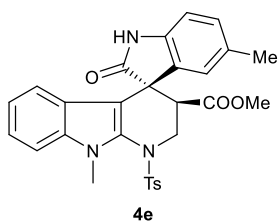

A mixture of **1e** (44.8 mg, 0.1 mmol) and **2a** (36.1 mg, 0.12 mmol) was added **C4** (6.5 mg, 20 mol%) in toluene (1.0 mL) at room temperature for 9 hours. After completion, purification by flash chromatography on silica gel (petroleum ether/EtOAc = 12/1) gave the protected product **3e**. To a solution of **3e** in toluene (1.0 mL) was added TFA (20.0 mg) at room temperature for 1 hour. After completion, purification by flash chromatography on silica gel (petroleum ether/EtOAc = 5/1) gave the deprotected product **4e**: 46.2 mg, as a white solid, 87% yield, 87:13 er, >20:1 dr; m.p. 247–249 °C,  $[\alpha]_{\text{D}}^{25} = 83.5$  (c 0.40, CH<sub>2</sub>Cl<sub>2</sub>). The ee was determined by HPLC (Chiralpak IA, 2-propanol/*n*-hexane = 30/70, flow rate 1.0 mL/min,  $\lambda = 254$  nm,  $t_{\text{major}} = 27.05$  min,  $t_{\text{minor}} = 13.82$  min). **<sup>1</sup>H NMR (700 MHz, DMSO-*d*<sub>6</sub>)**:  $\delta = 10.67$  (s, 1H), 7.85 (d,  $J = 8.4$  Hz, 2H), 7.49 (d,  $J = 8.4$  Hz, 2H), 7.42 (d,  $J = 8.4$  Hz, 1H), 7.12–7.09 (m, 1H), 6.97–6.95 (m, 1H), 6.85–6.83 (m, 2H), 6.82–6.79 (m, 1H), 6.67 (d,  $J = 8.4$  Hz, 1H), 4.16 (dd,  $J_1 = 14.7$  Hz,  $J_2 = 3.5$  Hz, 1H), 3.97 (dd,  $J_1 = 14.7$  Hz,  $J_2 = 12.6$  Hz, 1H), 3.75 (s, 3H), 3.36–3.35 (m, 1H), 3.13 (s, 3H), 2.43 (s, 3H), 2.03 (s, 3H) ppm; **<sup>13</sup>C{<sup>1</sup>H} NMR (175 MHz, DMSO-*d*<sub>6</sub>)**:  $\delta = 178.01, 169.56, 145.06, 139.58, 135.80, 134.15, 133.36, 130.93$  (2C), 130.45, 130.30, 129.00 (2C), 128.03, 124.84, 123.12, 121.92, 119.87, 117.37, 110.26, 109.01, 102.09, 51.33, 49.26, 46.58, 44.28, 32.03, 21.20, 20.49 ppm. HRMS (ESI-TOF) Calcd. For C<sub>29</sub>H<sub>27</sub>N<sub>3</sub>O<sub>5</sub>S [M+Na]<sup>+</sup>: 552.1569; found 552.1569.

**methyl (3*S*,3'*R*)-5-methoxy-9'-methyl-2-oxo-1'-tosyl-1',2',3',9'-tetrahydrospiro[indoline-3,4'-pyrido[2,3-*b*]indole]-3'-carboxylate (4f):**

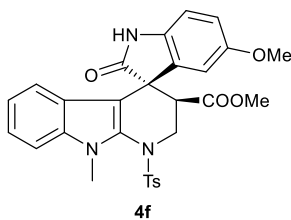

A mixture of **1f** (46.4 mg, 0.1 mmol) and **2a** (36.1 mg, 0.12 mmol) was added **C4** (6.5 mg, 20 mol%) in toluene (1.0 mL) at room temperature for 10 hours. After completion, purification by flash chromatography on silica gel (petroleum ether/EtOAc = 10/1) gave the protected product **3f**. To a solution of **3f** in toluene (1.0 mL) was added TFA (20.0 mg) at room temperature for 1 hour. After completion, purification by flash chromatography on silica gel (petroleum ether/EtOAc = 4/1) gave the deprotected product **4f**: 48.6 mg, as a white solid, 89% yield, 88:12 er, >20:1 dr; m.p. 226–227 °C,  $[\alpha]_{\text{D}}^{25} = 80.9$  (c 0.74, CH<sub>2</sub>Cl<sub>2</sub>). The ee was determined by HPLC (Chiralpak IA, 2-propanol/*n*-hexane = 30/70, flow rate 1.0 mL/min,  $\lambda = 254$  nm,  $t_{\text{major}} = 36.90$  min,  $t_{\text{minor}} = 10.92$  min). <sup>1</sup>H NMR (700 MHz, DMSO-*d*<sub>6</sub>):  $\delta = 10.59$  (s, 1H), 7.86 (d,  $J = 8.4$  Hz, 2H), 7.49 (d,  $J = 8.4$  Hz, 2H), 7.42 (d,  $J = 8.4$  Hz, 1H), 7.12–7.09 (m, 1H), 6.84 (t,  $J = 7.7$  Hz, 2H), 6.73 (dd,  $J_1 = 8.4$  Hz,  $J_2 = 2.8$  Hz, 1H), 6.68 (d,  $J = 7.7$  Hz, 1H), 6.59–6.58 (m 1H), 4.14–4.11 (m, 1H), 4.04–4.00 (m, 1H), 3.75 (s, 3H), 3.52 (s, 3H), 3.39–3.37 (m, 1H), 3.14 (s, 3H), 2.43 (s, 3H) ppm; <sup>13</sup>C{<sup>1</sup>H} NMR (175 MHz, DMSO-*d*<sub>6</sub>):  $\delta = 177.90, 169.56, 154.63, 145.04, 135.78, 135.36, 134.20, 133.42, 132.18, 130.44$  (2C), 128.03 (2C), 123.13, 121.89, 119.86, 117.33, 113.01, 111.81, 110.24, 109.53, 101.95, 55.40, 51.35, 49.67, 46.44, 44.32, 32.00, 21.20 ppm. HRMS (ESI-TOF) Calcd. For C<sub>29</sub>H<sub>27</sub>N<sub>3</sub>O<sub>6</sub>S [M+Na]<sup>+</sup>: 568.1518; found 568.1521.

**methyl (3*S*,3'*R*)-6-fluoro-9'-methyl-2-oxo-1'-tosyl-1',2',3',9'-tetrahydrospiro[indoline-3,4'-pyrido-[2,3-*b*]indole]-3'-carboxylate (4g):**

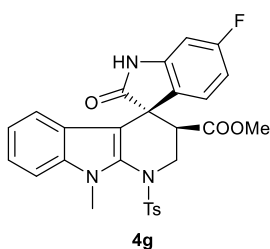

A mixture of **1g** (45.1 mg, 0.1 mmol) and **2a** (36.1 mg, 0.12 mmol) was added **C4** (6.5 mg, 20 mol%) in toluene (1.0 mL) at room temperature for 8 hours. After completion, purification by flash chromatography on silica gel (petroleum ether/EtOAc = 12/1) gave the protected product **3g**. To a solution of **3g** in toluene (1.0 mL) was added TFA (20.0 mg) at room temperature for 1 hour. After completion, purification by flash chromatography on silica gel (petroleum ether/EtOAc = 5/1) gave the deprotected product **4g**: 42.3 mg, as a white solid, 79% yield, 95:5 er, >20:1 dr; m.p. 237–239 °C,  $[\alpha]_{\text{D}}^{25} = 126.7$  (c 0.78, CH<sub>2</sub>Cl<sub>2</sub>). The ee was determined by HPLC (Chiralpak IA, 2-propanol/*n*-hexane = 30/70, flow rate 1.0 mL/min,  $\lambda = 254$  nm,  $t_{\text{major}} = 45.00$  min,  $t_{\text{minor}} = 29.55$  min). <sup>1</sup>H NMR (700 MHz, DMSO-*d*<sub>6</sub>):  $\delta = 10.96$  (s, 1H), 7.87–7.85 (m, 2H), 7.51 (d,  $J = 8.4$  Hz, 2H), 7.45 (d,  $J = 8.4$  Hz, 1H), 7.15–7.12 (m, 1H), 7.01 (dd,  $J_1 = 8.4$  Hz,  $J_2 = 5.6$  Hz, 1H), 6.89–6.87 (m, 1H), 6.78 (dd,  $J_1 = 9.1$  Hz,  $J_2 = 2.8$  Hz, 1H), 6.66–6.64 (m, 1H), 6.56–

6.53 (m, 1H), 4.17 (dd,  $J_1 = 14.7$  Hz,  $J_2 = 3.5$  Hz, 1H), 3.99 (dd,  $J_1 = 15.4$  Hz,  $J_2 = 12.6$  Hz, 1H), 3.76 (s, 3H), 3.34–3.33 (m, 1H), 3.18 (s, 3H), 2.45 (s, 3H) ppm;  $^{13}\text{C}\{^1\text{H}\}$  NMR (175 MHz, DMSO- $d_6$ ):  $\delta = 178.87, 169.90, 162.78$  (d,  $J = 241.2$  Hz), 145.59, 144.19 (d,  $J = 12.3$  Hz), 136.28, 134.52, 133.99, 130.94 (2C), 128.53 (2C), 127.24, 126.44 (d,  $J = 9.8$  Hz), 123.42, 122.49, 120.49, 117.55, 110.84, 108.08 (d,  $J = 22.1$  Hz), 102.12, 98.03 (d,  $J = 26.8$  Hz), 51.93, 49.32, 46.87, 44.83, 32.49, 21.67 ppm;  $^{19}\text{F}$  NMR (658 MHz, DMSO- $d_6$ ):  $\delta = -111.80$  ppm. HRMS (ESI-TOF) Calcd. For  $\text{C}_{28}\text{H}_{24}\text{FN}_3\text{O}_5\text{S}$   $[\text{M}+\text{Na}]^+$ : 556.1318; found 556.1318.

**methyl (3*S*,3'*R*)-6-chloro-9'-methyl-2-oxo-1'-tosyl-1',2',3',9'-tetrahydrospiro[indoline-3,4'-pyrido[2,3-*b*]indole]-3'-carboxylate (4h):**

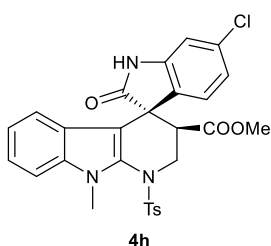

A mixture of **1h** (46.8 mg, 0.1 mmol) and **2a** (36.1 mg, 0.12 mmol) was added **C4** (6.5 mg, 20 mol%) in toluene (1.0 mL) at room temperature for 8 hours. After completion, purification by flash chromatography on silica gel (petroleum ether/EtOAc = 12/1) gave the protected product **3h**. To a solution of **3h** in toluene (1.0 mL) was added TFA (20.0 mg) at room temperature for 1 hour. After completion, purification by flash chromatography on silica gel (petroleum ether/EtOAc = 5/1) gave the deprotected product **4h**: 40.6 mg, as a white solid, 74% yield, 88:12 er, >20:1 dr; m.p. 233–234 °C,  $[\alpha]_{\text{D}}^{25} = 77.5$  (c 0.85,  $\text{CH}_2\text{Cl}_2$ ). The ee was determined by HPLC (Chiralpak IA, 2-propanol/*n*-hexane = 30/70, flow rate 1.0 mL/min,  $\lambda = 254$  nm,  $t_{\text{major}} = 47.06$  min,  $t_{\text{minor}} = 37.73$  min).  $^1\text{H}$  NMR (700 MHz, DMSO- $d_6$ ):  $\delta = 10.93$  (s, 1H), 7.82–7.80 (m, 2H), 7.46 (d,  $J = 7.0$  Hz, 2H), 7.40 (d,  $J = 8.4$  Hz, 1H), 7.09 (t,  $J = 7.7$  Hz, 1H), 6.97–6.96 (m, 1H), 6.94 (t,  $J = 9.1$  Hz, 1H), 6.85 (t,  $J_1 = 7.0$  Hz, 1H), 6.76–6.74 (m, 1H), 6.62 (d,  $J = 8.4$  Hz, 1H), 4.15–4.12 (m, 1H), 3.96–3.92 (m, 1H), 3.72 (s, 3H), 3.32–3.30 (m, 1H), 3.15 (s, 3H), 2.39 (s, 3H) ppm;  $^{13}\text{C}\{^1\text{H}\}$  NMR (175 MHz, DMSO- $d_6$ ):  $\delta = 178.49, 169.83, 145.62, 144.05, 136.26, 134.48, 134.02, 133.44, 130.94$  (2C), 130.28, 128.52 (2C), 126.38, 123.36, 122.53, 121.74, 120.58, 117.50, 110.87, 109.93, 101.80, 52.01, 49.42, 46.85, 44.73, 32.50, 21.67 ppm. HRMS (ESI-TOF) Calcd. For  $\text{C}_{28}\text{H}_{24}\text{ClN}_3\text{O}_5\text{S}$   $[\text{M}+\text{Na}]^+$ : 572.1023; found 572.1024.

**methyl (3*S*,3'*R*)-6-bromo-9'-methyl-2-oxo-1'-tosyl-1',2',3',9'-tetrahydrospiro[indoline-3,4'-pyrido[2,3-*b*]indole]-3'-carboxylate (4i):**

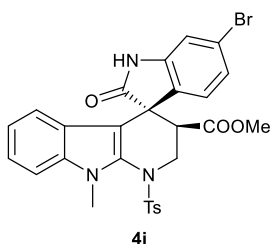

A mixture of **1i** (51.2 mg, 0.1 mmol) and **2a** (36.1 mg, 0.12 mmol) was added **C4** (6.5 mg, 20 mol%) in toluene (1.0 mL) at room temperature for 8 hours. After completion, purification by flash chromatography on silica gel (petroleum ether/EtOAc = 12/1) gave the protected product **3i**. To a solution of **3i** in toluene (1.0 mL) was added TFA (20.0 mg) at room temperature for



1 hour. After completion, purification by flash chromatography on silica gel (petroleum ether/EtOAc = 5/1) gave the deprotected product **4i**: 46.8 mg, as a white solid, 79% yield, 86:14 er, >20:1 dr; m.p. 234–236 °C,  $[\alpha]_{\text{D}}^{25} = 96.6$  (c 0.80, CH<sub>2</sub>Cl<sub>2</sub>). The ee was determined by HPLC (Chiralpak IA, 2-propanol/*n*-hexane = 30/70, flow rate 1.0 mL/min,  $\lambda = 254$  nm,  $t_{\text{major}} = 46.35$  min,  $t_{\text{minor}} = 40.26$  min). **<sup>1</sup>H NMR (700 MHz, DMSO-*d*<sub>6</sub>)**:  $\delta = 10.95$  (s, 1H), 7.86–7.84 (m, 2H), 7.50 (d,  $J = 8.4$  Hz, 2H), 7.44 (d,  $J = 8.4$  Hz, 1H), 7.14–7.12 (m, 1H), 7.10 (d,  $J = 2.1$  Hz, 1H), 6.96–6.92 (m, 1H), 6.90–6.88 (m, 1H), 6.90–6.88 (m, 1H), 6.65 (d,  $J = 8.4$  Hz, 1H), 4.17 (dd,  $J_1 = 14.7$  Hz,  $J_2 = 3.5$  Hz, 1H), 3.98 (dd,  $J_1 = 14.7$  Hz,  $J_2 = 4.9$  Hz, 1H), 3.76 (s, 3H), 3.36–3.35 (m, 1H), 3.19 (s, 3H), 2.44 (s, 3H) ppm; **<sup>13</sup>C{<sup>1</sup>H} NMR (175 MHz, DMSO-*d*<sub>6</sub>)**:  $\delta = 178.35, 169.81, 169.81, 145.62, 144.22, 136.25, 134.48, 134.02, 130.95$  (2C), 130.72, 128.53 (2C), 126.74, 124.63, 123.35, 122.53, 121.81, 120.59, 117.50, 112.65, 110.87, 101.72, 52.02, 49.48, 46.85, 44.66, 32.51, 21.67 ppm. HRMS (ESI-TOF) Calcd. For C<sub>28</sub>H<sub>24</sub><sup>79</sup>BrN<sub>3</sub>O<sub>5</sub>S [M+Na]<sup>+</sup>: 616.0518; found 616.0518; Calcd. For C<sub>28</sub>H<sub>24</sub><sup>81</sup>BrN<sub>3</sub>O<sub>5</sub>S [M+Na]<sup>+</sup>: 618.0497; found 618.0503.

**methyl (3*S*,3'*R*)-7,9'-dimethyl-2-oxo-1'-tosyl-1',2',3',9'-tetrahydrospiro[indoline-3,4'-pyrido-[2,3-*b*]indole]-3'-carboxylate (4j):**

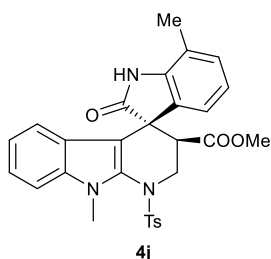

A mixture of **1j** (44.8 mg, 0.1 mmol) and **2a** (36.1 mg, 0.12 mmol) was added **C4** (6.5 mg, 20 mol%) in toluene (1.0 mL) at room temperature for 8 hours. After completion, purification by flash chromatography on silica gel (petroleum ether/EtOAc = 12/1) gave the protected product **3j**. To a solution of **3j** in toluene (1.0 mL) was added TFA (20.0 mg) at room temperature for 1 hour. After completion, purification by flash chromatography on silica gel (petroleum ether/EtOAc = 5/1) gave the deprotected product **4j**: 47.6 mg, as a white solid, 90% yield, 96:4 er, >20:1 dr; m.p. 260–261 °C,  $[\alpha]_{\text{D}}^{25} = 129.4$  (c 0.68, CH<sub>2</sub>Cl<sub>2</sub>). The ee was determined by HPLC (Chiralpak IA, 2-propanol/*n*-hexane = 30/70, flow rate 1.0 mL/min,  $\lambda = 254$  nm,  $t_{\text{major}} = 20.04$  min,  $t_{\text{minor}} = 16.93$  min). **<sup>1</sup>H NMR (700 MHz, DMSO-*d*<sub>6</sub>)**:  $\delta = 10.82$  (s, 1H), 7.88–7.86 (m, 2H), 7.51–7.49 (m, 2H), 7.41 (d,  $J = 8.4$  Hz, 1H), 7.11–7.09 (m, 1H), 6.98 (d,  $J = 7.7$  Hz, 1H), 6.83 (t,  $J = 7.7$  Hz 1H), 6.75 (d,  $J = 7.0$  Hz 1H), 6.64–6.62 (m, 2H), 4.13 (dd,  $J_1 = 14.7$  Hz,  $J_2 = 3.5$  Hz, 1H), 3.93 (dd,  $J_1 = 14.7$  Hz,  $J_2 = 11.9$  Hz, 1H), 3.74 (s, 3H), 3.40–3.39 (m, 1H), 3.09 (s, 3H), 2.43 (s, 3H), 2.29 (s, 3H) ppm; **<sup>13</sup>C{<sup>1</sup>H} NMR (175 MHz, DMSO-*d*<sub>6</sub>)**:  $\delta = 179.08, 170.01, 145.56, 141.05, 136.23, 134.60, 133.79, 130.96$  (2C), 130.94, 130.33, 128.52 (2C), 123.59, 122.40, 122.13, 121.90, 120.35, 119.05, 117.86, 110.68, 102.55, 51.68, 49.94, 46.97, 45.00, 32.39, 21.66, 16.99 ppm. HRMS (ESI-TOF) Calcd. For C<sub>29</sub>H<sub>27</sub>N<sub>3</sub>O<sub>5</sub>S [M+Na]<sup>+</sup>: 552.1569; found 552.1569.

**methyl (3*S*,3'*R*)-9'-methyl-5-nitro-2-oxo-1'-tosyl-1',2',3',9'-tetrahydrospiro[indoline-3,4'-pyrido[2,3-*b*]indole]-3'-carboxylate (4k):**

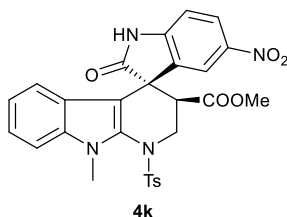

A mixture of **1k** (47.8 mg, 0.1 mmol) and **2a** (36.1 mg, 0.12 mmol) was added **C4** (6.5 mg, 20 mol%) in toluene (1.0 mL) at room temperature for 6 hours. After completion, purification by flash chromatography on silica gel (petroleum ether/EtOAc = 8/1) gave the protected product **3k**. To a solution of **3k** in toluene (1.0 mL) was added TFA (20.0 mg) at room temperature

for 1 hour. After completion, purification by flash chromatography on silica gel (petroleum ether/EtOAc = 3/1) gave the deprotected product **4k**: 42.5 mg, as a white solid, 76% yield, 88:12 er, >20:1 dr; m.p. 257–259 °C,  $[\alpha]_D^{25} = 89.4$  (c 0.69, CH<sub>2</sub>Cl<sub>2</sub>). The ee was determined by HPLC (Chiralpak IC, 2-propanol/*n*-hexane = 30/70, flow rate 1.0 mL/min,  $\lambda = 254$  nm,  $t_{\text{major}} = 32.62$  min,  $t_{\text{minor}} = 45.30$  min). <sup>1</sup>H NMR (600 MHz, CDCl<sub>3</sub>):  $\delta = 9.27$  (s, 1H), 8.12–8.10 (m, 1H), 7.80–7.77 (m, 2H), 7.69 (d,  $J = 1.8$  Hz, 1H), 7.41–7.39 (m, 2H), 7.34 (d,  $J = 8.4$  Hz, 1H), 7.34 (t,  $J = 7.2$  Hz, 1H), 6.99 (d,  $J = 8.4$  Hz, 1H), 6.83 (t,  $J = 7.8$  Hz, 1H), 6.67 (d,  $J = 7.8$  Hz, 1H), 4.50 (dd,  $J_1 = 15.0$  Hz,  $J_2 = 3.6$  Hz, 1H), 3.91 (s, 3H), 3.89–3.86 (m, 1H), 3.38 (dd,  $J_1 = 12.6$  Hz,  $J_2 = 3.6$  Hz, 1H), 3.28 (s, 3H), 2.48 (s, 3H) ppm; <sup>13</sup>C{<sup>1</sup>H} NMR (150 MHz, CDCl<sub>3</sub>):  $\delta = 179.73, 169.35, 146.67, 145.55, 143.47, 136.66, 134.37, 134.16, 132.41, 130.53$  (2C), 128.50 (2C), 126.14, 123.01, 122.87, 120.84, 120.09, 117.27, 110.48, 109.69, 99.93, 52.16, 49.88, 46.95, 44.53, 32.88, 21.94 ppm. HRMS (ESI-TOF) Calcd. For C<sub>28</sub>H<sub>24</sub>N<sub>4</sub>O<sub>7</sub>S [M+Na]<sup>+</sup>: 583.1263; found 583.1262.

**methyl (3*S*,3'*R*)-6'-fluoro-9'-methyl-2-oxo-1'-tosyl-1',2',3',9'-tetrahydrospiro[indoline-3,4'-pyrido[2,3-*b*]indole]-3'-carboxylate (4l):**

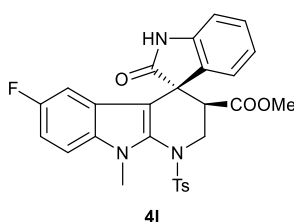

A mixture of **1a** (43.4 mg, 0.1 mmol) and **2b** (38.2 mg, 0.12 mmol) was added **C4** (6.5 mg, 20 mol%) in toluene (1.0 mL) at room temperature for 8 hours. After completion, purification by flash chromatography on silica gel (petroleum ether/EtOAc = 12/1) gave the protected product **3l**. To a solution of **3l** in toluene (1.0 mL) was added TFA (20.0 mg) at room

temperature for 1 hour. After completion, purification by flash chromatography on silica gel (petroleum ether/EtOAc = 5/1) gave the deprotected product **4l**: 44.4 mg, as a white solid, 83% yield, 92:8 er, >20:1 dr; m.p. 243–245 °C,  $[\alpha]_D^{25} = 104.8$  (c 0.91, CH<sub>2</sub>Cl<sub>2</sub>). The ee was determined by HPLC (Chiralpak IC, 2-propanol/*n*-hexane = 30/70, flow rate 1.0 mL/min,  $\lambda = 254$  nm,  $t_{\text{major}} = 16.05$  min,  $t_{\text{minor}} = 25.69$  min). <sup>1</sup>H NMR (700 MHz, CDCl<sub>3</sub>):  $\delta = 8.58$  (s, 1H), 7.72–7.70 (m, 2H), 7.38–7.37 (m, 2H), 7.21 (dd,  $J_1 = 8.4$  Hz,  $J_2 = 4.2$  Hz, 1H), 7.18–7.16 (m, 1H), 6.93–6.82 (m, 4H), 6.43 (dd,  $J_1 = 9.1$  Hz,  $J_2 = 2.8$  Hz, 1H), 4.48 (dd,  $J_1 = 15.4$  Hz,  $J_2 = 4.2$  Hz, 1H), 3.90–3.86 (m, 4H),

3.13 (s, 3H), 2.98 (dd,  $J_1 = 15.4$  Hz,  $J_2 = 3.5$  Hz, 1H), 2.45 (s, 3H) ppm;  $^{13}\text{C}\{^1\text{H}\}$  NMR (150 MHz,  $\text{DMSO-}d_6$ ):  $\delta = 179.07, 169.71, 158.02$  (d,  $J = 234.5$  Hz), 145.34, 140.41, 135.56, 133.97, 133.28, 130.68 (2C), 130.41, 129.07, 128.54 (2C), 124.26, 123.66 (d,  $J = 10.5$  Hz), 123.00, 110.89 (d,  $J = 8.8$  Hz), 110.61 (d,  $J = 24.2$  Hz), 109.68, 103.25 (d,  $J = 24.2$  Hz), 101.36 (d,  $J = 4.4$  Hz), 51.57, 49.69, 47.02, 43.87, 33.12, 21.82 ppm;  $^{19}\text{F}$  NMR (658 MHz,  $\text{DMSO-}d_6$ ):  $\delta = -123.14$  ppm. For  $\text{C}_{28}\text{H}_{24}\text{FN}_3\text{O}_5\text{S}$   $[\text{M}+\text{Na}]^+$ : 556.1318; found 556.1315.

**methyl (3*S*,3'*R*)-6'-chloro-9'-methyl-2-oxo-1'-tosyl-1',2',3',9'-tetrahydrospiro[indoline-3,4'-pyrido[2,3-*b*]indole]-3'-carboxylate (4m):**

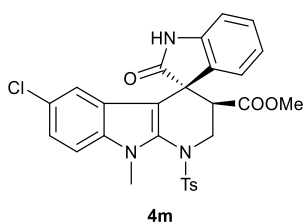

A mixture of **1a** (43.4 mg, 0.1 mmol) and **2c** (40.2 mg, 0.12 mmol) was added **C4** (6.5 mg, 20 mol%) in toluene (1.0 mL) at room temperature for 8 hours. After completion, purification by flash chromatography on silica gel (petroleum ether/EtOAc = 12/1) gave the protected product **3m**. To a solution of **3m** in toluene (1.0 mL) was added TFA (20.0 mg) at room temperature for 1 hour. After completion, purification by flash chromatography on silica gel (petroleum ether/EtOAc = 5/1) gave the deprotected product **4m**: 46.8 mg, as a white solid, 85% yield, 93:7 er, >20:1 dr; m.p. 254–256 °C,  $[\alpha]_{\text{D}}^{25} = 90.5$  (c 0.84,  $\text{CH}_2\text{Cl}_2$ ). The ee was determined by HPLC (Chiralpak IC, 2-propanol/*n*-hexane = 30/70, flow rate 1.0 mL/min,  $\lambda = 254$  nm,  $t_{\text{major}} = 13.68$  min,  $t_{\text{minor}} = 25.95$  min).  $^1\text{H}$  NMR (700 MHz,  $\text{DMSO-}d_6$ ):  $\delta = 10.84$  (s, 1H), 7.85 (d,  $J = 8.4$  Hz, 2H), 7.49 (t,  $J = 8.4$  Hz, 3H), 7.19 (td,  $J_1 = 7.7$  Hz,  $J_2 = 1.4$  Hz, 1H), 7.12 (dd,  $J_1 = 9.1$  Hz,  $J_2 = 2.1$  Hz, 1H), 6.98–6.97 (m, 2H), 6.77–6.75 (m, 1H), 6.58 (d,  $J = 2.1$  Hz 1H), 4.16 (dd,  $J_1 = 14.7$  Hz,  $J_2 = 3.5$  Hz, 1H), 3.98 (dd,  $J_1 = 14.7$  Hz,  $J_2 = 12.6$  Hz, 1H), 3.75 (s, 3H), 3.36–3.33 (m, 1H), 3.11 (s, 3H), 2.43 (s, 3H) ppm;  $^{13}\text{C}\{^1\text{H}\}$  NMR (175 MHz,  $\text{DMSO-}d_6$ ):  $\delta = 177.74, 169.35, 145.24, 141.87, 134.85, 134.30, 133.96, 130.50$  (2C), 130.47, 129.02, 128.06 (2C), 124.46, 124.42, 124.00, 121.84, 121.75, 116.22, 112.21, 109.35, 101.72, 51.38, 49.03, 46.49, 44.18, 32.28, 21.20 ppm. HRMS (ESI-TOF) Calcd. For  $\text{C}_{28}\text{H}_{24}\text{ClN}_3\text{O}_5\text{S}$   $[\text{M}+\text{Na}]^+$ : 572.1023; found 572.1017.

**methyl (3*S*,3'*R*)-6'-bromo-9'-methyl-2-oxo-1'-tosyl-1',2',3',9'-tetrahydrospiro[indoline-3,4'-pyrido[2,3-*b*]indole]-3'-carboxylate (4n):**

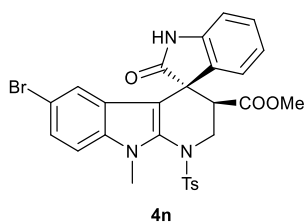

A mixture of **1a** (43.4 mg, 0.1 mmol) and **2d** (45.5 mg, 0.12 mmol) was added **C4** (6.5 mg, 20 mol%) in toluene (1.0 mL) at room temperature for 8 hours. After completion, purification by flash chromatography on silica gel (petroleum ether/EtOAc = 12/1) gave the protected product **3n**. To a solution of **3n** in toluene (1.0 mL) was added TFA (20.0 mg) at room temperature for 1 hour. After completion, purification by flash chromatography on silica gel

(petroleum ether/EtOAc = 5/1) gave the deprotected product **4n**: 46.3 mg, as a white solid, 78% yield, 96:4 er, >20:1 dr; m.p. 257–259 °C,  $[\alpha]_{\text{D}}^{25} = 87.2$  (c 0.83, CH<sub>2</sub>Cl<sub>2</sub>). The ee was determined by HPLC (Chiralpak IC, 2-propanol/*n*-hexane = 30/70, flow rate 1.0 mL/min,  $\lambda = 254$  nm,  $t_{\text{major}} = 13.49$  min,  $t_{\text{minor}} = 26.79$  min). **<sup>1</sup>H NMR (700 MHz, DMSO-*d*<sub>6</sub>)**:  $\delta = 10.86$  (s, 1H), 7.88–7.86 (m, 2H), 7.52–7.50 (m, 1H), 7.45 (d,  $J = 9.1$  Hz, 1H), 7.25 (dd,  $J_1 = 8.4$  Hz,  $J_2 = 2.1$  Hz, 1H), 7.22–7.20 (m, 1H), 7.00–6.98 (m, 2H), 6.79–6.75 (m, 2H), 4.18 (dd,  $J_1 = 14.7$  Hz,  $J_2 = 3.5$  Hz, 1H), 4.00 (dd,  $J_1 = 14.7$  Hz,  $J_2 = 12.6$  Hz, 1H), 3.76 (s, 3H), 3.38–3.36 (m, 1H), 3.13 (s, 3H), 2.45 (s, 3H) ppm; **<sup>13</sup>C{<sup>1</sup>H} NMR (175 MHz, DMSO-*d*<sub>6</sub>)**:  $\delta = 177.73, 169.34, 145.25, 141.87, 134.68, 134.54, 133.94, 130.50$  (2C), 130.47, 129.02, 128.05 (2C), 124.66, 124.46, 124.41, 121.76, 119.26, 112.63, 112.38, 109.33, 101.61, 51.38, 49.03, 46.48, 44.16, 32.27, 21.21 ppm. HRMS (ESI-TOF) Calcd. For C<sub>28</sub>H<sub>24</sub><sup>79</sup>BrN<sub>3</sub>O<sub>5</sub>S [M+Na]<sup>+</sup>: 616.0518; found 616.0518; Calcd. For C<sub>28</sub>H<sub>24</sub><sup>81</sup>BrN<sub>3</sub>O<sub>5</sub>S [M+Na]<sup>+</sup>: 618.0497; found 618.0502.

**methyl (3*S*,3'*R*)-6',9'-dimethyl-2-oxo-1'-tosyl-1',2',3',9'-tetrahydrospiro[indoline-3,4'-pyrido[2,3-*b*]indole]-3'-carboxylate (4o):**

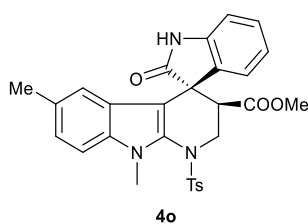

A mixture of **1a** (43.4 mg, 0.1 mmol) and **2e** (37.7 mg, 0.12 mmol) was added **C4** (6.5 mg, 20 mol%) in toluene (1.0 mL) at room temperature for 8 hours. After completion, purification by flash chromatography on silica gel (petroleum ether/EtOAc = 12/1) gave the protected product **3o**. To a solution of **3o** in toluene (1.0 mL) was added TFA (20.0 mg) at room temperature for 1 hour. After completion, purification by flash chromatography on silica gel (petroleum ether/EtOAc = 5/1) gave the deprotected product **4o**: 38.1 mg, as a white solid, 72% yield, 93:7 er, >20:1 dr; m.p. 232–233 °C,  $[\alpha]_{\text{D}}^{25} = 114.9$  (c 0.71, CH<sub>2</sub>Cl<sub>2</sub>). The ee was determined by HPLC (Chiralpak IC, 2-propanol/*n*-hexane = 30/70, flow rate 1.0 mL/min,  $\lambda = 254$  nm,  $t_{\text{major}} = 16.80$  min,  $t_{\text{minor}} = 27.84$  min). **<sup>1</sup>H NMR (700 MHz, DMSO-*d*<sub>6</sub>)**:  $\delta = 10.74$  (s, 1H), 7.82 (d,  $J = 8.4$  Hz, 2H), 7.48 (d,  $J = 7.7$  Hz, 2H), 7.30 (d,  $J = 8.4$  Hz, 1H), 7.16 (td,  $J_1 = 7.7$  Hz,  $J_2 = 1.4$  Hz, 1H), 6.93 (td,  $J_1 = 8.4$  Hz,  $J_2 = 1.4$  Hz, 3H), 6.73–6.71 (m, 1H), 6.44 (s, 1H), 4.16–4.13 (m, 1H), 3.97–3.93 (m, 1H), 3.71 (s, 3H), 3.30–3.29 (m, 1H), 3.10 (s, 3H), 2.42 (s, 3H), 2.13 (s, 3H) ppm; **<sup>13</sup>C{<sup>1</sup>H} NMR (175 MHz, DMSO-*d*<sub>6</sub>)**:  $\delta = 178.04, 169.53, 145.04, 142.02, 134.26, 134.11, 133.33, 130.85$  (2C), 130.44, 128.74 (2C), 128.32, 128.01, 124.36, 123.38, 123.27, 121.52, 117.00, 110.05, 109.18, 101.45, 51.31, 49.21, 46.50, 44.22, 32.03, 21.25, 21.20 ppm. HRMS (ESI-TOF) Calcd. For C<sub>29</sub>H<sub>27</sub>N<sub>3</sub>O<sub>5</sub>S [M+Na]<sup>+</sup>: 552.1569; found 552.1569.

**methyl (3*S*,3'*R*)-6'-methoxy-9'-methyl-2-oxo-1'-tosyl-1',2',3',9'-tetrahydrospiro[indoline-3,4'-pyrido[2,3-*b*]indole]-3'-carboxylate (4p):**

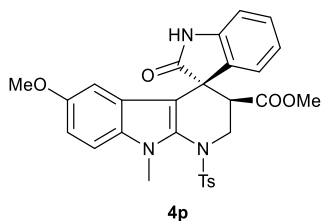

A mixture of **1a** (43.4 mg, 0.1 mmol) and **2f** (39.7 mg, 0.12 mmol) was added **C4** (6.5 mg, 20 mol%) in toluene (1.0 mL) at room temperature for 9 hours. After completion, purification by flash chromatography on silica gel (petroleum ether/EtOAc = 10/1) gave the protected product **3p**. To a solution of **3p** in toluene (1.0 mL) was added TFA (20.0 mg) at room temperature for 1 hour. After completion, purification by flash chromatography on silica gel (petroleum ether/EtOAc = 3/1) gave the deprotected product **4p**: 38.7 mg, as a white solid, 71% yield, 94:6 er, >20:1 dr; m.p. 259–261 °C,  $[\alpha]_D^{25} = 109.7$  (c 0.92, CH<sub>2</sub>Cl<sub>2</sub>). The ee was determined by HPLC (Chiralpak IE, 2-propanol/*n*-hexane = 30/70, flow rate 1.0 mL/min,  $\lambda = 254$  nm,  $t_{\text{major}} = 80.95$  min,  $t_{\text{minor}} = 48.32$  min). <sup>1</sup>H NMR (700 MHz, DMSO-*d*<sub>6</sub>):  $\delta = 10.78$  (s, 1H), 7.84 (d,  $J = 7.7$  Hz, 2H), 7.50 (d,  $J = 8.4$  Hz, 2H), 7.34 (d,  $J = 8.4$  Hz, 1H), 7.19–7.17 (m, 1H), 6.96 (d,  $J = 7.7$  Hz, 2H), 6.78–6.74 (m, 2H), 6.14 (d,  $J = 2.8$  Hz, 1H), 4.18 (dd,  $J_1 = 14.7$  Hz,  $J_2 = 3.5$  Hz, 1H), 3.97 (dd,  $J_1 = 15.4$  Hz,  $J_2 = 5.6$  Hz, 1H), 3.72 (s, 3H), 3.51 (s, 3H), 3.36–3.35 (m, 1H), 3.14 (s, 3H), 2.44 (s, 3H)ppm; <sup>13</sup>C{<sup>1</sup>H} NMR (175 MHz, DMSO-*d*<sub>6</sub>):  $\delta = 178.31, 170.03, 154.09, 145.51, 142.56, 134.59, 134.22, 131.53, 131.22, 130.92$  (2C), 129.19, 128.50 (2C), 124.90, 123.93, 122.06, 111.52, 111.07, 109.55, 102.16, 100.83, 55.51, 51.79, 49.69, 47.05, 44.56, 32.55, 21.67 ppm. HRMS (ESI-TOF) Calcd. For C<sub>29</sub>H<sub>27</sub>N<sub>3</sub>O<sub>6</sub>S [M+Na]<sup>+</sup>: 568.1518; found 568.1520.

**methyl (3*S*,3'*R*)-7'-fluoro-9'-dimethyl-2-oxo-1'-tosyl-1',2',3',9'-tetrahydrospiro[indoline-3,4'-pyrido[2,3-*b*]indole]-3'-carboxylate (4q):**

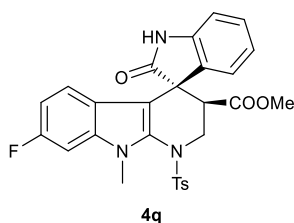

A mixture of **1a** (43.4 mg, 0.1 mmol) and **2g** (38.2 mg, 0.12 mmol) was added **C4** (6.5 mg, 20 mol%) in toluene (1.0 mL) at room temperature for 8 hours. After completion, purification by flash chromatography on silica gel (petroleum ether/EtOAc = 12/1) gave the protected product **3q**. To a solution of **3q** in toluene (1.0 mL) was added TFA (20.0 mg) at room temperature for 1 hour. After completion, purification by flash chromatography on silica gel (petroleum ether/EtOAc = 5/1) gave the deprotected product **4q**: 42.1 mg, as a white solid, 79% yield, 89:11 er, >20:1 dr; m.p. 229–231 °C,  $[\alpha]_D^{25} = 115.4$  (c 0.76, CH<sub>2</sub>Cl<sub>2</sub>). The ee was determined by HPLC (Chiralpak IC, 2-propanol/*n*-hexane = 30/70, flow rate 1.0 mL/min,  $\lambda = 254$  nm,  $t_{\text{major}} = 16.99$  min,  $t_{\text{minor}} = 23.01$  min). <sup>1</sup>H NMR (700 MHz, DMSO-*d*<sub>6</sub>):  $\delta = 10.82$  (s, 1H), 7.88 (d,  $J = 8.4$  Hz, 2H), 7.51 (d,  $J = 8.4$  Hz, 2H), 7.36 (dd,  $J_1 = 9.8$  Hz,  $J_2 = 2.1$  Hz, 1H), 7.18 (td,  $J_1 = 7.7$  Hz,  $J_2 = 0.7$  Hz, 1H), 6.96 (dd,  $J_1 = 15.3$  Hz,  $J_2 = 7.7$  Hz, 1H), 6.76–6.74 (m, 2H), 6.61 (dd,  $J_1 = 9.1$  Hz,  $J_2 =$

5.6 Hz, 1H), 4.15 (dd,  $J_1 = 14.7$  Hz,  $J_2 = 3.5$  Hz, 1H), 3.97 (dd,  $J_1 = 14.7$  Hz,  $J_2 = 12.6$  Hz, 1H), 3.74 (s, 3H), 3.39 (dd,  $J_1 = 11.9$  Hz,  $J_2 = 3.5$  Hz, 1H), 3.12 (s, 3H), 2.45 (s, 3H) ppm;  $^{13}\text{C}\{^1\text{H}\}$  NMR (175 MHz, DMSO- $d_6$ ):  $\delta = 178.37, 169.92, 159.59$  (d,  $J = 234.9$  Hz), 145.62, 142.42, 136.46 (d,  $J = 12.4$  Hz), 134.36, 134.34, 131.18, 130.95 (2C), 129.32, 128.56 (2C), 124.89, 122.07, 120.14, 118.73 (d,  $J = 10.0$  Hz), 109.83, 108.69 (d,  $J = 24.3$  Hz), 102.71, 97.65 (d,  $J = 25.7$  Hz), 51.81, 49.61, 46.99, 44.75, 32.68, 21.67 ppm;  $^{19}\text{F}$  NMR (658 MHz, DMSO- $d_6$ ):  $\delta = -119.47$  ppm. HRMS (ESI-TOF) For  $\text{C}_{28}\text{H}_{24}\text{FN}_3\text{O}_5\text{S}$   $[\text{M}+\text{Na}]^+$ : 556.1318; found 556.1314.

**methyl (3*S*,3'*R*)-7'-chloro-9'-methyl-2-oxo-1'-tosyl-1',2',3',9'-tetrahydrospiro[indoline-3,4'-pyrido[2,3-*b*]indole]-3'-carboxylate (4r):**

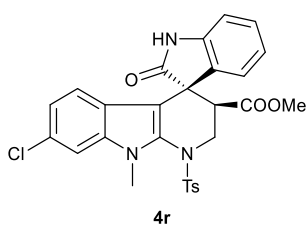

A mixture of **1a** (43.4 mg, 0.1 mmol) and **2h** (40.2 mg, 0.12 mmol) was added **C4** (6.5 mg, 20 mol%) in toluene (1.0 mL) at room temperature for 8 hours. After completion, purification by flash chromatography on silica gel (petroleum ether/EtOAc = 12/1) gave the protected product **3r**. To a solution of **3r** in toluene (1.0 mL) was added TFA (20.0 mg) at room temperature for 1 hour. After completion, purification by flash chromatography on silica gel (petroleum ether/EtOAc = 5/1) gave the deprotected product **4r**: 44.7 mg, as a white solid, 81% yield, 93:7 er, >20:1 dr; m.p. 229–230 °C,  $[\alpha]_{\text{D}}^{25} = 71.54$  (c 0.74,  $\text{CH}_2\text{Cl}_2$ ). The ee was determined by HPLC (Chiralpak IC, 2-propanol/*n*-hexane = 30/70, flow rate 1.0 mL/min,  $\lambda = 254$  nm,  $t_{\text{major}} = 16.07$  min,  $t_{\text{minor}} = 23.83$  min).  $^1\text{H}$  NMR (600 MHz, DMSO- $d_6$ ):  $\delta = 10.83$  (s, 1H), 7.88–7.86 (m, 2H), 7.60 (d,  $J = 7.8$  Hz, 1H), 7.51 (d,  $J = 7.8$  Hz, 2H), 7.18 (td,  $J_1 = 7.8$  Hz,  $J_2 = 1.2$  Hz, 1H), 6.95 (dd,  $J_1 = 13.8$  Hz,  $J_2 = 7.2$  Hz, 2H), 6.90 (dd,  $J_1 = 8.4$  Hz,  $J_2 = 1.8$  Hz, 1H), 6.74 (td,  $J_1 = 7.8$  Hz,  $J_2 = 1.2$  Hz, 1H), 6.60 (d,  $J = 8.4$  Hz, 1H), 4.15 (dd,  $J_1 = 15.0$  Hz,  $J_2 = 3.6$  Hz, 1H), 3.97 (dd,  $J_1 = 15.0$  Hz,  $J_2 = 12.0$  Hz, 1H), 3.75 (s, 3H), 3.39–3.38 (m, 1H), 3.12 (s, 3H), 2.44 (s, 3H) ppm;  $^{13}\text{C}\{^1\text{H}\}$  NMR (150 MHz, DMSO- $d_6$ ):  $\delta = 178.37, 169.94, 145.75, 142.46, 136.79, 134.84, 134.53, 131.17, 131.03$  (2C), 129.42, 128.61 (2C), 127.35, 124.97, 122.27, 122.15, 120.77, 118.97, 110.94, 109.93, 102.82, 51.89, 49.62, 47.05, 44.84, 32.74, 21.74. ppm. HRMS (ESI-TOF) Calcd. For  $\text{C}_{28}\text{H}_{24}\text{ClN}_3\text{O}_5\text{S}$   $[\text{M}+\text{Na}]^+$ : 572.1023; found 572.1018.

**methyl (3*S*,3'*R*)-7',9'-dimethyl-2-oxo-1'-tosyl-1',2',3',9'-tetrahydrospiro[indoline-3,4'-pyrido[2,3-*b*]indole]-3'-carboxylate (4*s*):**

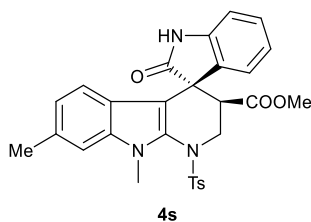

A mixture of **1a** (43.4 mg, 0.1 mmol) and **2i** (37.7 mg, 0.12 mmol) was added **C4** (6.5 mg, 20 mol%) in toluene (1.0 mL) at room temperature for 9 hours. After completion, purification by flash chromatography on silica gel (petroleum ether/EtOAc = 12/1) gave the protected product **3s**. To a solution of **3s** in toluene (1.0 mL) was added TFA (20.0 mg) at room temperature for 1 hour. After completion, purification by flash chromatography on silica gel (petroleum ether/EtOAc = 5/1) gave the deprotected product **4s**: 36.7 mg, as a white solid, 69% yield, 91:9 er, >20:1 dr; m.p. 202–204 °C,  $[\alpha]_{\text{D}}^{25} = 79.9$  (c 0.79, CH<sub>2</sub>Cl<sub>2</sub>). The ee was determined by HPLC (Chiralpak IE, 2-propanol/*n*-hexane = 30/70, flow rate 1.0 mL/min,  $\lambda = 254$  nm,  $t_{\text{major}} = 63.60$  min,  $t_{\text{minor}} = 37.77$  min). **<sup>1</sup>H NMR (600 MHz, *d*-DMSO):**  $\delta = 10.76$  (s, 1H), 7.85–7.83 (m, 2H), 7.49 (d,  $J = 7.8$  Hz, 2H), 7.22 (s, 1H), 7.15 (td,  $J_1 = 7.8$  Hz,  $J_2 = 1.2$  Hz, 1H), 6.93 (d,  $J = 7.8$  Hz, 2H), 6.72 (td,  $J_1 = 7.8$  Hz,  $J_2 = 1.2$  Hz, 1H), 6.67 (dd,  $J_1 = 8.4$  Hz,  $J_2 = 1.2$  Hz, 1H), 6.53 (d,  $J = 7.8$  Hz, 1H), 4.15 (dd,  $J_1 = 15.0$  Hz,  $J_2 = 3.6$  Hz, 1H), 3.95 (dd,  $J_1 = 15.0$  Hz,  $J_2 = 12.0$  Hz, 1H), 3.72 (s, 3H), 3.37–3.36 (m, 1H), 3.11 (s, 3H), 2.44 (s, 3H), 2.33 (s, 3H) ppm; **<sup>13</sup>C{<sup>1</sup>H} NMR (150 MHz, DMSO-*d*<sub>6</sub>):**  $\delta = 178.59, 170.11, 145.57, 142.52, 136.69, 134.65, 133.25, 131.86, 131.50, 130.98$  (2C), 129.21, 128.57 (2C), 124.88, 122.01, 121.95, 121.44, 117.60, 110.64, 109.76, 102.48, 51.84, 49.75, 47.10, 44.74, 32.41, 21.94, 21.73 ppm. HRMS (ESI-TOF) Calcd. For C<sub>29</sub>H<sub>27</sub>N<sub>3</sub>O<sub>5</sub>S [M+Na]<sup>+</sup>: 552.1569; found 552.1568.

**methyl (3*S*,3'*R*)-8',9'-dimethyl-2-oxo-1'-tosyl-1',2',3',9'-tetrahydrospiro[indoline-3,4'-pyrido[2,3-*b*]indole]-3'-carboxylate (4*t*):**

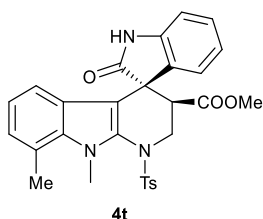

A mixture of **1a** (43.4 mg, 0.1 mmol) and **2j** (37.7 mg, 0.12 mmol) was added **C4** (6.5 mg, 20 mol%) in toluene (1.0 mL) at room temperature for 8 hours. After completion, purification by flash chromatography on silica gel (petroleum ether/EtOAc = 12/1) gave the protected product **3t**. To a solution of **3t** in toluene (1.0 mL) was added TFA (20.0 mg) at room temperature for 1 hour. After completion, purification by flash chromatography on silica gel (petroleum ether/EtOAc = 5/1) gave the deprotected product **4t**: 39.4 mg, as a white solid, 74% yield, 92:8 er, >20:1 dr; m.p. 235–237 °C,  $[\alpha]_{\text{D}}^{25} = 135.8$  (c 0.68, CH<sub>2</sub>Cl<sub>2</sub>). The ee was determined by HPLC (Chiralpak IA, 2-propanol/*n*-hexane = 30/70, flow rate 1.0 mL/min,  $\lambda = 254$  nm,  $t_{\text{major}} = 14.33$  min,  $t_{\text{minor}} = 20.56$  min). **<sup>1</sup>H NMR (700 MHz, DMSO-*d*<sub>6</sub>):**  $\delta = 10.82$  (s, 1H), 7.87 (d,  $J = 8.4$  Hz, 2H), 7.50 (d,  $J = 8.4$  Hz, 2H), 7.41 (d,  $J = 8.4$  Hz, 1H), 7.11–7.09 (m, 1H), 6.98 (d,  $J = 7.7$  Hz, 1H), 6.83

(t,  $J = 7.7$  Hz, 1H), 6.75 (d,  $J = 7.7$  Hz, 1H), 6.64–6.62 (m, 2H), 4.13 (dd,  $J_1 = 14.7$  Hz,  $J_2 = 3.5$  Hz, 1H), 3.93 (dd,  $J_1 = 15.4$  Hz,  $J_2 = 12.6$  Hz, 1H), 3.74 (s, 3H), 3.38 (dd,  $J_1 = 12.6$  Hz,  $J_2 = 3.5$  Hz, 1H), 3.09 (s, 3H), 2.43 (s, 3H), 2.29 (s, 3H)) ppm;  $^{13}\text{C}\{^1\text{H}\}$  NMR (175 MHz, DMSO- $d_6$ ):  $\delta = 178.60$ , 169.54, 145.08, 140.58, 135.76, 134.13, 133.32, 130.49 (2C), 130.47, 129.86, 128.05 (2C), 123.12, 121.92, 121.66, 121.43, 119.88, 118.57, 117.38, 110.21, 102.07, 51.21, 49.47, 46.50, 44.53, 31.92, 21.19, 16.52. ppm. HRMS (ESI-TOF) Calcd. For  $\text{C}_{29}\text{H}_{27}\text{N}_3\text{O}_5\text{S}$   $[\text{M}+\text{Na}]^+$ : 552.1569; found 552.1562.

**methyl (3*S*,3'*R*)-2-oxo-1'-tosyl-1',2',3',9'-tetrahydrospiro[indoline-3,4'-pyrido[2,3-*b*]indole]-3'-carboxylate (4u):**

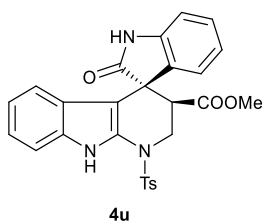

A mixture of **1a** (43.4 mg, 0.1 mmol) and **2k** (34.4 mg, 0.12 mmol) was added **C4** (6.5 mg, 20 mol%) in toluene (1.0 mL) at room temperature for 8 hours. After completion, purification by flash chromatography on silica gel (petroleum ether/EtOAc = 12/1) gave the protected product **3u**. To a solution of **3u** in toluene (1.0 mL) was added TFA (20.0 mg) at room temperature for 1 hour. After completion, purification by flash chromatography on silica gel (petroleum ether/EtOAc = 5/1) gave the deprotected product **4u**: 36.3 mg, as a white solid, 72% yield, 81:19 er, >20:1 dr; m.p. 279–280 °C,  $[\alpha]_{\text{D}}^{25} = 79.6$  (c 0.54,  $\text{CH}_2\text{Cl}_2$ ). The ee was determined by HPLC (Chiralpak IA, 2-propanol/*n*-hexane = 30/70, flow rate 1.0 mL/min,  $\lambda = 254$  nm,  $t_{\text{major}} = 15.16$  min,  $t_{\text{minor}} = 16.88$  min).  $^1\text{H}$  NMR (600 MHz, DMSO- $d_6$ ):  $\delta = 11.14$  (s, 1H), 10.74 (s, 1H), 7.74–7.71 (m, 2H), 7.44–7.42 (m, 3H), 7.16 (td,  $J_1 = 7.8$  Hz,  $J_2 = 1.2$  Hz, 1H), 6.99–6.96 (m, 1H), 6.93–6.90 (m, 2H), 6.78–6.73 (m, 2H), 6.62 (d,  $J = 8.4$  Hz, 1H), 4.43 (dd,  $J_1 = 14.4$  Hz,  $J_2 = 3.6$  Hz, 1H), 3.98 (dd,  $J_1 = 14.4$  Hz,  $J_2 = 12.6$  Hz, 1H), 3.17 (s, 3H), 2.90 (dd,  $J_1 = 13.2$  Hz,  $J_2 = 3.6$  Hz, 1H), 2.38 (s, 3H) ppm;  $^{13}\text{C}\{^1\text{H}\}$  NMR (150 MHz, DMSO- $d_6$ ):  $\delta = 177.81$ , 169.08, 144.76, 141.96, 133.86, 133.68, 131.82, 130.47, 130.38 (2C), 128.64, 127.19 (2C), 124.40, 123.44, 121.48, 121.06, 119.42, 116.57, 111.97, 109.34, 98.23, 59.77, 51.43, 48.87, 44.66, 21.13 ppm. HRMS (ESI-TOF) Calcd. For  $\text{C}_{27}\text{H}_{23}\text{N}_3\text{O}_5\text{S}$   $[\text{M}+\text{Na}]^+$ : 524.1256; found 524.1253.



**methyl (3S,3'R)-1-benzyl-9'-methyl-2-oxo-1'-tosyl-1',2',3',9'-tetrahydrospiro[indoline-3,4'-pyrido[2,3-b]indole]-3'-carboxylate (4v):**

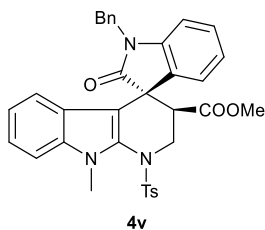

A mixture of **11** (42.4 mg, 0.1 mmol) and **2a** (36.1 mg, 0.12 mmol) was added **C4** (6.5 mg, 20 mol%) in toluene (1.0 mL) at room temperature for 6 hours. After completion, purification by flash chromatography on silica gel (petroleum ether/EtOAc = 12/1) gave the protected product **4v**: 55.1 mg, as a white solid, 91% yield, 94:6 er, >20:1 dr; m.p. 237–239 °C,  $[\alpha]_D^{25} = 107.4$  (c 1.03, CH<sub>2</sub>Cl<sub>2</sub>). The ee was determined by HPLC (Chiralpak IE, 2-propanol/*n*-hexane = 30/70, flow rate 1.0 mL/min,  $\lambda = 254$  nm,  $t_{\text{major}} = 23.57$  min,  $t_{\text{minor}} = 65.54$  min). **<sup>1</sup>H NMR (600 MHz, DMSO-*d*<sub>6</sub>)**:  $\delta = 7.70$  (d,  $J = 8.4$  Hz, 2H), 7.43–7.41 (m, 2H), 7.34 (d,  $J = 7.8$  Hz, 2H), 7.31–7.25 (m, 3H), 7.22 (d,  $J = 8.4$  Hz, 1H), 7.08–7.05 (m, 2H), 6.82 (d,  $J = 7.8$  Hz, 1H), 6.77–6.72 (m, 2H), 6.69–6.66 (m, 1H), 6.39 (d,  $J = 7.8$  Hz, 1H), 4.91 (dd,  $J_1 = 18.6$  Hz,  $J_2 = 15.0$  Hz, 2H), 4.39 (dd,  $J_1 = 15.0$  Hz,  $J_2 = 3.6$  Hz, 1H), 3.84–3.79 (m, 4H), 2.97 (dd,  $J_1 = 12.6$  Hz,  $J_2 = 3.6$  Hz, 1H), 2.88 (s, 3H), 2.42 (s, 3H) ppm; **<sup>13</sup>C{<sup>1</sup>H} NMR (150 MHz, DMSO-*d*<sub>6</sub>)**:  $\delta = 177.22, 170.03, 142.88, 136.76, 136.15, 134.47, 134.14, 130.81, 130.53$  (2C), 128.78 (2C), 128.68 (2C), 128.65 (2C), 127.99, 124.15, 123.54, 122.86, 122.36, 120.25, 118.22, 110.04, 108.62, 101.76, 51.48, 49.43, 47.31, 44.86, 44.20, 32.90, 21.90. ppm. HRMS (ESI-TOF) Calcd. For C<sub>35</sub>H<sub>31</sub>N<sub>3</sub>O<sub>5</sub>S [M+Na]<sup>+</sup>: 628.1882; found 628.1880.

**ethyl (3S,3'R)-9'-methyl-2-oxo-1'-tosyl-1',2',3',9'-tetrahydrospiro[indoline-3,4'-pyrido[2,3-b]indole]-3'-carboxylate (4w):**

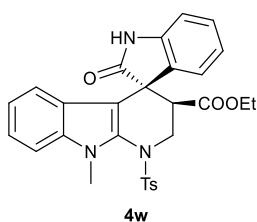

A mixture of **1m** (44.8 mg, 0.1 mmol) and **2a** (36.1 mg, 0.12 mmol) was added **C4** (6.5 mg, 20 mol%) in toluene (1.0 mL) at room temperature for 8 hours. After completion, purification by flash chromatography on silica gel (petroleum ether/EtOAc = 12/1) gave the protected product **3w**. To a solution of **3w** in toluene (1.0 mL) was added TFA (20.0 mg) at room temperature for

1 hour. After completion, purification by flash chromatography on silica gel (petroleum ether/EtOAc = 5/1) gave the deprotected product **4w**: 46.5 mg, as a white solid, 88% yield, 94:6 er, >20:1 dr; m.p. 232–234 °C,  $[\alpha]_D^{25} = 91.7$  (c 0.87, CH<sub>2</sub>Cl<sub>2</sub>). The ee was determined by HPLC (Chiralpak IA, 2-propanol/*n*-hexane = 30/70, flow rate 1.0 mL/min,  $\lambda = 254$  nm,  $t_{\text{major}} = 42.94$  min,  $t_{\text{minor}} = 17.69$  min). **<sup>1</sup>H NMR (700 MHz, *d*-DMSO)**:  $\delta = 10.78$  (s, 1H), 7.86 (d,  $J = 8.4$  Hz, 2H), 7.51–7.49 (m, 2H), 7.41 (d,  $J = 8.4$  Hz, 1H), 7.16 (td,  $J_1 = 7.7$  Hz,  $J_2 = 1.4$  Hz, 1H), 7.11–7.09 (m, 1H), 6.94 (dd,  $J_1 = 14.7$  Hz,  $J_2 = 7.7$  Hz, 2H), 6.83 (t,  $J = 7.0$  Hz, 1H); 6.72 (t,  $J = 7.0$  Hz, 1H), 6.67 (d,  $J = 8.4$  Hz, 1H), 4.12 (dd,  $J_1 = 14.7$  Hz,  $J_2 = 3.5$  Hz, 1H), 3.95 (dd,  $J_1 = 15.4$  Hz,  $J_2 = 3.5$  Hz,

1H), 3.74 (s, 3H), 3.64–3.56 (m, 2H), 3.35 (dd,  $J_1 = 10.5$  Hz,  $J_2 = 11.2$  Hz, 1H), 2.43 (s, 3H), 0.69–0.67 (m, 3H) ppm;  $^{13}\text{C}\{^1\text{H}\}$  NMR (175 MHz, DMSO- $d_6$ ):  $\delta = 178.10, 169.11, 145.09, 142.31, 135.78, 134.14, 133.37, 130.87$  (2C), 130.48, 128.72 (2C), 128.05, 124.43, 123.04, 121.92, 121.50, 119.87, 117.29, 110.25, 109.35, 102.06, 60.26, 54.92, 49.18, 46.63, 43.94, 31.95, 21.20, 13.11 ppm. HRMS (ESI-TOF) Calcd. For  $\text{C}_{29}\text{H}_{27}\text{N}_3\text{O}_5\text{S}$   $[\text{M}+\text{Na}]^+$ : 552.1569; found 552.1569.

**tert-butyl (3*S*,3'*R*)-9'-methyl-2-oxo-1'-tosyl-1',2',3',9'-tetrahydrospiro[indoline-3,4'-pyrido[2,3-*b*]indole]-3'-carboxylate (4x)**

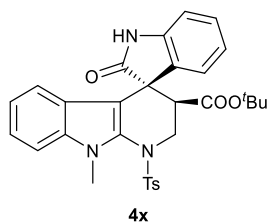

A mixture of **1n** (47.6 mg, 0.1 mmol) and **2a** (36.1 mg, 0.12 mmol) was added **C4** (6.5 mg, 20 mol%) in toluene (1.0 mL) at room temperature for 8 hours. After completion, purification by flash chromatography on silica gel (petroleum ether/EtOAc = 12/1) gave the protected product **3x**. To a solution of **3x** in toluene (1.0 mL) was added TFA (20.0 mg) at room temperature for 1 hour. After completion, purification by flash chromatography on silica gel (petroleum ether/EtOAc = 5/1) gave the deprotected product **4x**: 45.3 mg, as a white solid, 81% yield, 91:9 er, >20:1 dr; m.p. 235–237 °C,  $[\alpha]_{\text{D}}^{25} = 70.4$  (c 0.67,  $\text{CH}_2\text{Cl}_2$ ). The ee was determined by HPLC (Chiralpak IA, 2-propanol/*n*-hexane = 30/70, flow rate 1.0 mL/min,  $\lambda = 254$  nm,  $t_{\text{major}} = 71.05$  min,  $t_{\text{minor}} = 18.37$  min).  $^1\text{H}$  NMR (600 MHz, DMSO- $d_6$ ):  $\delta = 10.81$  (s, 1H), 7.91–7.90 (m, 2H), 7.53 (d,  $J = 8.4$  Hz, 2H), 7.41 (d,  $J = 8.4$  Hz, 1H), 7.19 (td,  $J_1 = 7.8$  Hz,  $J_2 = 1.2$  Hz, 1H), 7.12–7.09 (m, 1H), 6.99–6.97 (m, 2H), 6.86–6.83 (m, 1H), 6.75–6.70 (m, 2H), 4.06 (dd,  $J_1 = 14.4$  Hz,  $J_2 = 3.6$  Hz, 1H), 3.87 (dd,  $J_1 = 15.0$  Hz,  $J_2 = 12.6$  Hz, 1H), 3.74 (s, 3H), 3.27 (dd,  $J_1 = 12.6$  Hz,  $J_2 = 3.0$  Hz, 1H), 2.45 (s, 3H), 0.95 (s, 9H) ppm;  $^{13}\text{C}\{^1\text{H}\}$  NMR (175 MHz, DMSO- $d_6$ ):  $\delta = 178.20, 168.35, 145.11, 142.62, 135.69, 134.20, 133.33, 131.25, 130.51$  (2C), 128.65, 128.02 (2C), 124.39, 123.00, 121.86, 121.53, 119.83, 117.32, 110.18, 109.35, 102.20, 81.11, 49.09, 46.74, 44.41, 31.80, 26.77, 21.18 ppm. HRMS (ESI-TOF) Calcd. For  $\text{C}_{31}\text{H}_{31}\text{N}_3\text{O}_5\text{S}$   $[\text{M}+\text{Na}]^+$ : 580.1882; found 580.1881.

### 3. X-ray crystal structure of 4a

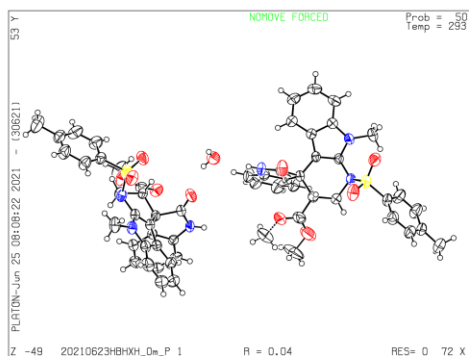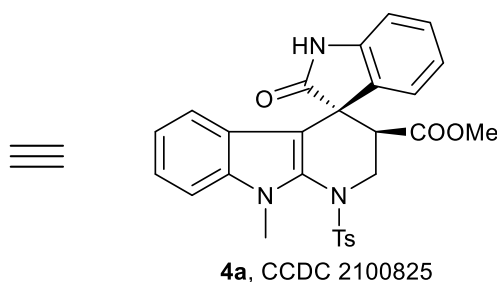

(dimer, connection with a H<sub>2</sub>O molecule)

|                                     |                                                                                             |
|-------------------------------------|---------------------------------------------------------------------------------------------|
| Theta range for data collection     | 3.10 to 68.53°                                                                              |
| Index ranges                        | -9<=h<=9, -13<=k<=13, -16<=l<=17                                                            |
| Reflections collected               | 43996                                                                                       |
| Independent reflections             | 9179 [R(int) = 0.0432]                                                                      |
| Coverage of independent reflections | 99.6%                                                                                       |
| Absorption correction               | Multi-Scan                                                                                  |
| Structure solution technique        | direct methods                                                                              |
| Structure solution program          | SHELXT 2014/5 (Sheldrick, 2014)                                                             |
| Refinement method                   | Full-matrix least-squares on F <sup>2</sup>                                                 |
| Refinement program                  | SHELXL-2016/6 (Sheldrick, 2016)                                                             |
| Function minimized                  | $\Sigma w(F_o^2 - F_c^2)^2$                                                                 |
| Data / restraints / parameters      | 9179 / 3 / 705                                                                              |
| Goodness-of-fit on F <sup>2</sup>   | 1.076                                                                                       |
| $\Delta/\sigma_{\max}$              | 0.003                                                                                       |
| Final R indices                     | 8600 data; I>2 $\sigma$ (I) R1 = 0.0356, wR2 = 0.0886<br>all data R1 = 0.0382, wR2 = 0.0908 |
| Weighting scheme                    | $w=1/[\sigma^2(F_o^2)+(0.0466P)^2+0.1655P]$<br>where $P=(F_o^2+2F_c^2)/3$                   |
| Absolute structure parameter        | 0.027(6)                                                                                    |
| Largest diff. peak and hole         | 0.393 and -0.255 eÅ <sup>-3</sup>                                                           |
| R.M.S. deviation from mean          | 0.041 eÅ <sup>-3</sup>                                                                      |

## 4. NMR and HPLC spectra

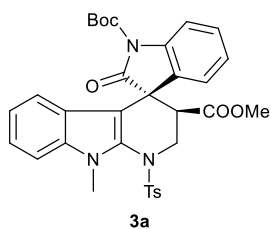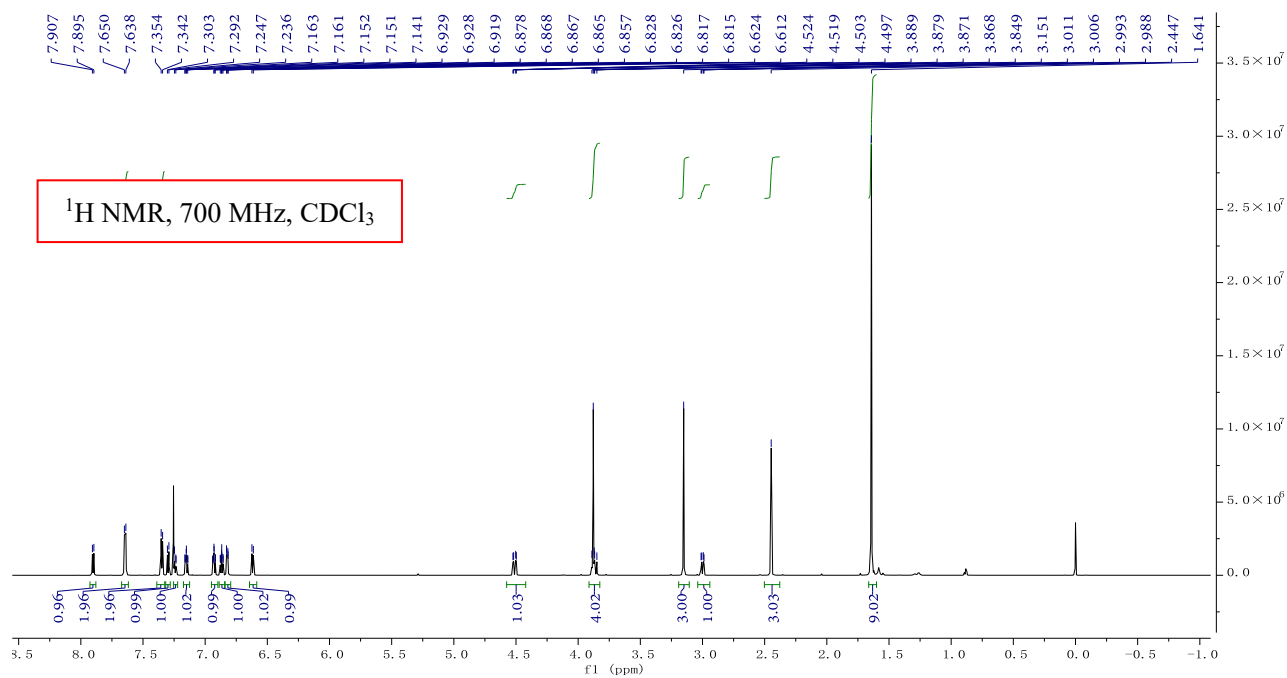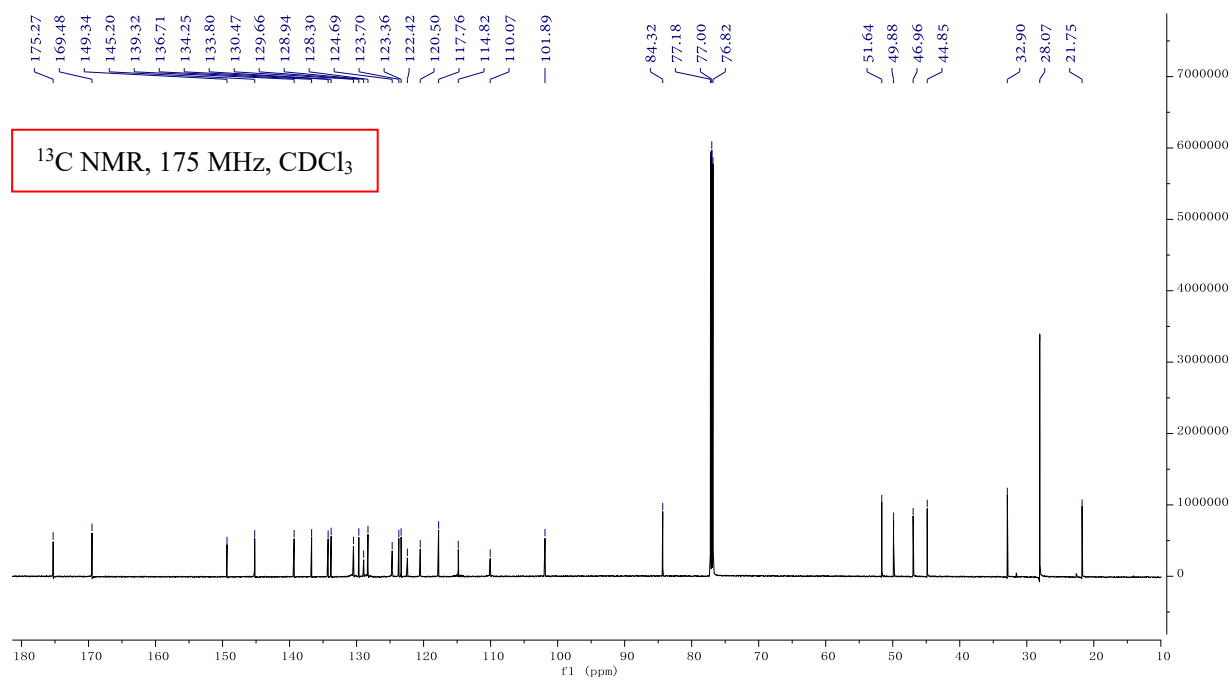

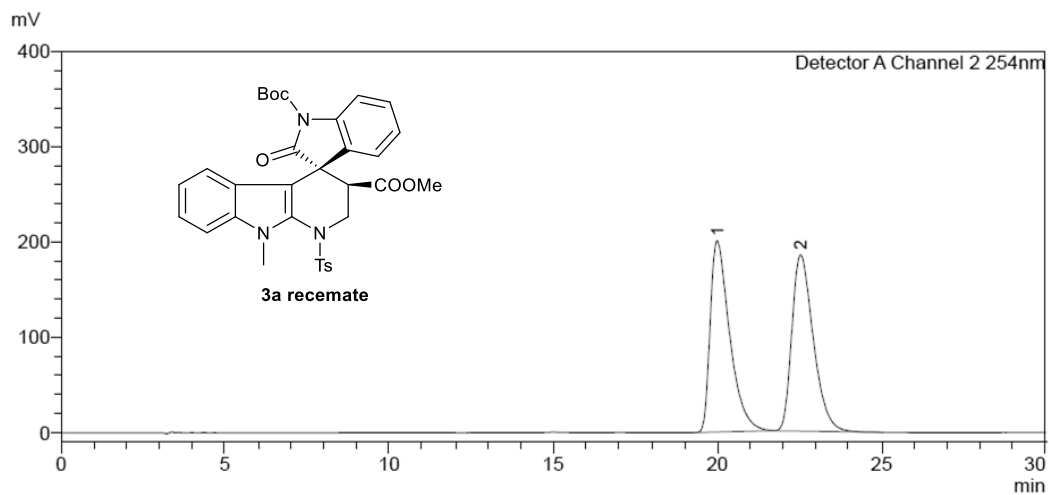

### Peak Analysis Report

Detector A Channel 2 254nm

| No.   | Ret. Time | Height (mAu) | Area (mAu*min) | Rel. Area (%) |
|-------|-----------|--------------|----------------|---------------|
| 1     | 19.990    | 200604       | 8279841        | 49.647        |
| 2     | 22.532    | 185033       | 8397592        | 50.353        |
| Total |           | 385637       | 16677433       | 100.000       |

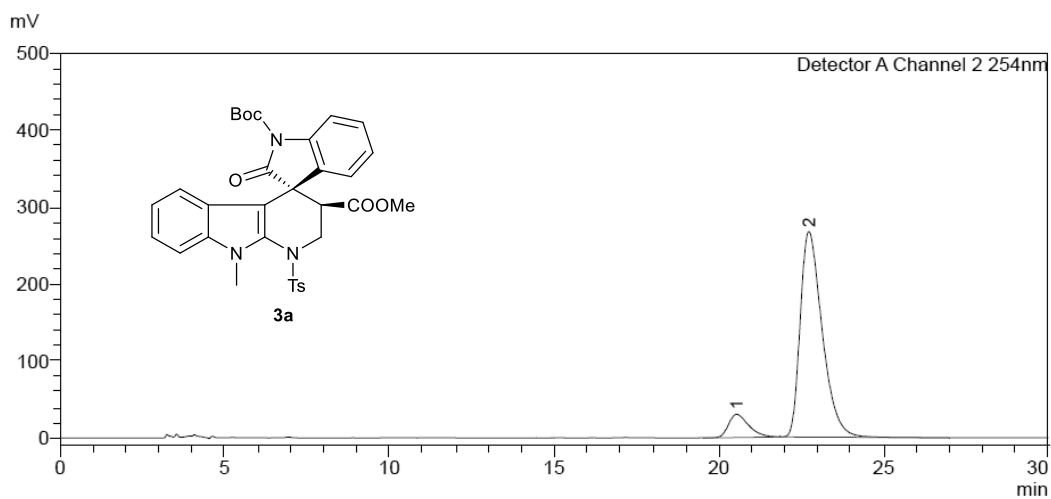

### Peak Analysis Report

Detector A Channel 2 254nm

| No.   | Ret. Time | Height (mAu) | Area (mAu*min) | Rel. Area (%) |
|-------|-----------|--------------|----------------|---------------|
| 1     | 20.539    | 25869        | 902084         | 6.838         |
| 2     | 22.730    | 266584       | 12290576       | 93.162        |
| Total |           | 292453       | 13192660       | 100.00        |

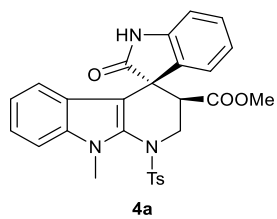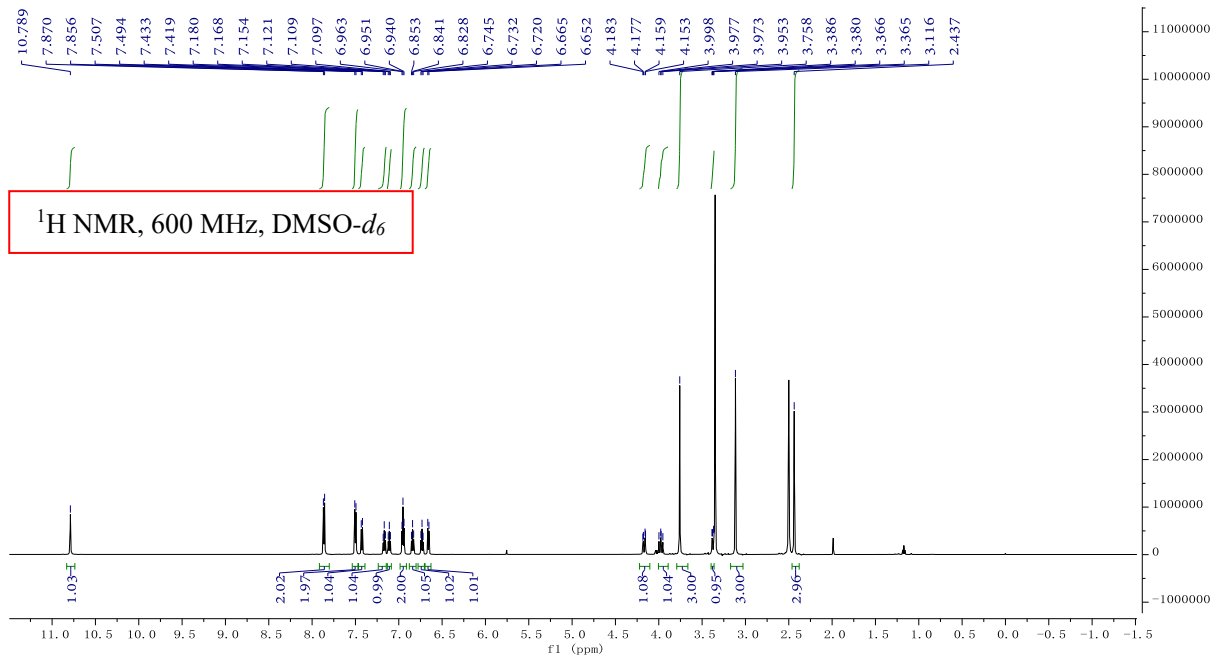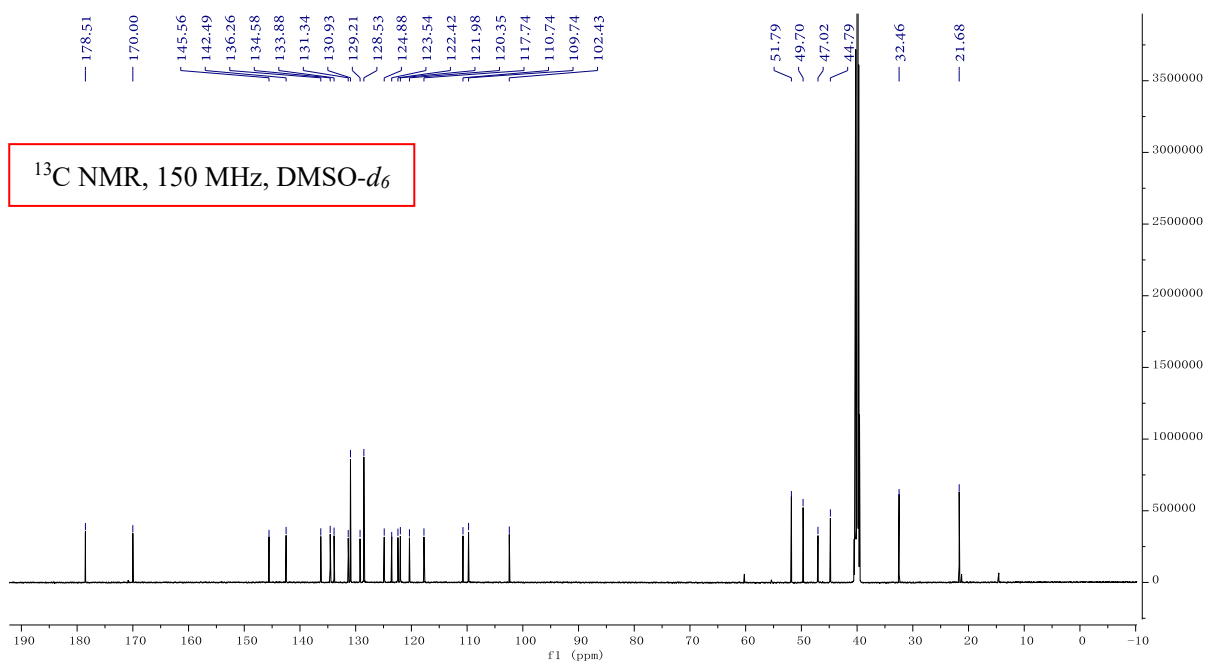

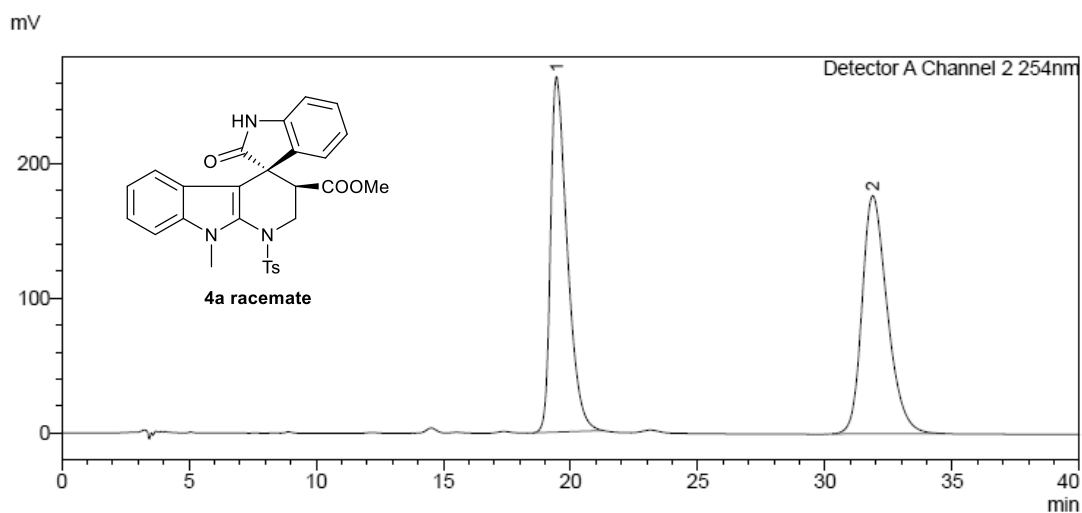

### Peak Analysis Report

Detector A Channel 2 254nm

| No.   | Ret. Time | Height (mAu) | Area (mAu*min) | Rel. Area (%) |
|-------|-----------|--------------|----------------|---------------|
| 1     | 19.447    | 263886       | 12044923       | 49.732        |
| 2     | 31.877    | 176780       | 12174704       | 50.268        |
| Total |           | 440666       | 24219627       | 100.000       |

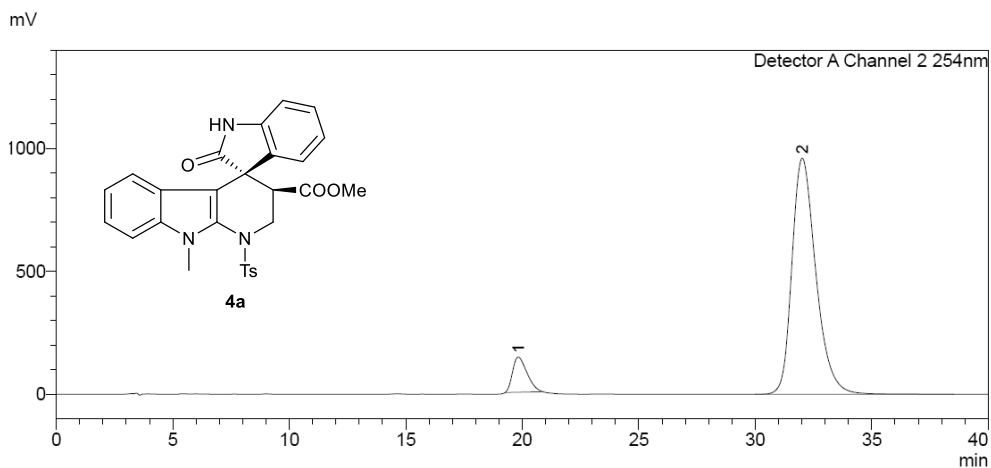

### Peak Analysis Report

Detector A Channel 2 254nm

| No.   | Ret. Time | Height (mAu) | Area (mAu*min) | Rel. Area (%) |
|-------|-----------|--------------|----------------|---------------|
| 1     | 19.827    | 143208       | 6151922        | 8.220         |
| 2     | 32.017    | 961463       | 68693431       | 91.780        |
| Total |           | 1104671      | 74845353       | 100.000       |

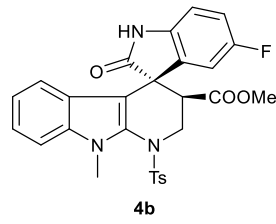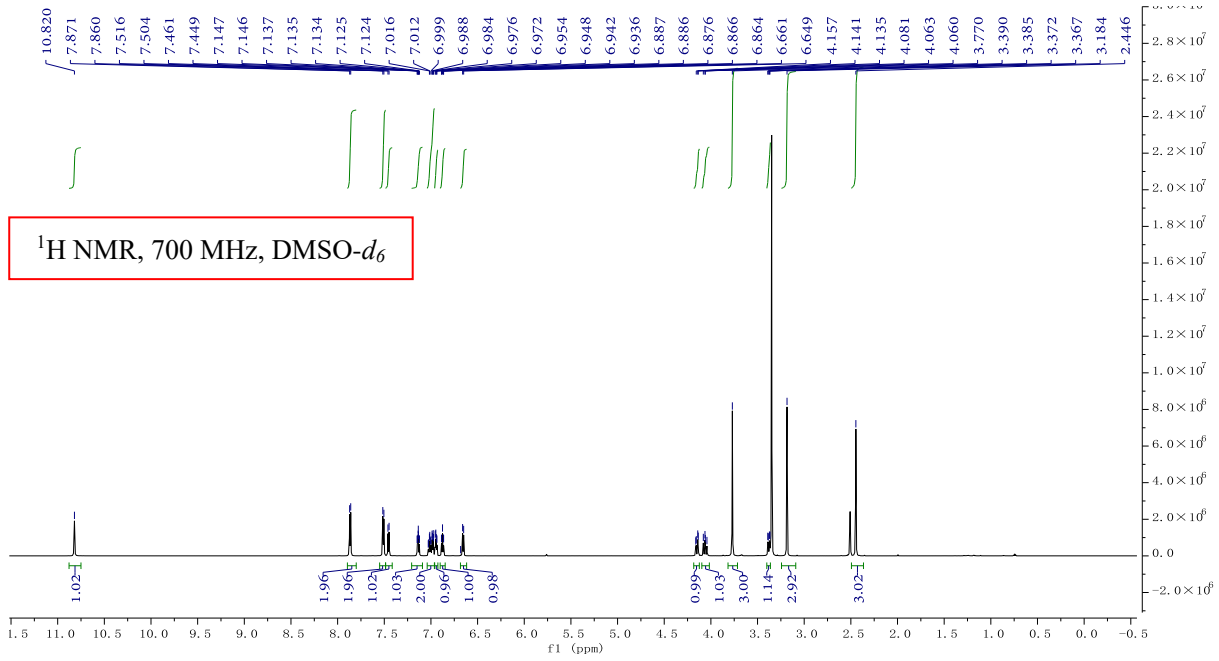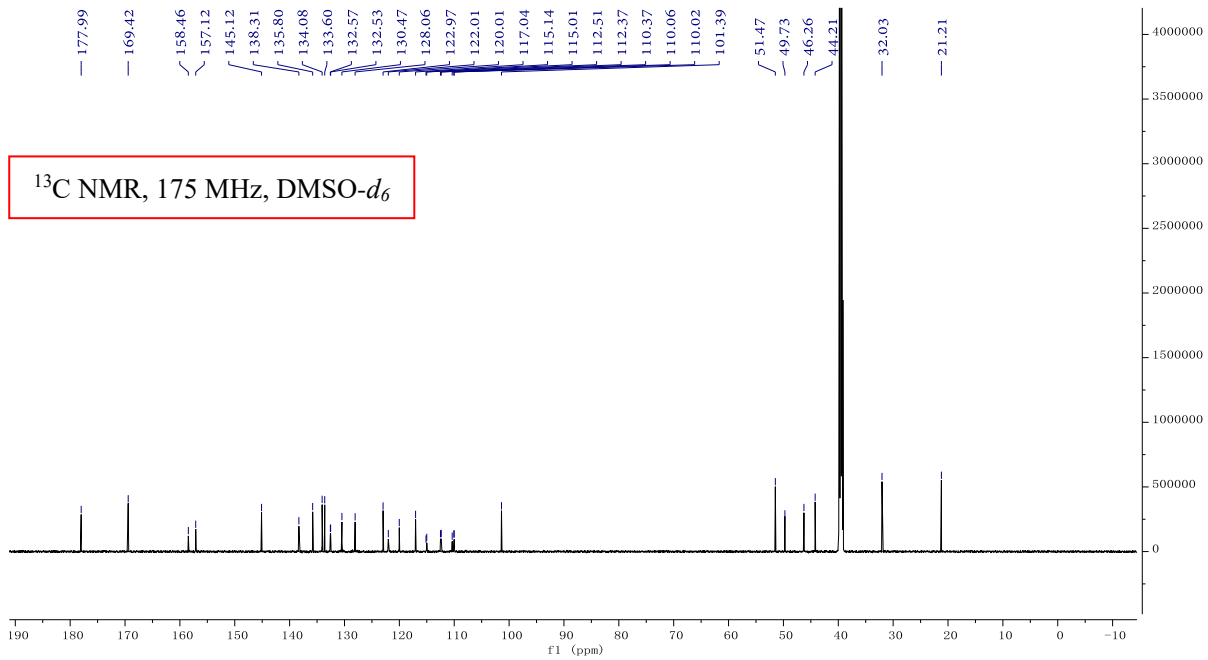



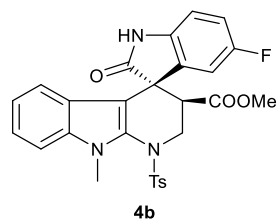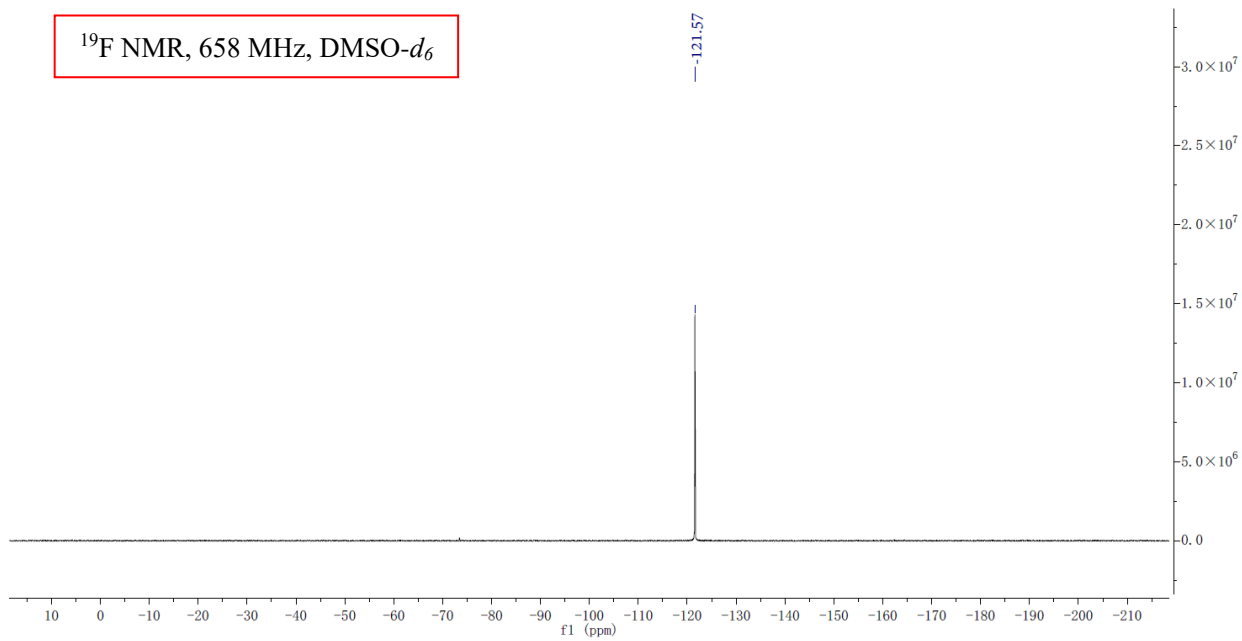

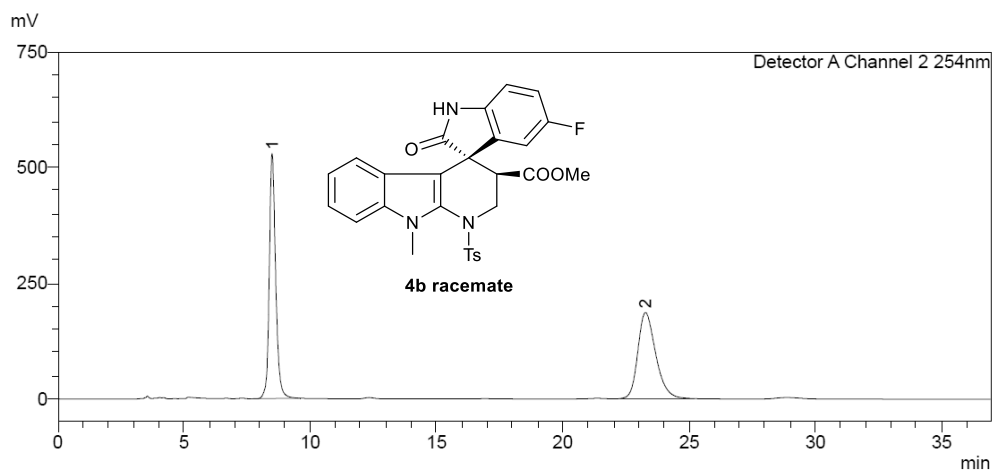

### Peak Analysis Report

Detector A Channel 2 254nm

| No.   | Ret. Time | Height (mAu) | Area (mAu*min) | Rel. Area (%) |
|-------|-----------|--------------|----------------|---------------|
| 1     | 8.491     | 528749       | 9332048        | 50.583        |
| 2     | 23.274    | 185858       | 9117023        | 49.417        |
| Total |           | 714607       | 18449071       | 100.000       |

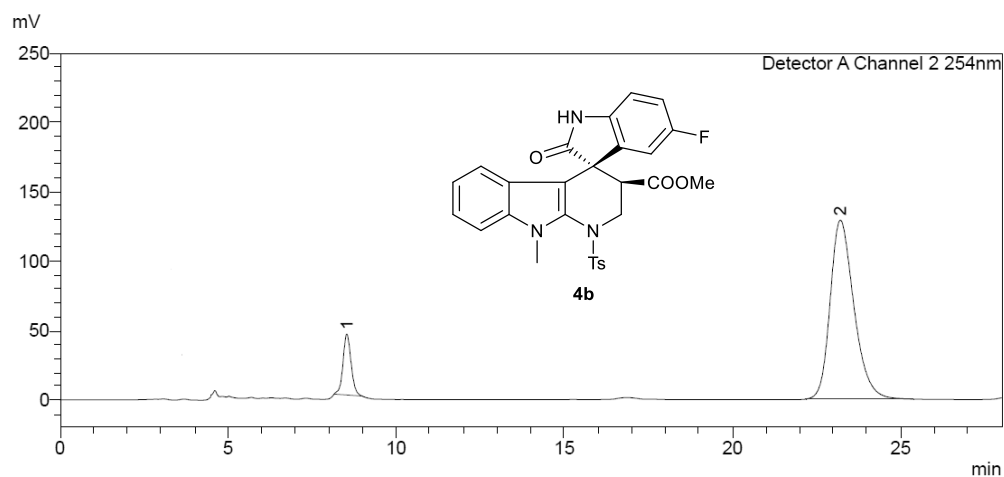

### Peak Analysis Report

Detector A Channel 2 254nm

| No.   | Ret. Time | Height (mAu) | Area (mAu*min) | Rel. Area (%) |
|-------|-----------|--------------|----------------|---------------|
| 1     | 8.535     | 43921        | 738244         | 10.432        |
| 2     | 23.210    | 129101       | 6338574        | 89.568        |
| Total |           | 173022       | 7076819        | 100.000       |

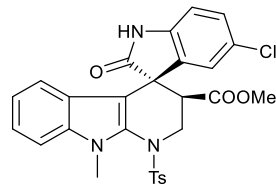

**4c**

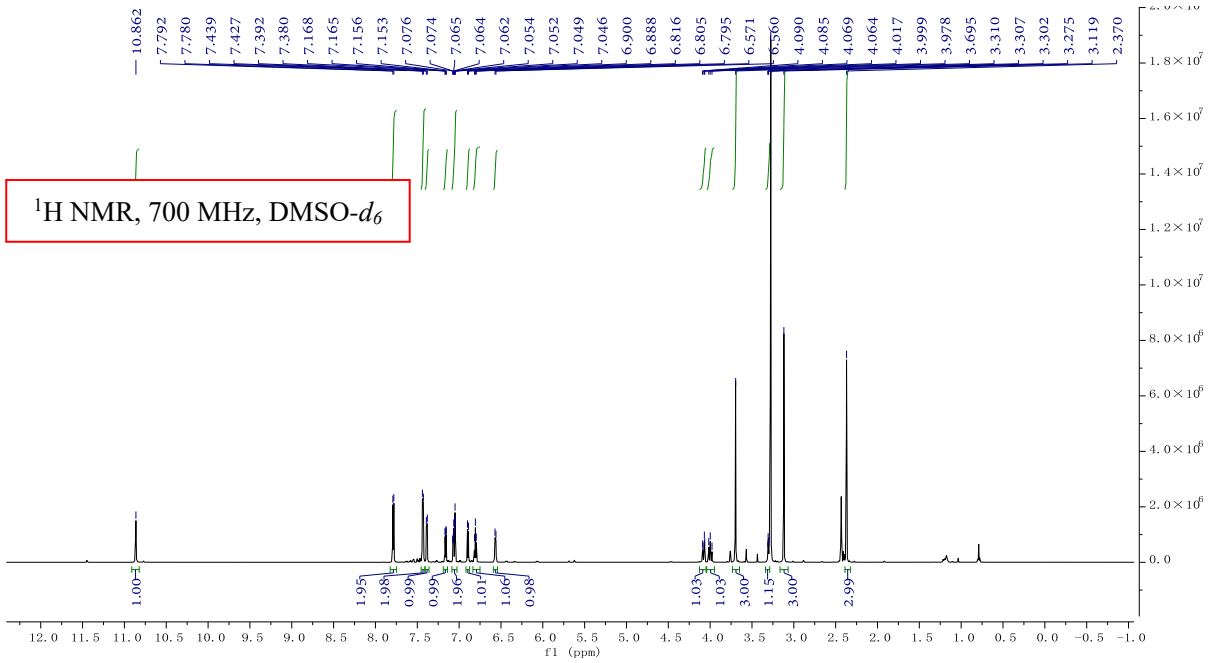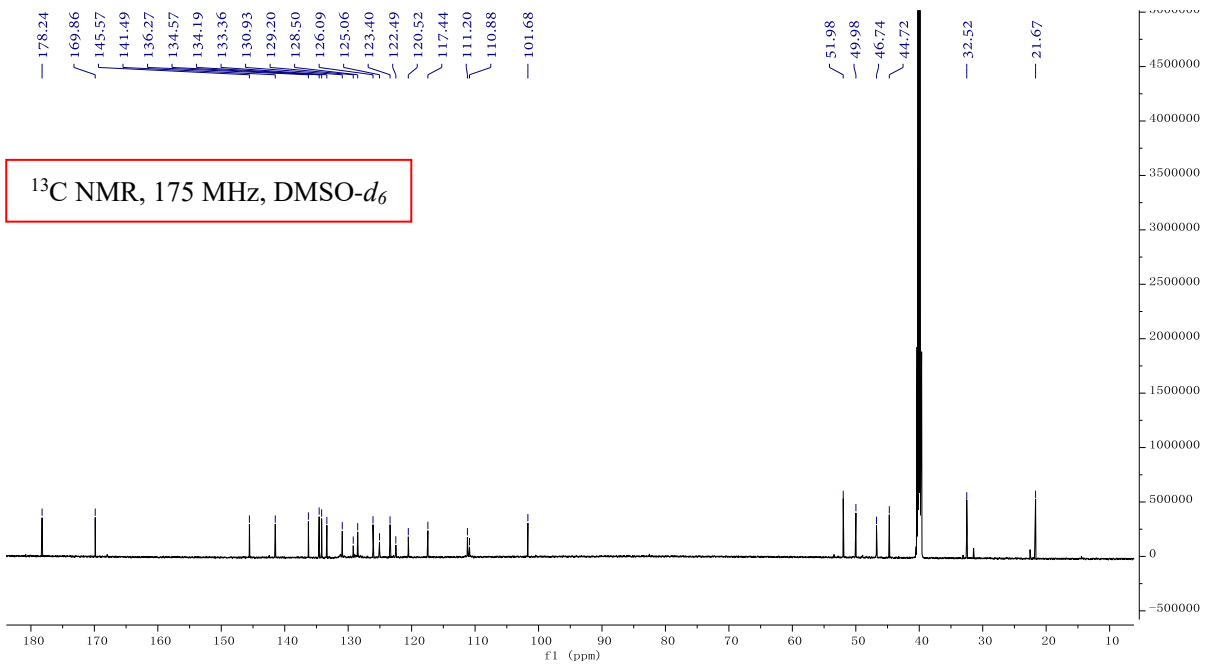

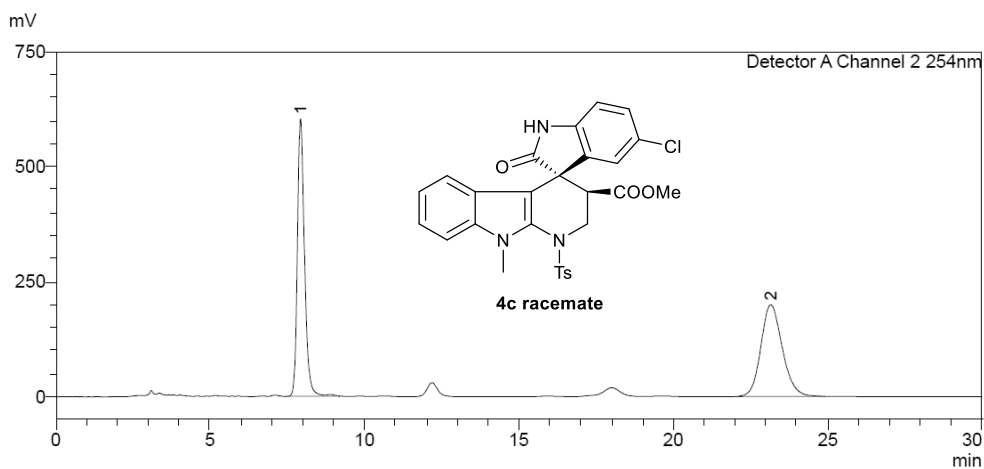

### Peak Analysis Report

Detector A Channel 2 254nm

| No.   | Ret. Time | Height (mAu) | Area (mAu*min) | Rel. Area (%) |
|-------|-----------|--------------|----------------|---------------|
| 1     | 7.930     | 602765       | 9693426        | 50.269        |
| 2     | 23.154    | 199301       | 9589829        | 49.731        |
| Total |           | 802066       | 19283255       | 100.000       |

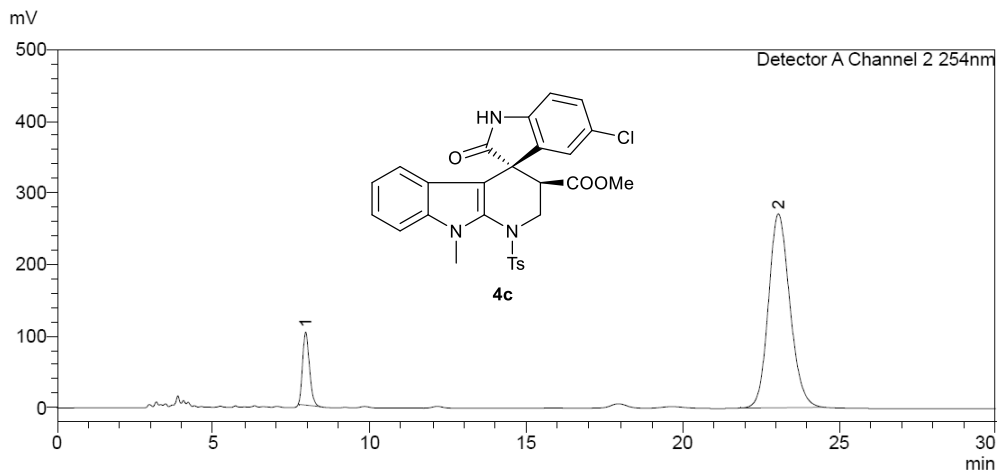

### Peak Analysis Report

Detector A Channel 2 254nm

| No.   | Ret. Time | Height (mAu) | Area (mAu*min) | Rel. Area (%) |
|-------|-----------|--------------|----------------|---------------|
| 1     | 7.953     | 101668       | 1542757        | 10.695        |
| 2     | 23.059    | 270140       | 12882223       | 89.305        |
| Total |           | 371808       | 14424980       | 100.000       |

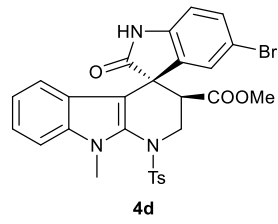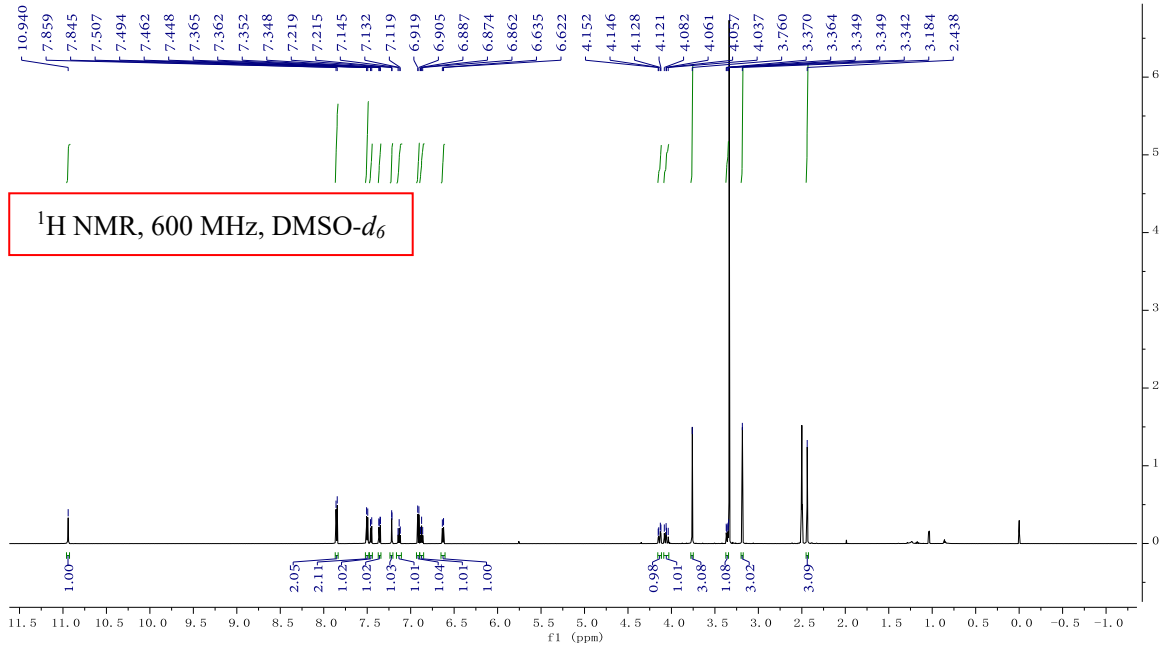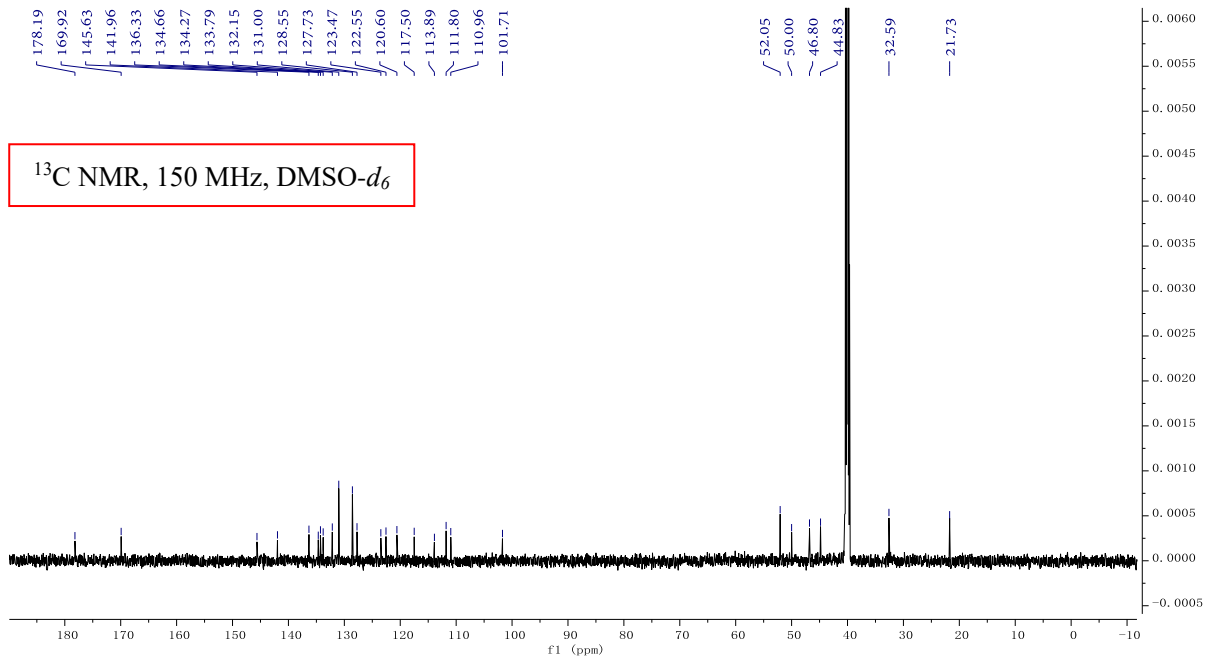

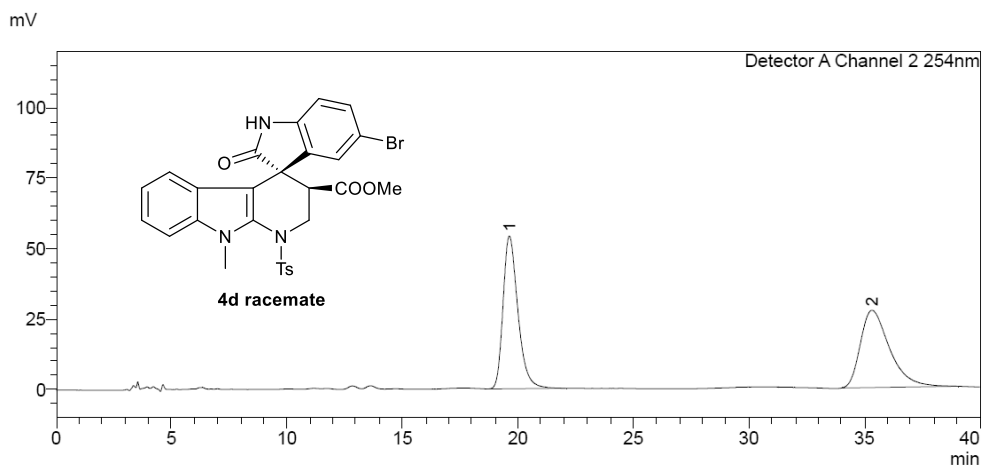

### Peak Analysis Report

Detector A Channel 2 254nm

| No.   | Ret. Time | Height (mAu) | Area (mAu*min) | Rel. Area (%) |
|-------|-----------|--------------|----------------|---------------|
| 1     | 19.635    | 54060        | 2414371        | 50.049        |
| 2     | 35.342    | 27359        | 2409669        | 49.951        |
| Total |           | 81420        | 4824040        | 100.000       |

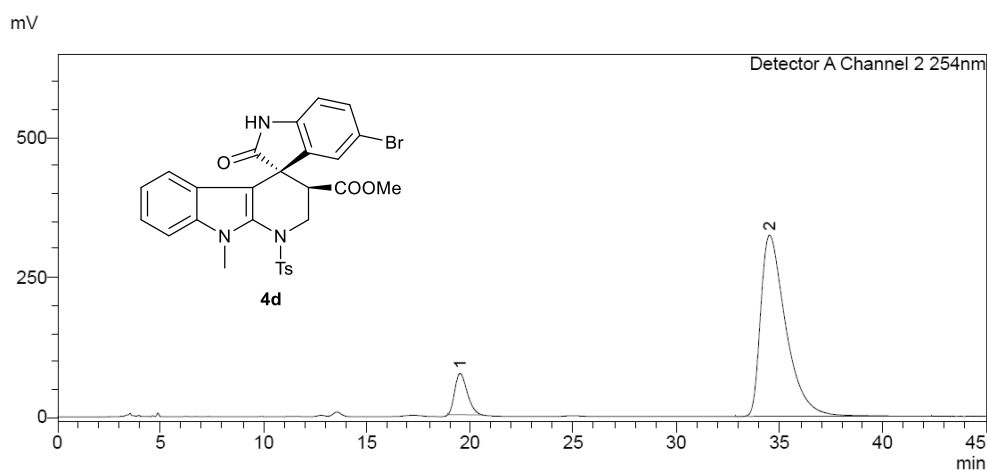

### Peak Analysis Report

Detector A Channel 2 254nm

| No.   | Ret. Time | Height (mAu) | Area (mAu*min) | Rel. Area (%) |
|-------|-----------|--------------|----------------|---------------|
| 1     | 19.523    | 74005        | 3119485        | 10.185        |
| 2     | 34.523    | 324506       | 27509592       | 89.815        |
| Total |           | 398511       | 30629076       | 100.000       |

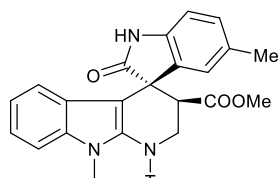

4e

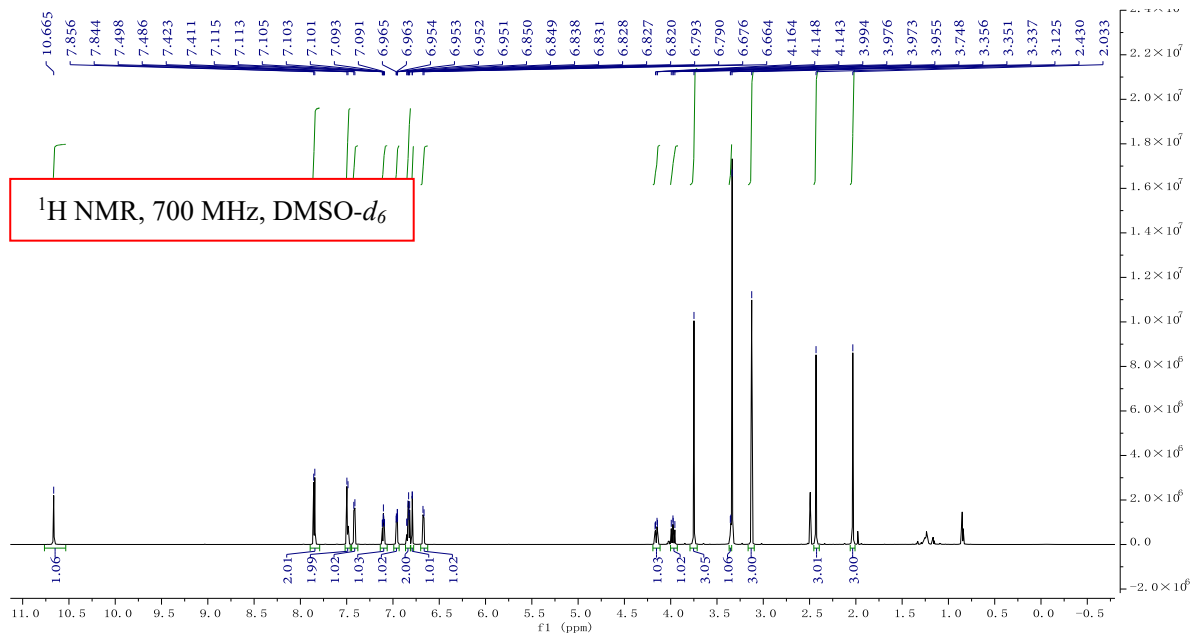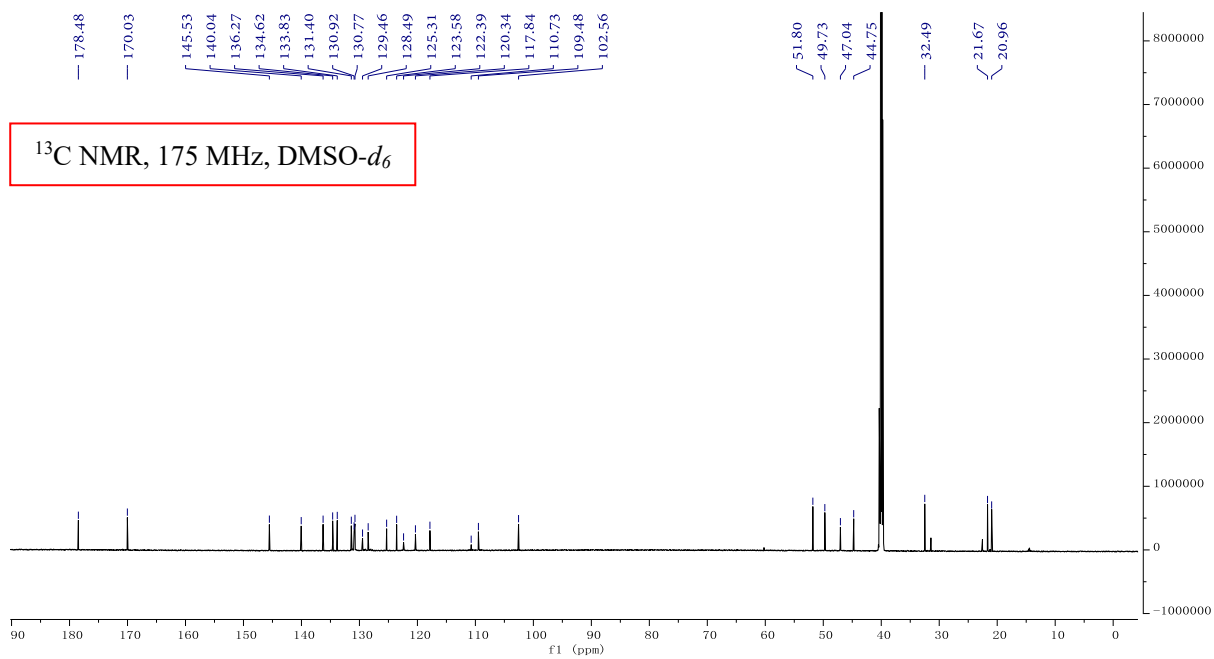

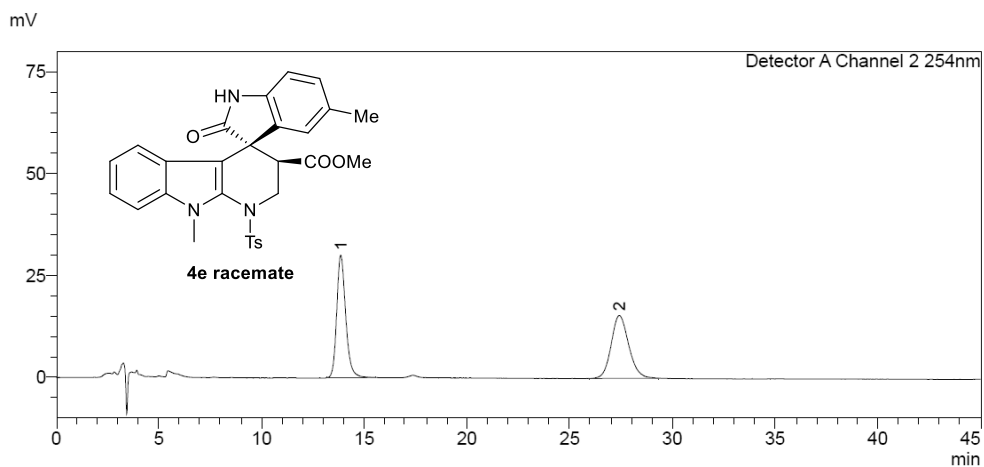

### Peak Analysis Report

Detector A Channel 2 254nm

| No.   | Ret. Time | Height (mAu) | Area (mAu*min) | Rel. Area (%) |
|-------|-----------|--------------|----------------|---------------|
| 1     | 13.858    | 30052        | 912642         | 50.032        |
| 2     | 27.422    | 15398        | 911479         | 49.968        |
| Total |           | 45450        | 1824121        | 100.000       |

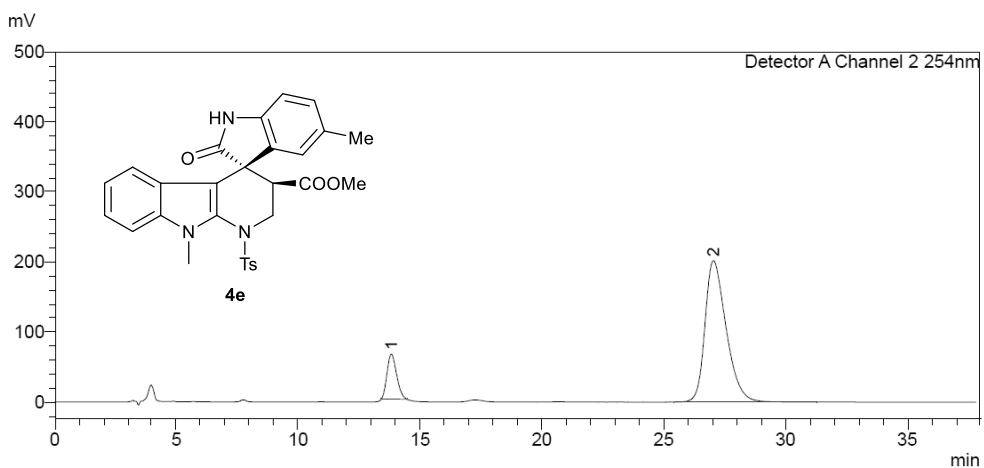

### Peak Analysis Report

Detector A Channel 2 254nm

| No.   | Ret. Time | Height (mAu) | Area (mAu*min) | Rel. Area (%) |
|-------|-----------|--------------|----------------|---------------|
| 1     | 13.823    | 64052        | 1751166        | 12.559        |
| 2     | 27.047    | 201736       | 12192562       | 87.441        |
| Total |           | 265788       | 13943728       | 100.000       |



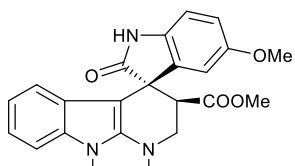

**4f**

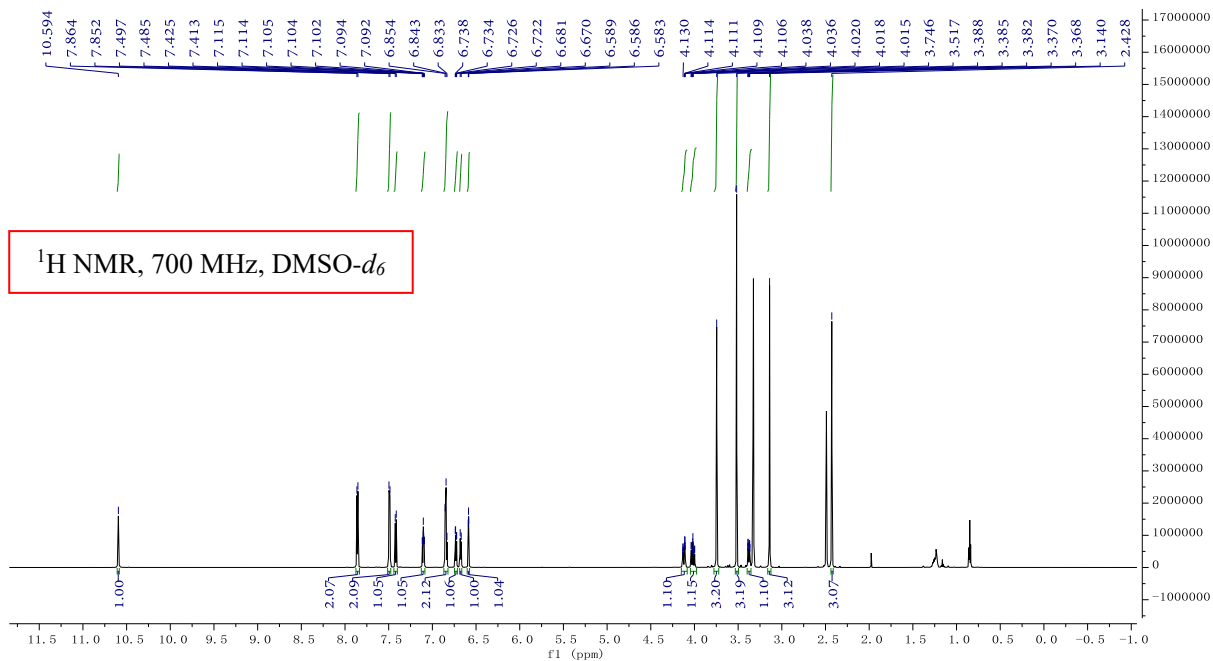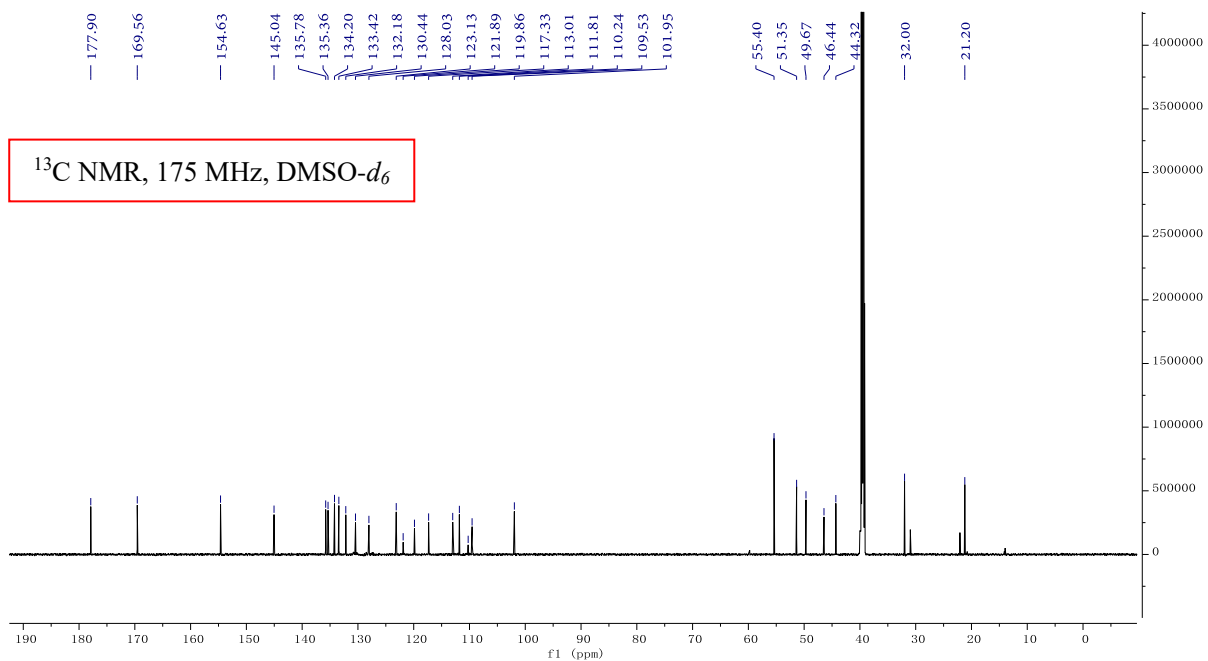

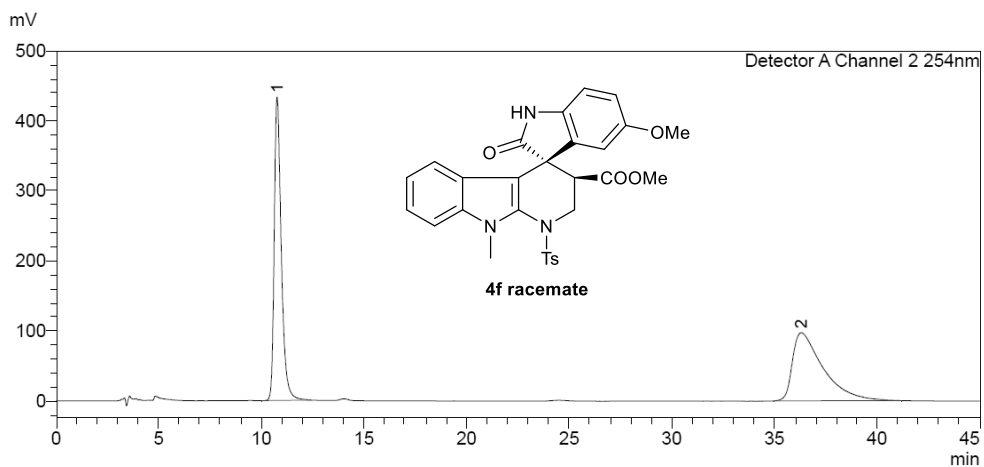

### Peak Analysis Report

Detector A Channel 2 254nm

| No.   | Ret. Time | Height (mAu) | Area (mAu*min) | Rel. Area (%) |
|-------|-----------|--------------|----------------|---------------|
| 1     | 10.773    | 432753       | 10337899       | 50.635        |
| 2     | 36.308    | 97294        | 10078628       | 49.365        |
| Total |           | 530047       | 20416526       | 100.000       |

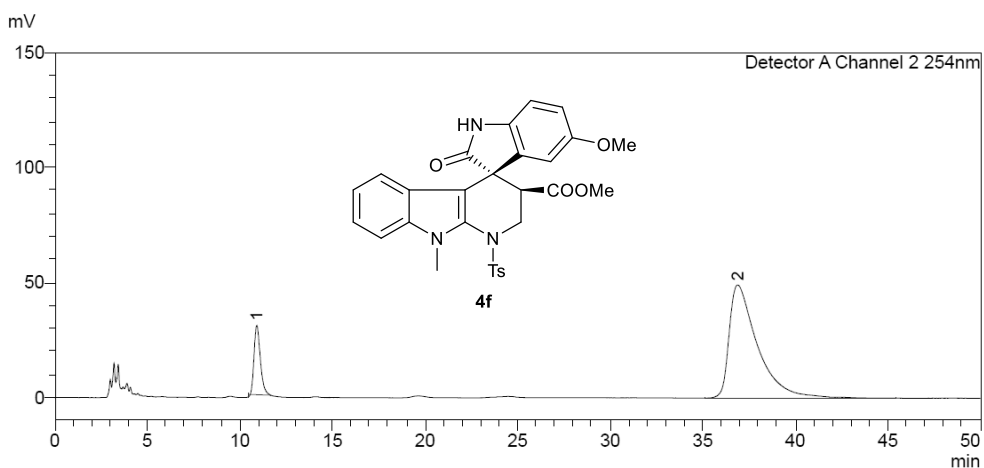

### Peak Analysis Report

Detector A Channel 2 254nm

| No.   | Ret. Time | Height (mAu) | Area (mAu*min) | Rel. Area (%) |
|-------|-----------|--------------|----------------|---------------|
| 1     | 10.922    | 30117        | 710330         | 11.969        |
| 2     | 36.894    | 49172        | 5224595        | 88.031        |
| Total |           | 79289        | 5934925        | 100.000       |

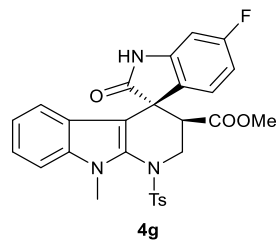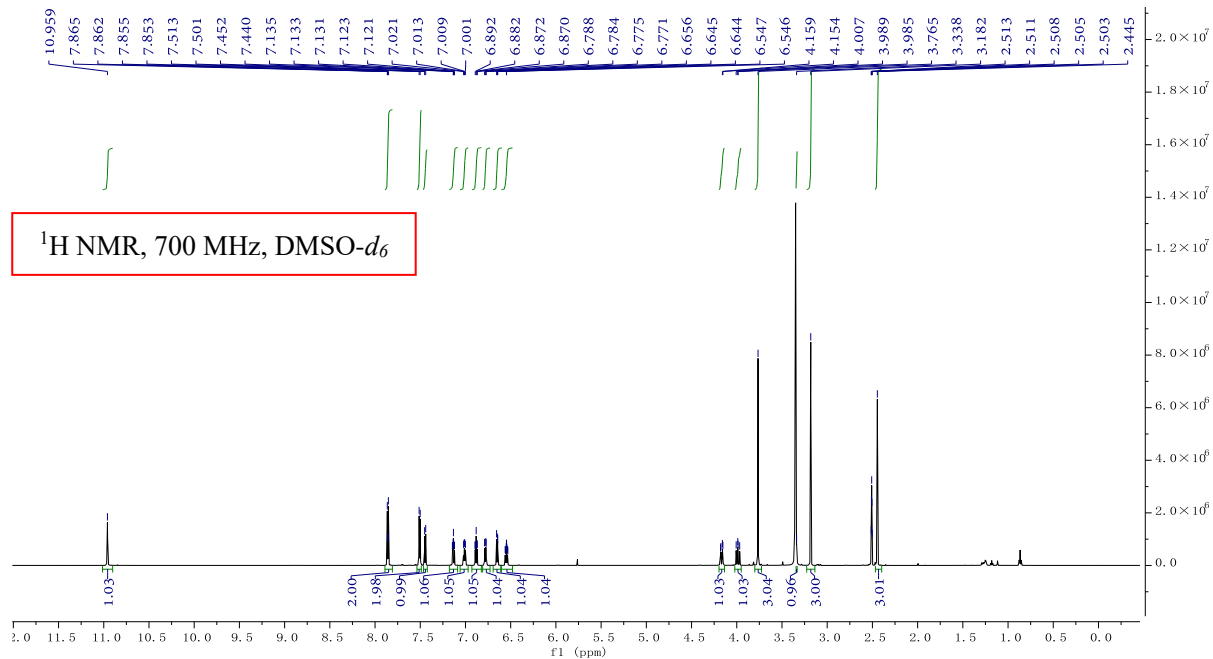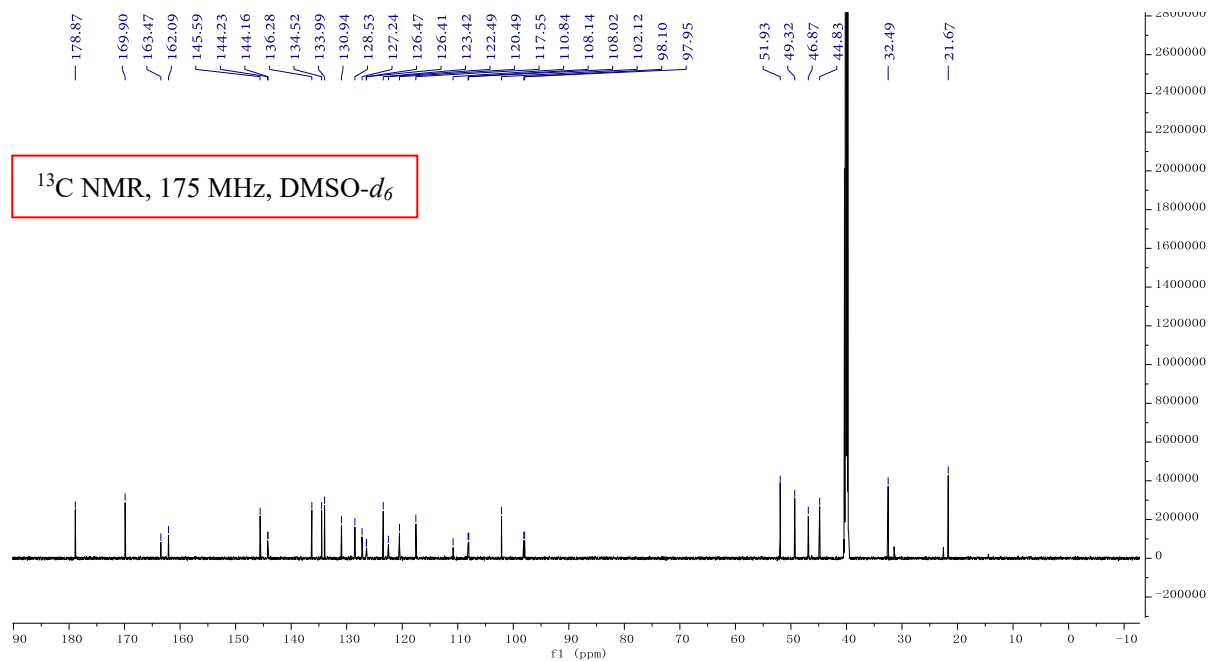

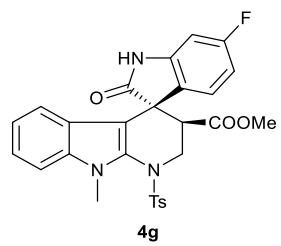

$^{19}\text{F}$  NMR, 658 MHz,  $\text{DMSO-}d_6$

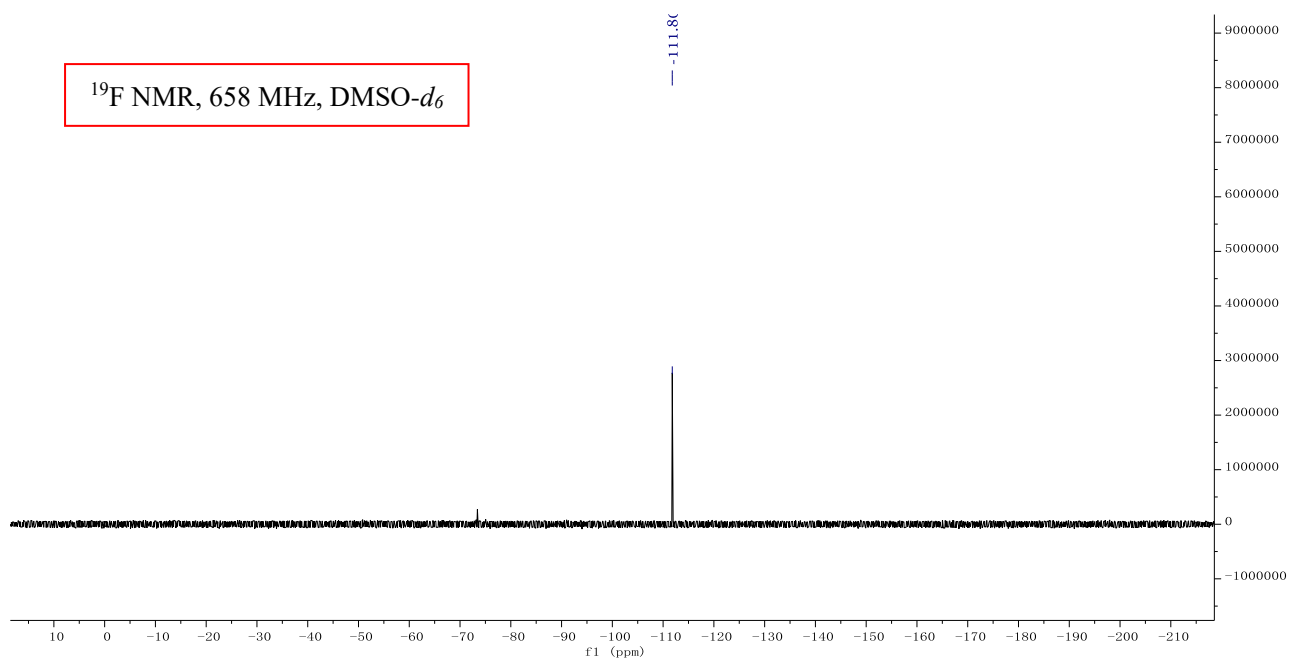

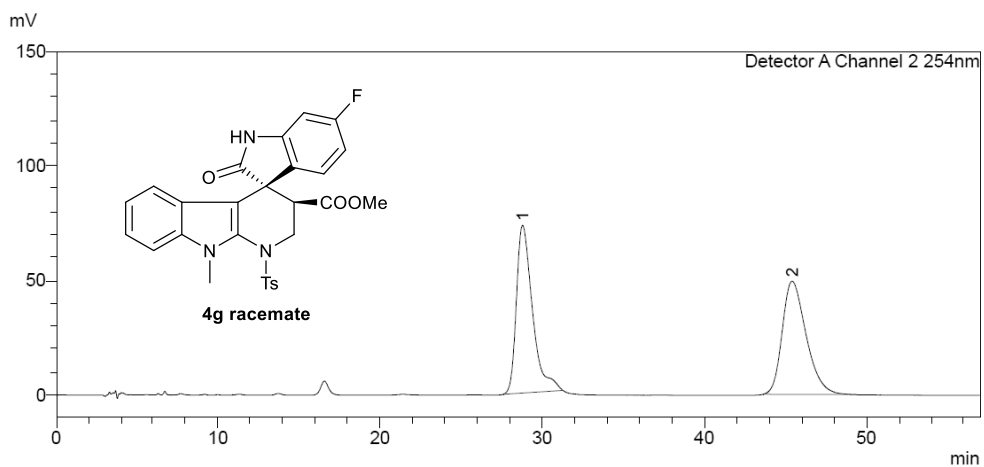

### Peak Analysis Report

Detector A Channel 2 254nm

| No.   | Ret. Time | Height (mAu) | Area (mAu*min) | Rel. Area (%) |
|-------|-----------|--------------|----------------|---------------|
| 1     | 28.794    | 73223        | 5059270        | 49.918        |
| 2     | 45.428    | 49440        | 5075886        | 50.082        |
| Total |           | 122663       | 10135156       | 100.000       |

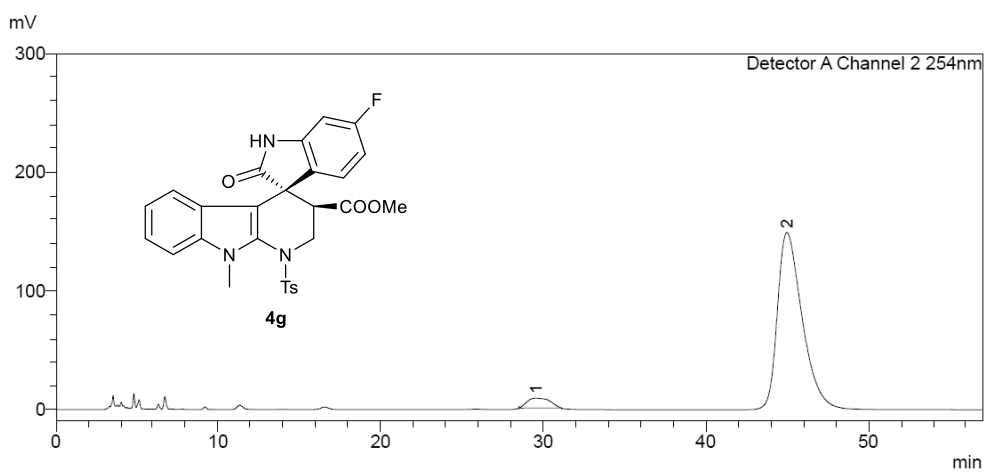

### Peak Analysis Report

Detector A Channel 2 254nm

| No.   | Ret. Time | Height (mAu) | Area (mAu*min) | Rel. Area (%) |
|-------|-----------|--------------|----------------|---------------|
| 1     | 29.554    | 8333         | 816749         | 4.869         |
| 2     | 44.998    | 149327       | 15958786       | 95.131        |
| Total |           | 157660       | 16775534       | 100.000       |

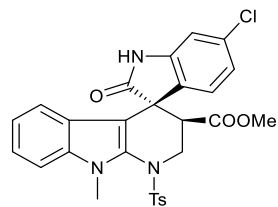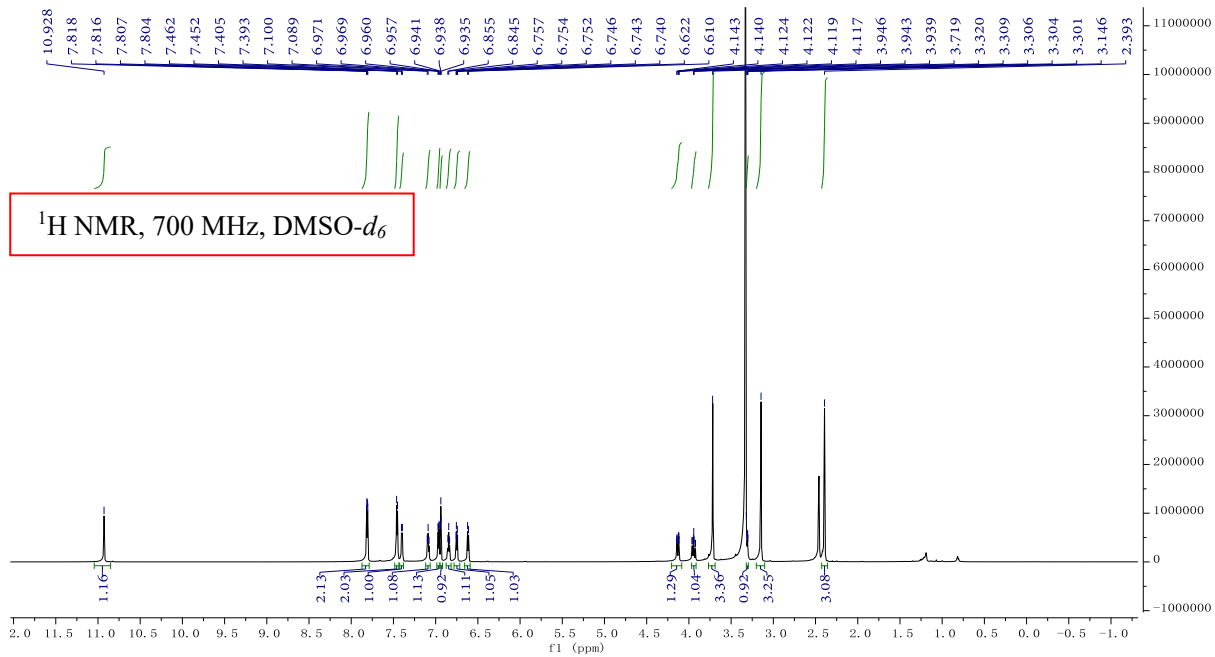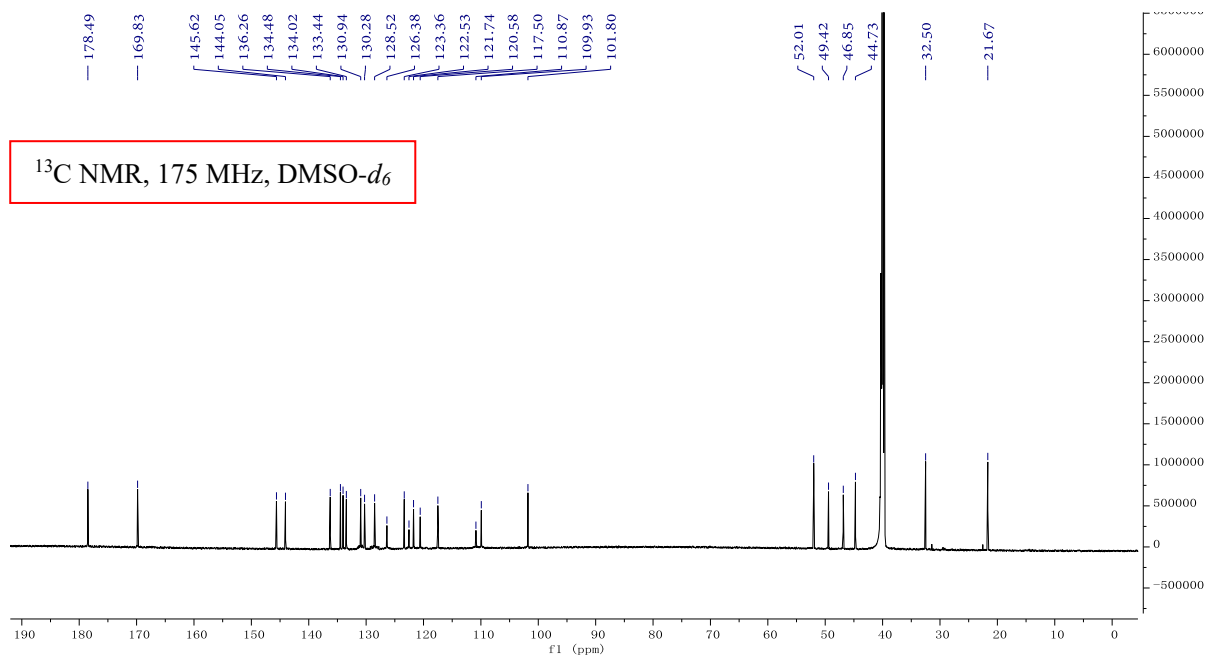

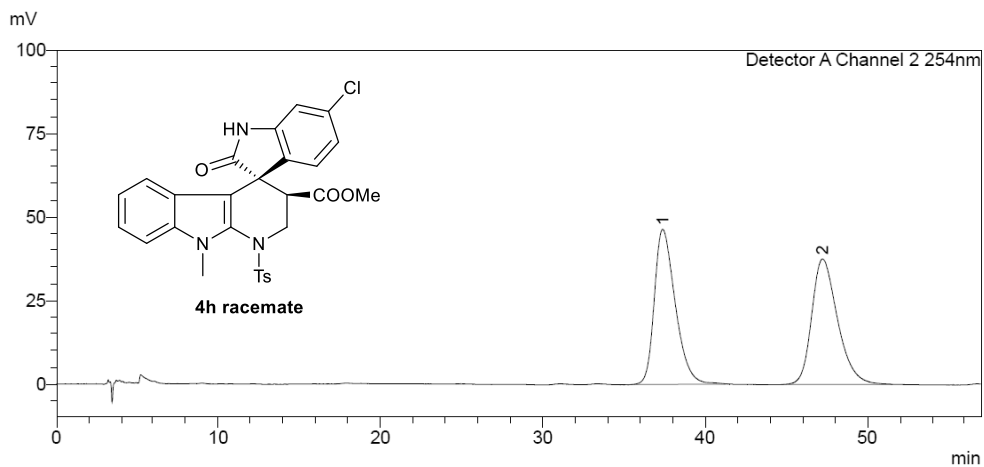

### Peak Analysis Report

| Detector A Channel 2 254nm |           |              |                |               |
|----------------------------|-----------|--------------|----------------|---------------|
| No.                        | Ret. Time | Height (mAu) | Area (mAu*min) | Rel. Area (%) |
| 1                          | 37.392    | 46431        | 4171393        | 50.106        |
| 2                          | 47.252    | 37527        | 4153792        | 49.894        |
| Total                      |           | 83959        | 8325185        | 100.000       |

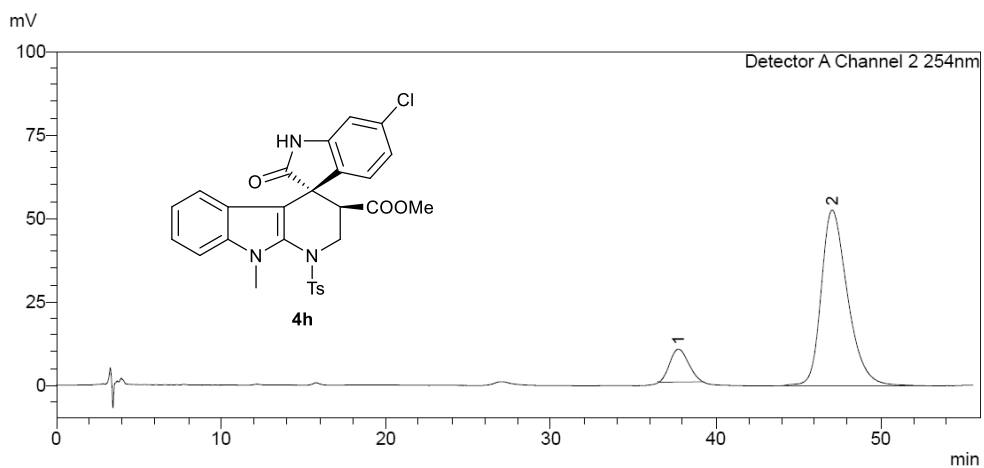

### Peak Analysis Report

| Detector A Channel 2 254nm |           |              |                |               |
|----------------------------|-----------|--------------|----------------|---------------|
| No.                        | Ret. Time | Height (mAu) | Area (mAu*min) | Rel. Area (%) |
| 1                          | 37.734    | 9921         | 778510         | 11.724        |
| 2                          | 47.060    | 52648        | 5861764        | 88.276        |
| Total                      |           | 62568        | 6640274        | 100.000       |

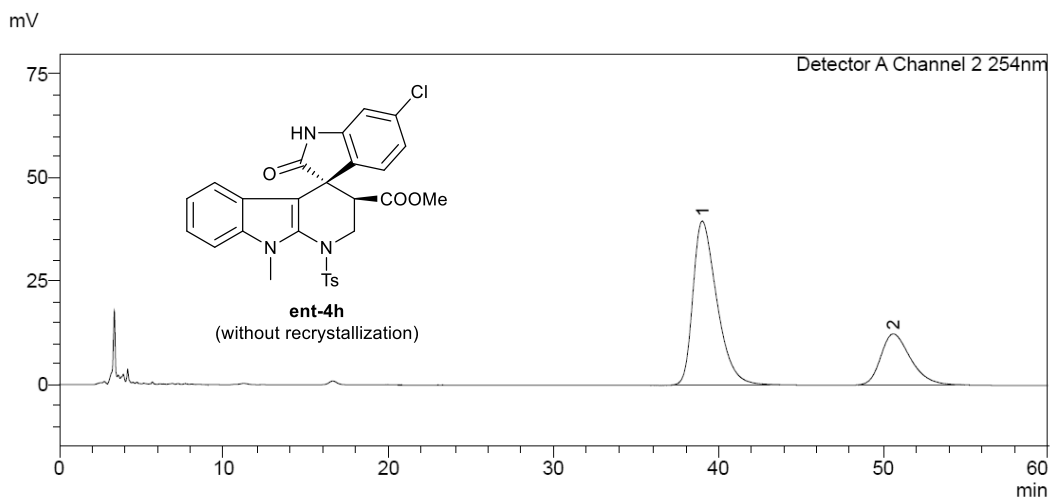

### Peak Analysis Report

Detector A Channel 2 254nm

| No.   | Ret. Time | Height (mAu) | Area (mAu*min) | Rel. Area (%) |
|-------|-----------|--------------|----------------|---------------|
| 1     | 39.024    | 39623        | 3992585        | 71.961        |
| 2     | 50.600    | 12377        | 1555690        | 28.039        |
| Total |           | 52000        | 5548275        | 100.000       |

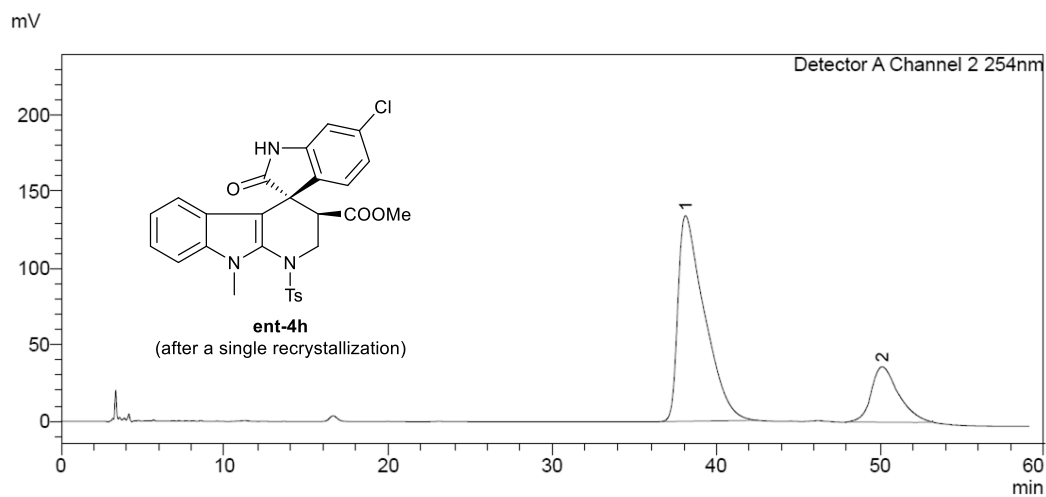

### Peak Analysis Report

Detector A Channel 2 254nm

| No.   | Ret. Time | Height (mAu) | Area (mAu*min) | Rel. Area (%) |
|-------|-----------|--------------|----------------|---------------|
| 1     | 38.127    | 134271       | 15130694       | 81.194        |
| 2     | 50.299    | 34781        | 3504592        | 18.806        |
| Total |           | 169052       | 18635286       | 100.000       |



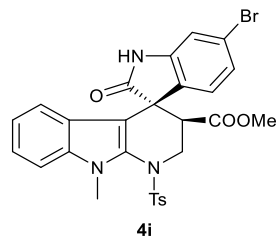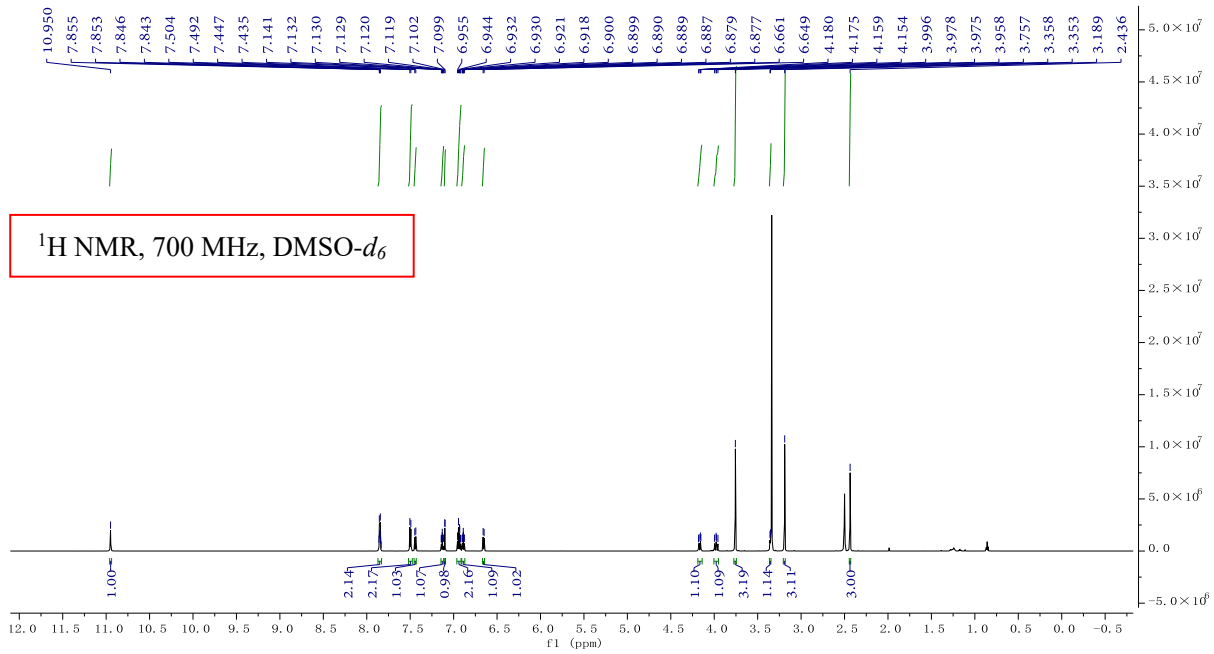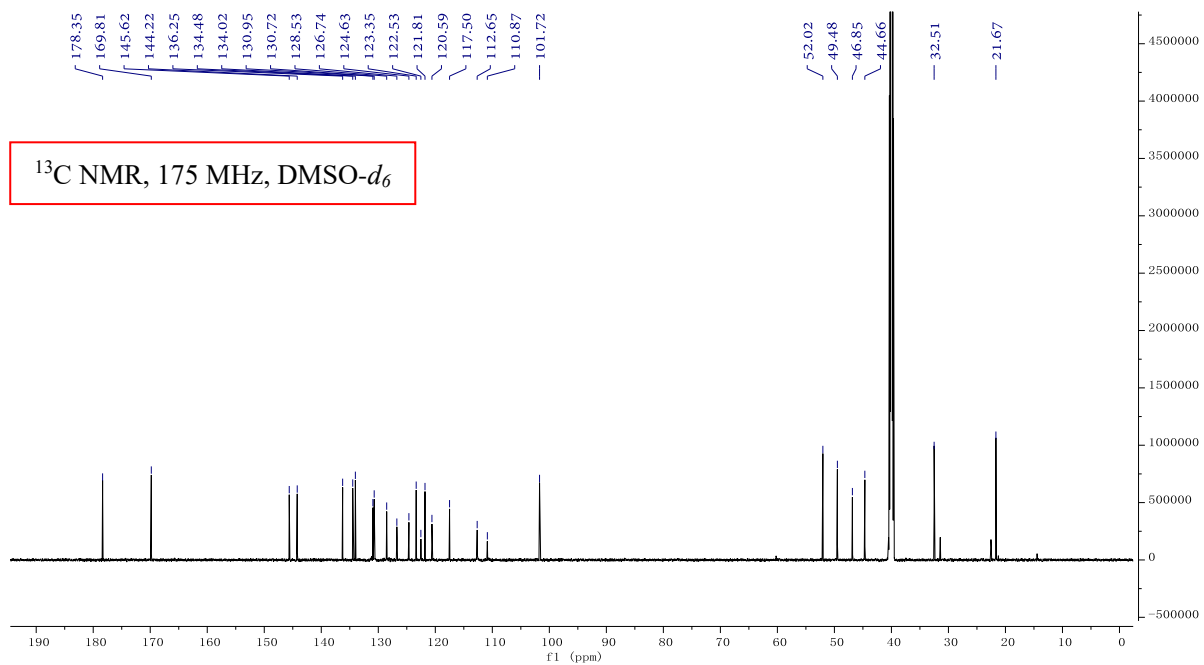

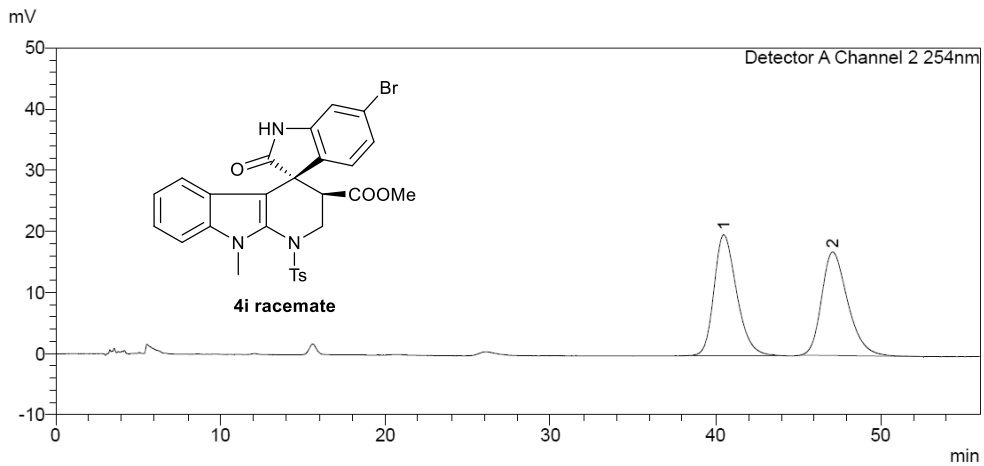

### Peak Analysis Report

Detector A Channel 2 254nm

| No.   | Ret. Time | Height (mAu) | Area (mAu*min) | Rel. Area (%) |
|-------|-----------|--------------|----------------|---------------|
| 1     | 40.505    | 19681        | 1873612        | 50.183        |
| 2     | 47.093    | 16874        | 1859940        | 49.817        |
| Total |           | 36555        | 3733553        | 100.000       |

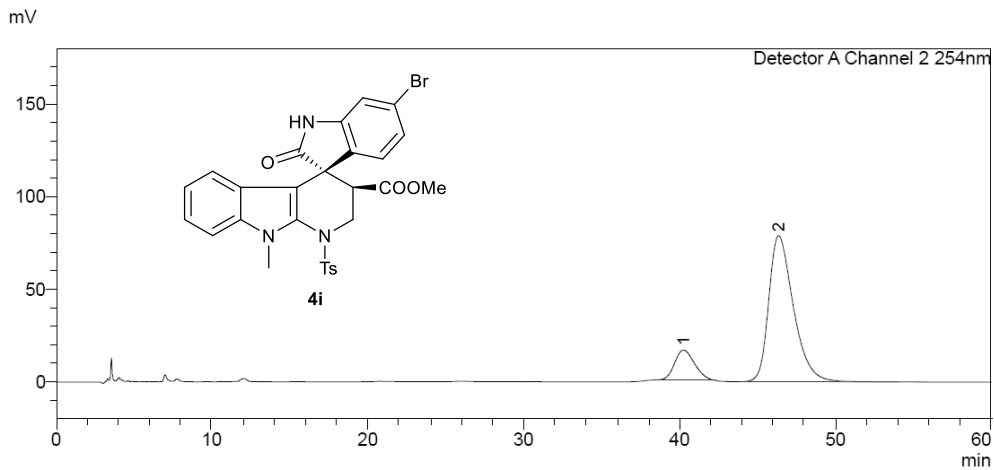

### Peak Analysis Report

Detector A Channel 2 254nm

| No.   | Ret. Time | Height (mAu) | Area (mAu*min) | Rel. Area (%) |
|-------|-----------|--------------|----------------|---------------|
| 1     | 40.256    | 16214        | 1442166        | 14.266        |
| 2     | 46.353    | 78751        | 8667119        | 85.734        |
| Total |           | 94965        | 10109285       | 100.000       |

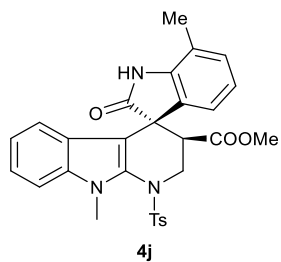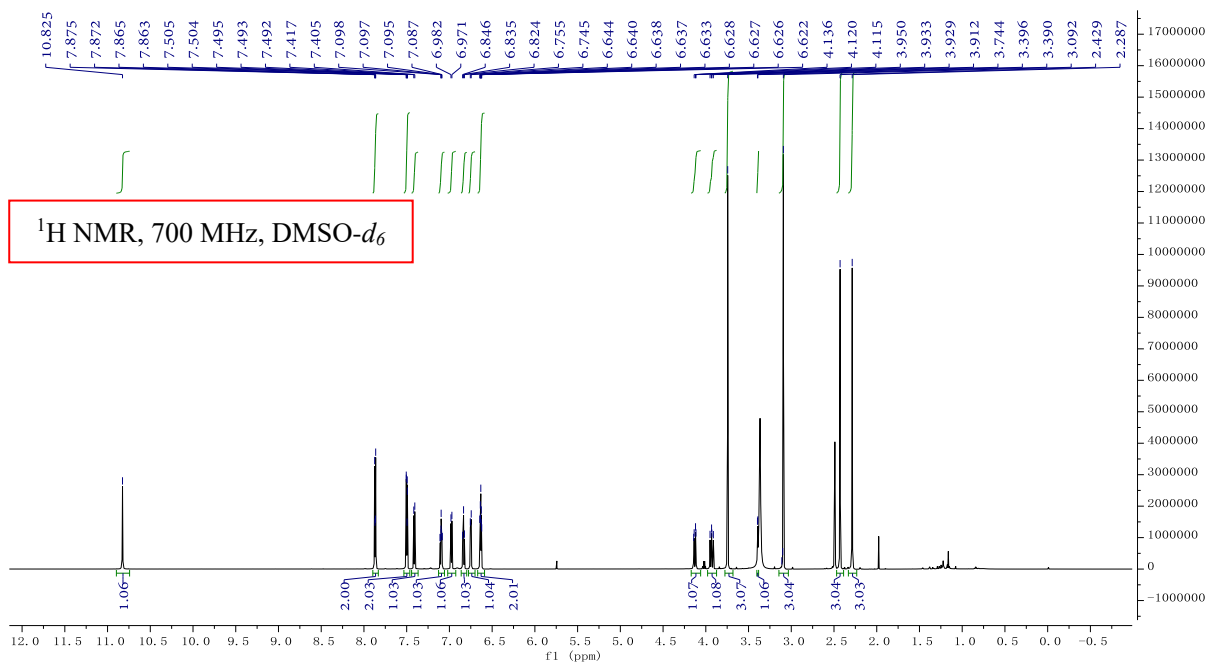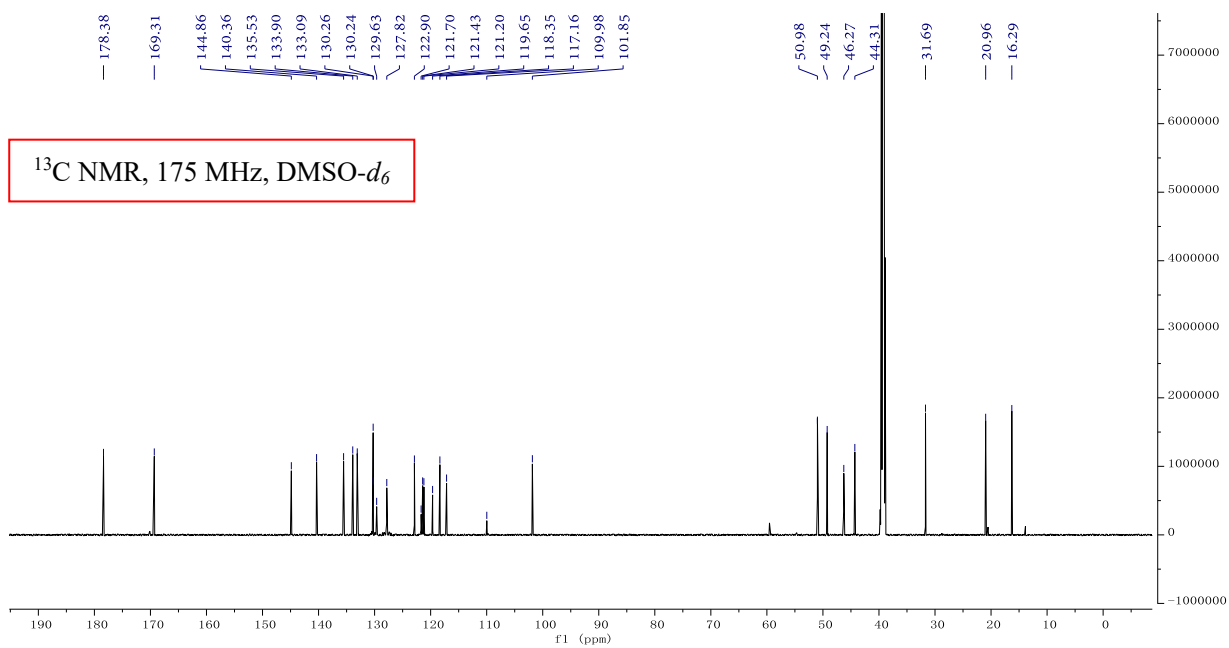

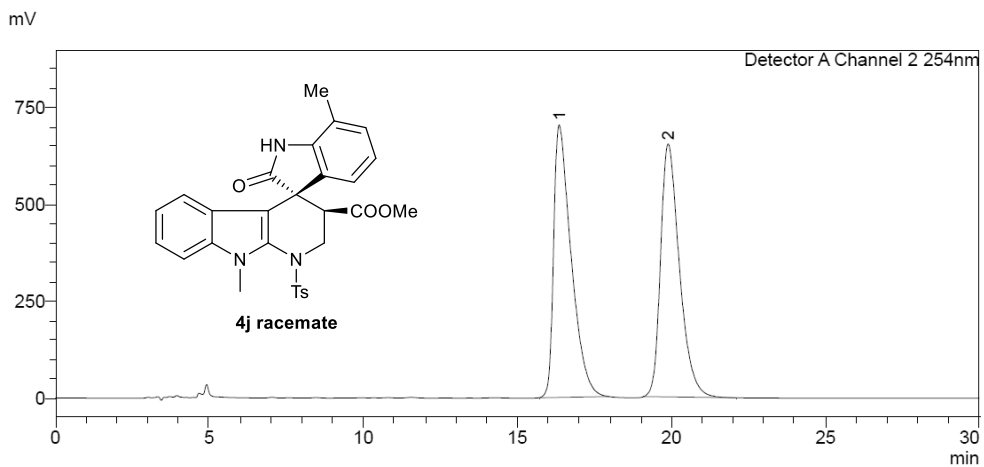

### Peak Analysis Report

Detector A Channel 2 254nm

| No.   | Ret. Time | Height (mAu) | Area (mAu*min) | Rel. Area (%) |
|-------|-----------|--------------|----------------|---------------|
| 1     | 16.357    | 703763       | 27778193       | 49.945        |
| 2     | 19.894    | 653327       | 27839306       | 50.055        |
| Total |           | 1357090      | 55617499       | 100.000       |

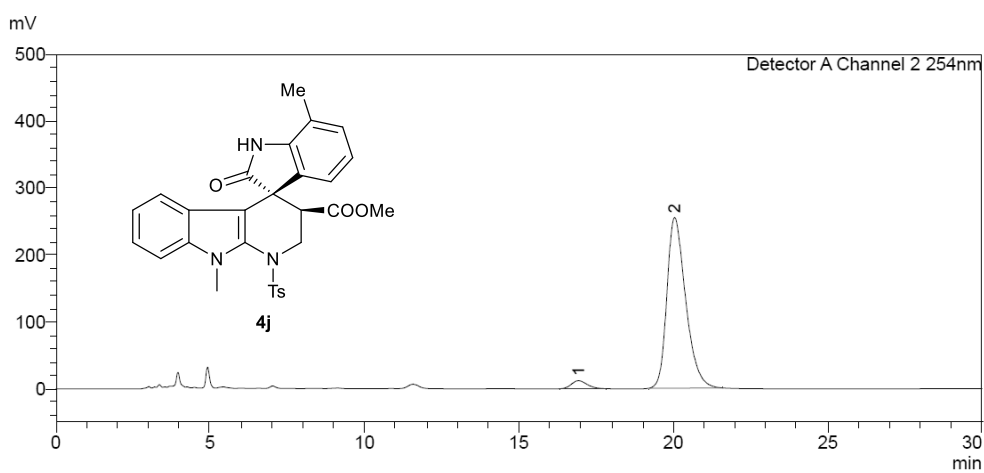

### Peak Analysis Report

Detector A Channel 2 254nm

| No.   | Ret. Time | Height (mAu) | Area (mAu*min) | Rel. Area (%) |
|-------|-----------|--------------|----------------|---------------|
| 1     | 16.930    | 12067        | 429846         | 3.843         |
| 2     | 20.042    | 254555       | 10755694       | 96.157        |
| Total |           | 266621       | 11185540       | 100.000       |

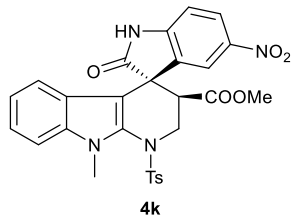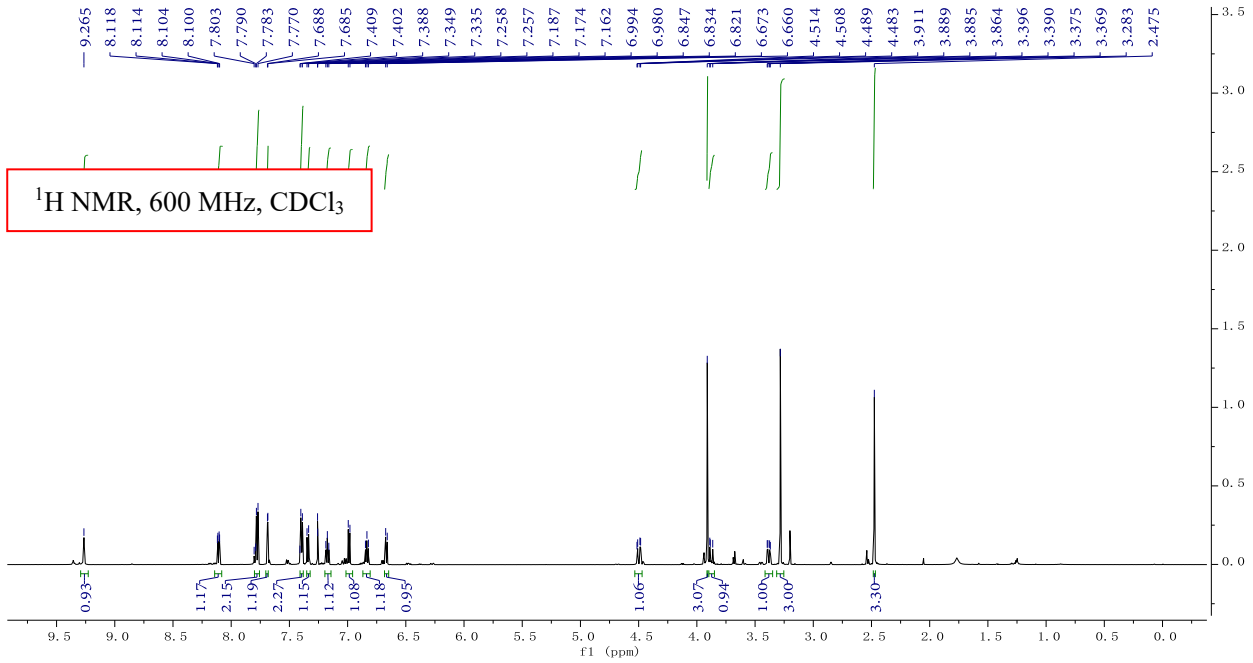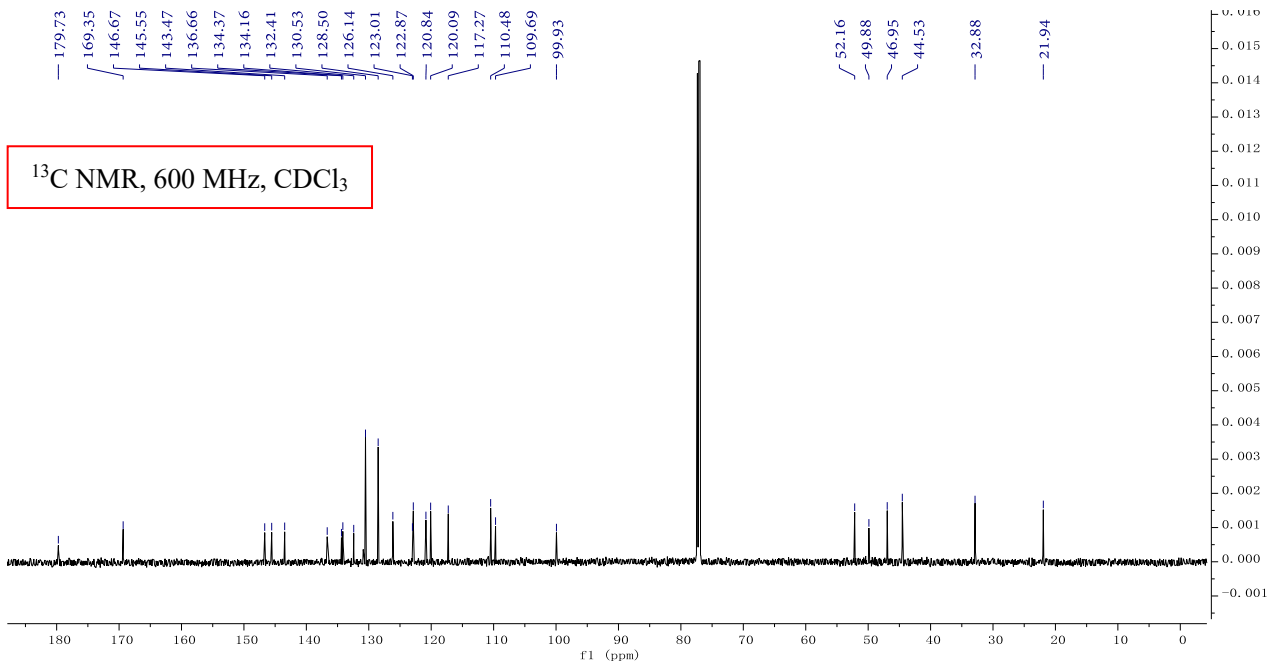

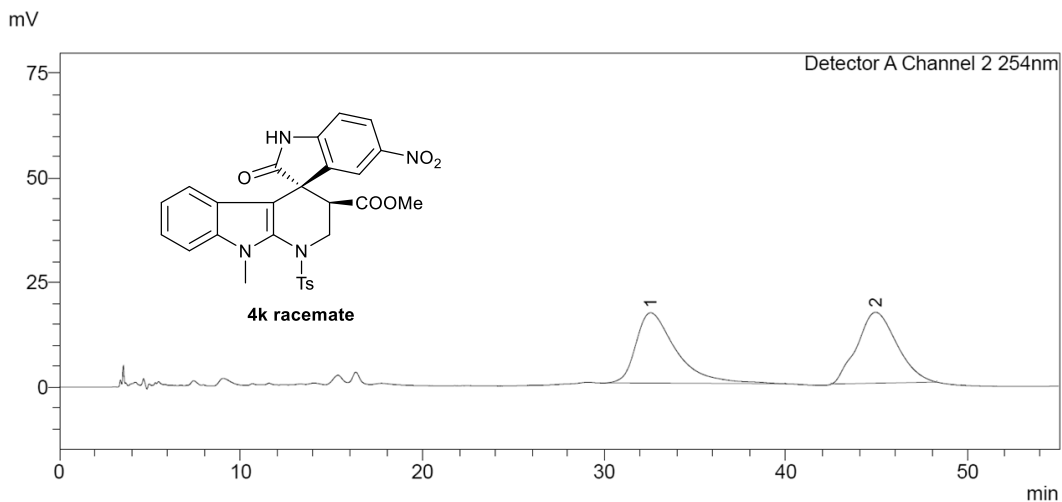

### Peak Analysis Report

Detector A Channel 2 254nm

| No.   | Ret. Time | Height (mAu) | Area (mAu*min) | Rel. Area (%) |
|-------|-----------|--------------|----------------|---------------|
| 1     | 32.550    | 16841        | 2588131        | 50.078        |
| 2     | 44.934    | 16946        | 2580079        | 49.922        |
| Total |           | 33787        | 5168211        | 100.000       |

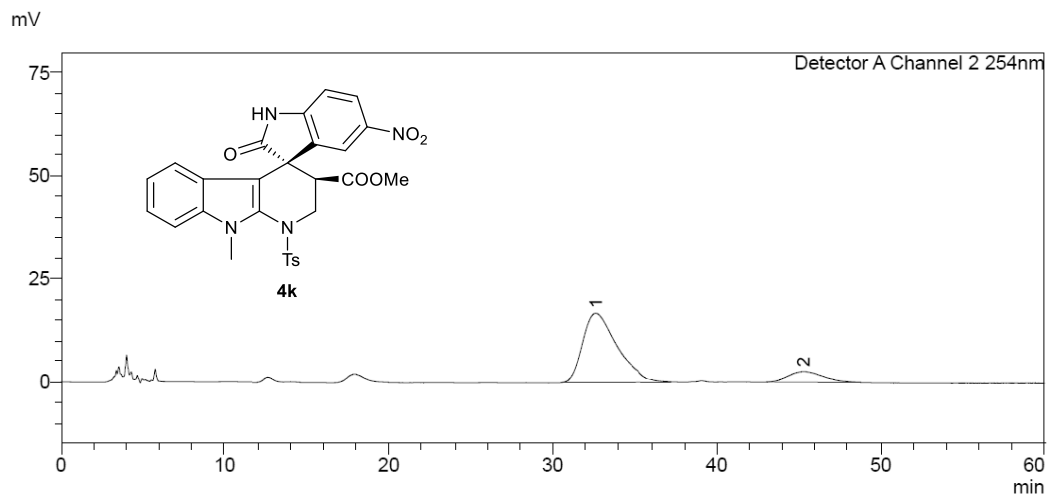

### Peak Analysis Report

Detector A Channel 2 254nm

| No.   | Ret. Time | Height (mAu) | Area (mAu*min) | Rel. Area (%) |
|-------|-----------|--------------|----------------|---------------|
| 1     | 32.622    | 16753        | 2743309        | 88.076        |
| 2     | 45.300    | 2527         | 371391         | 11.924        |
| Total |           | 19280        | 3114700        | 100.000       |

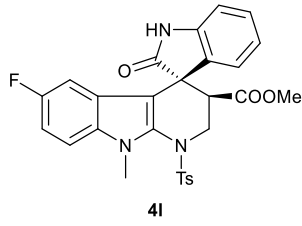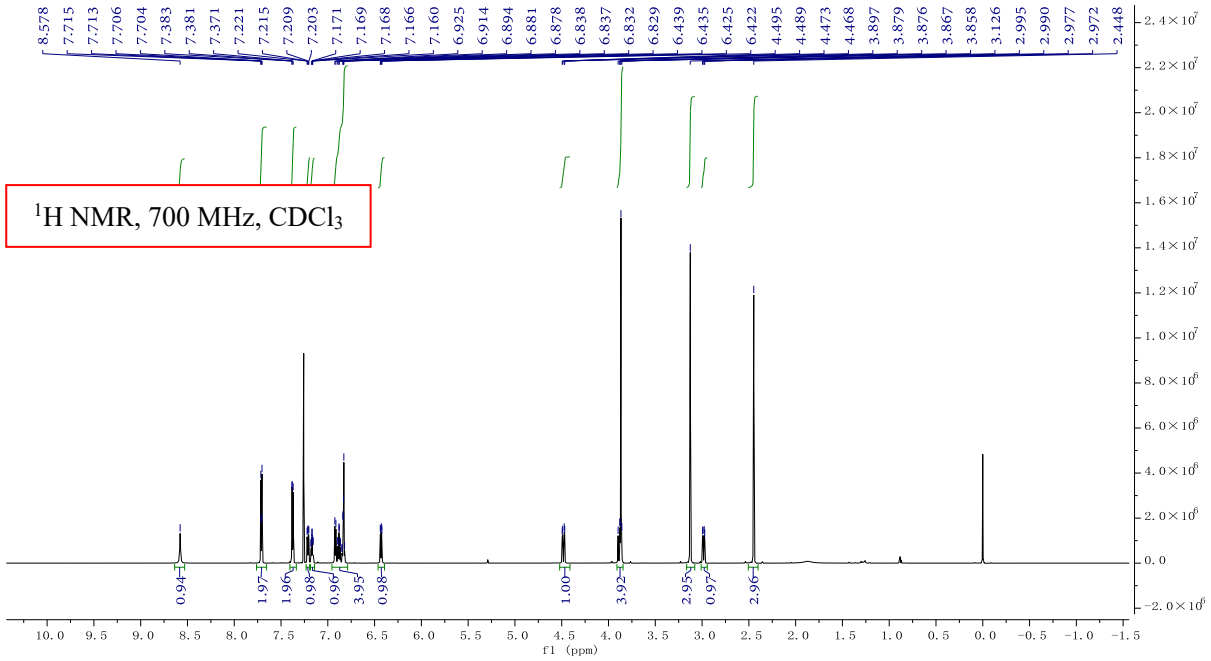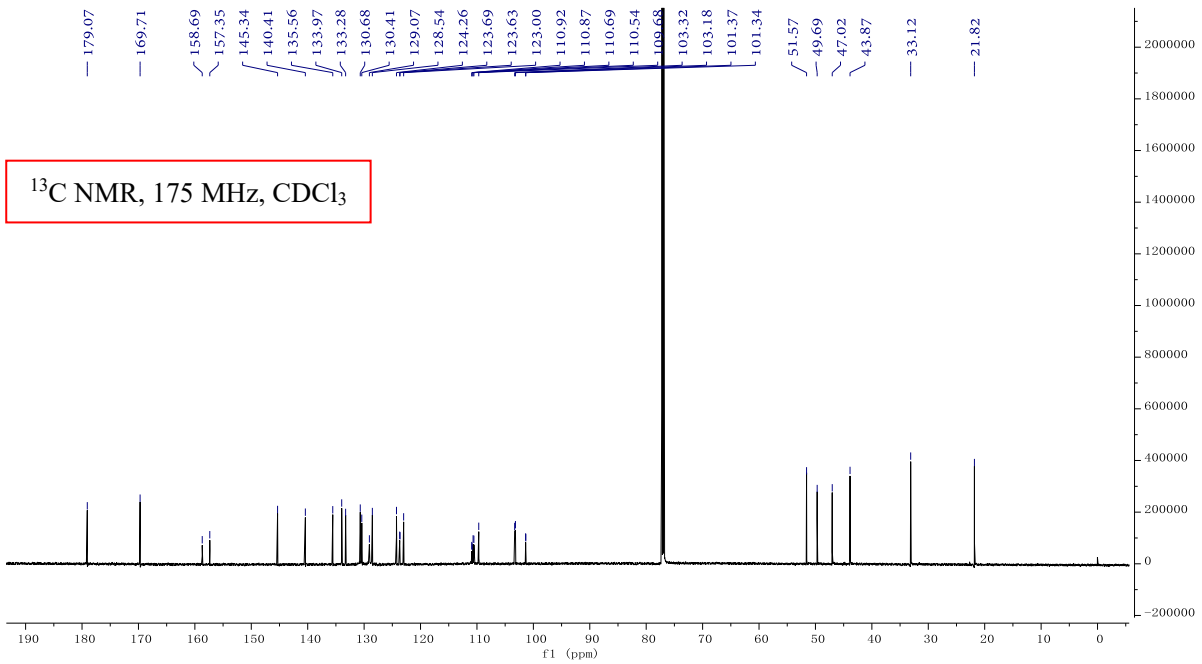

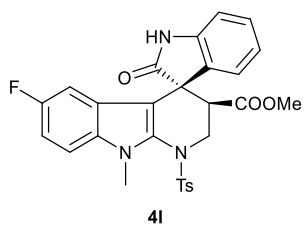

$^{19}\text{F}$  NMR, 658 MHz,  $\text{DMSO-}d_6$

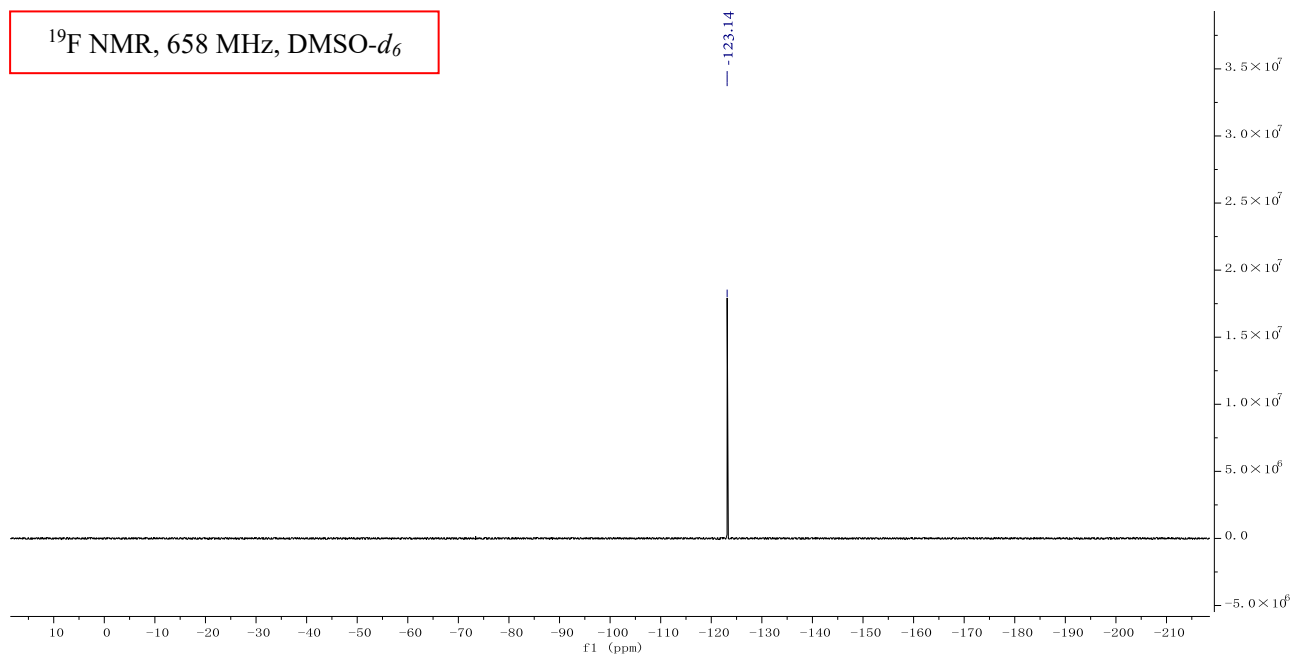



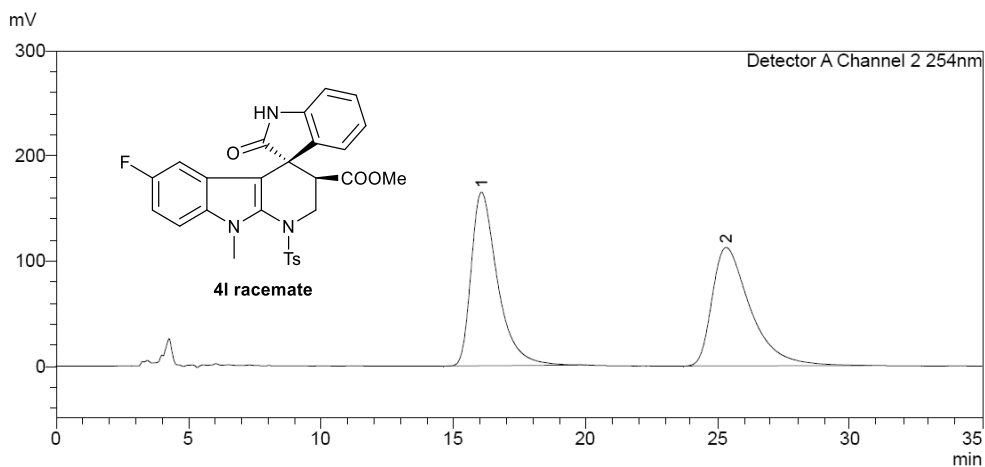

### Peak Analysis Report

| Detector A Channel 2 254nm |           |              |                |               |
|----------------------------|-----------|--------------|----------------|---------------|
| No.                        | Ret. Time | Height (mAu) | Area (mAu*min) | Rel. Area (%) |
| 1                          | 16.088    | 165206       | 11427945       | 50.260        |
| 2                          | 25.329    | 112752       | 11309589       | 49.740        |
| Total                      |           | 277958       | 22737534       | 100.000       |

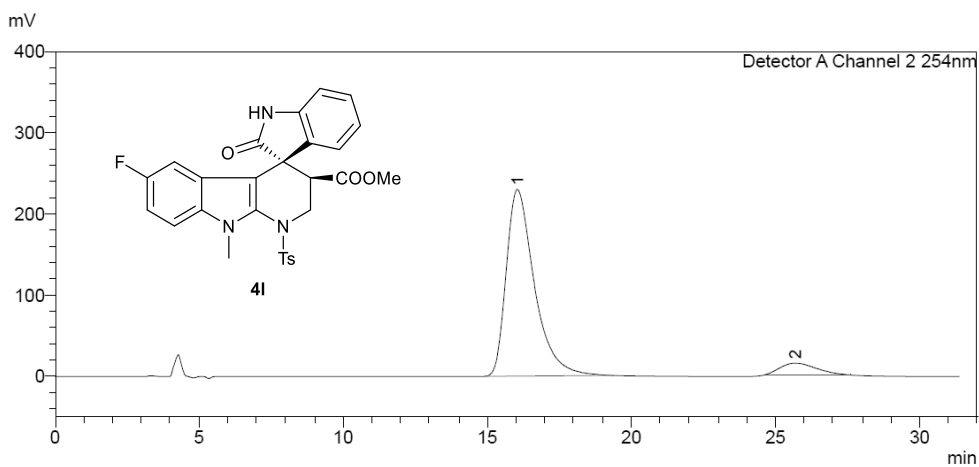

### Peak Analysis Report

| Detector A Channel 2 254nm |           |              |                |               |
|----------------------------|-----------|--------------|----------------|---------------|
| No.                        | Ret. Time | Height (mAu) | Area (mAu*min) | Rel. Area (%) |
| 1                          | 16.048    | 229414       | 15577984       | 92.438        |
| 2                          | 25.691    | 14552        | 1274444        | 7.562         |
| Total                      |           | 243966       | 16852428       | 100.000       |

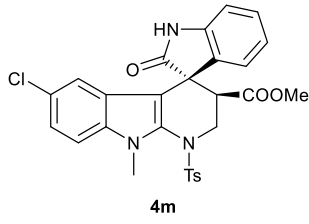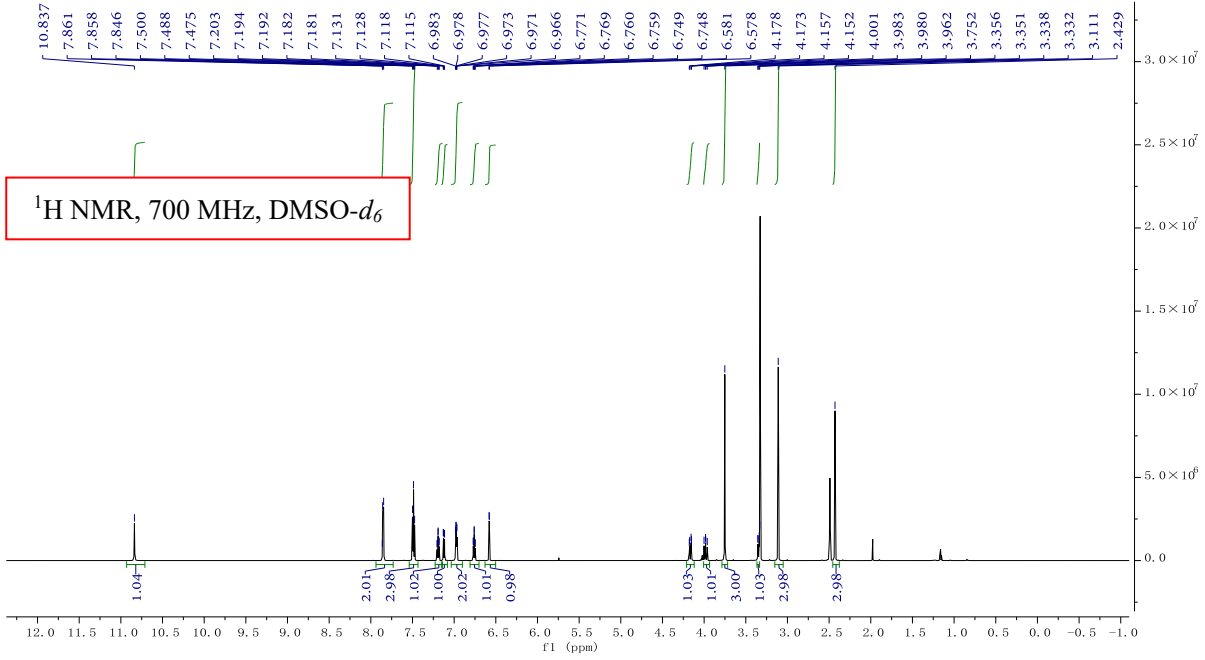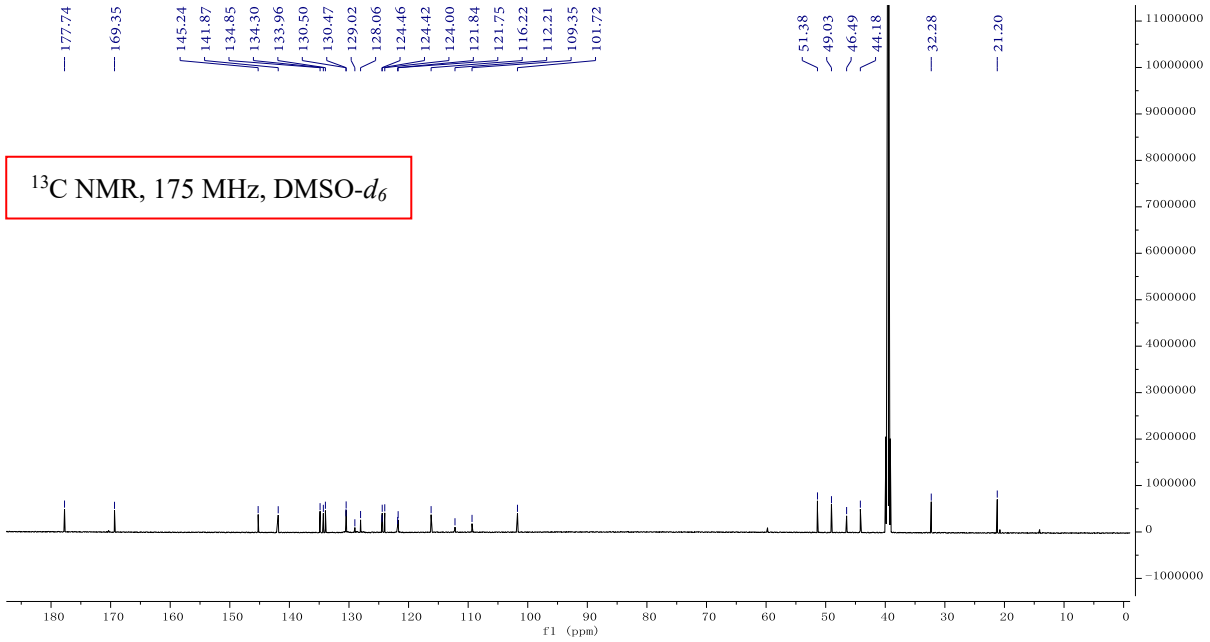

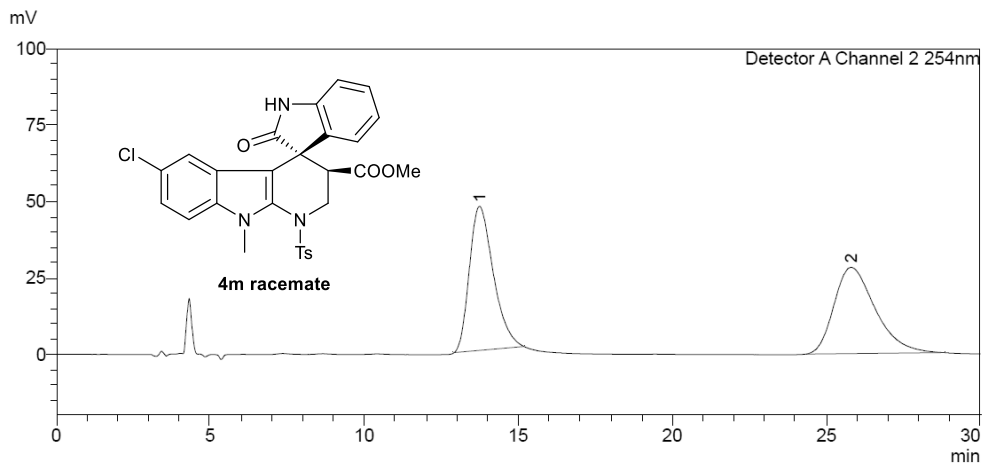

### Peak Analysis Report

Detector A Channel 2 254nm

| No.   | Ret. Time | Height (mAu) | Area (mAu*min) | Rel. Area (%) |
|-------|-----------|--------------|----------------|---------------|
| 1     | 13.743    | 47091        | 2548343        | 49.317        |
| 2     | 25.799    | 28178        | 2618927        | 50.683        |
| Total |           | 75268        | 5167270        | 100.000       |

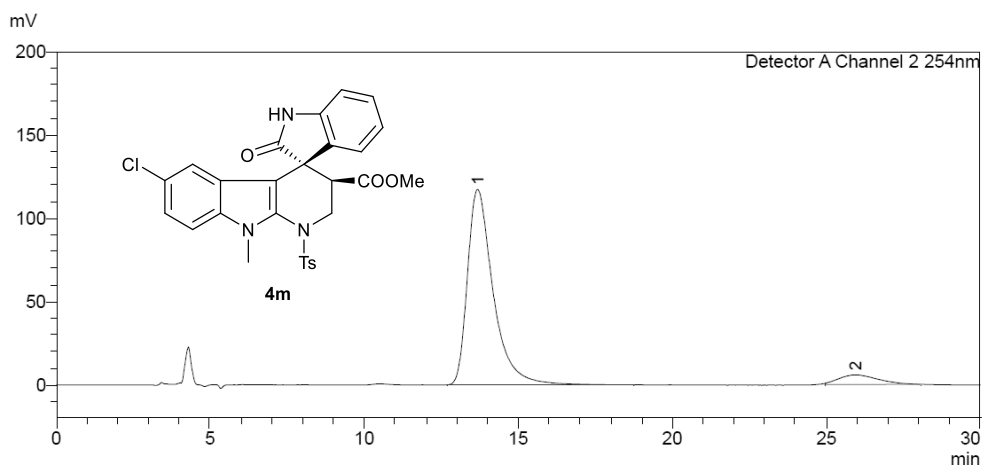

### Peak Analysis Report

Detector A Channel 2 254nm

| No.   | Ret. Time | Height (mAu) | Area (mAu*min) | Rel. Area (%) |
|-------|-----------|--------------|----------------|---------------|
| 1     | 13.680    | 117334       | 6818709        | 93.061        |
| 2     | 25.953    | 5682         | 508397         | 6.939         |
| Total |           | 123016       | 7327106        | 100.000       |

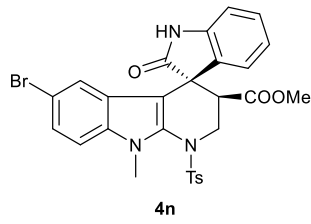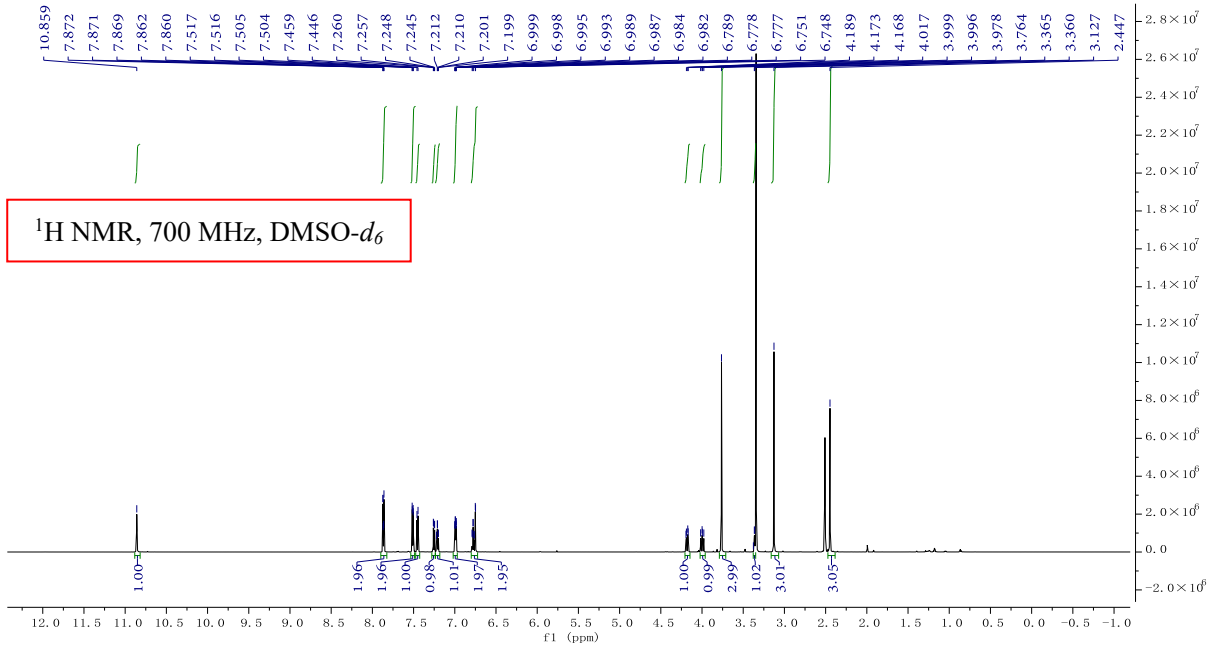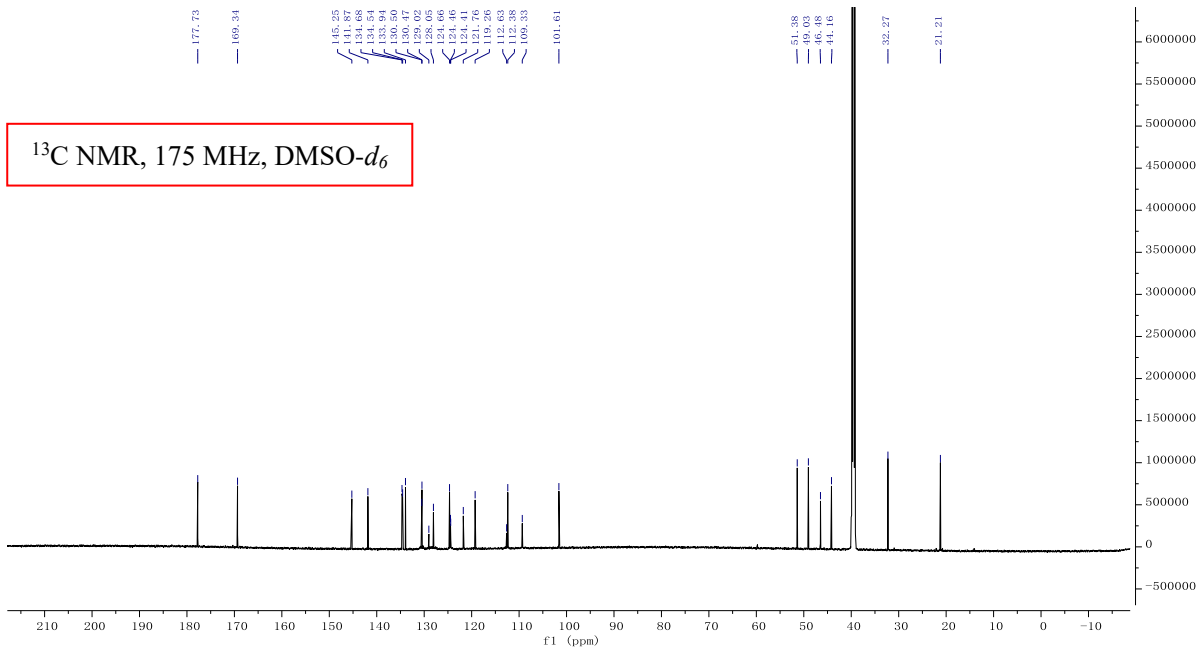

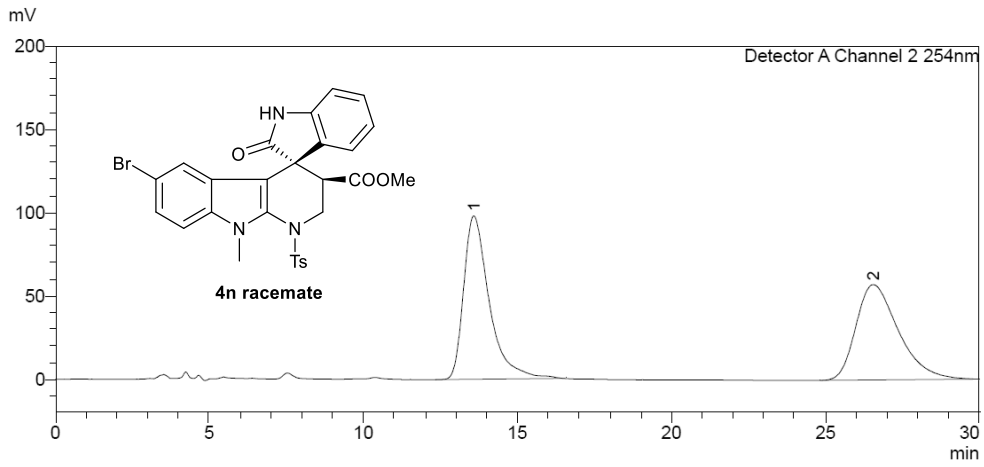

### Peak Analysis Report

| Detector A Channel 2 254nm |           |              |                |               |
|----------------------------|-----------|--------------|----------------|---------------|
| No.                        | Ret. Time | Height (mAu) | Area (mAu*min) | Rel. Area (%) |
| 1                          | 13.585    | 97936        | 5672297        | 50.833        |
| 2                          | 26.549    | 57186        | 5486373        | 49.167        |
| Total                      |           | 155122       | 11158670       | 100.000       |

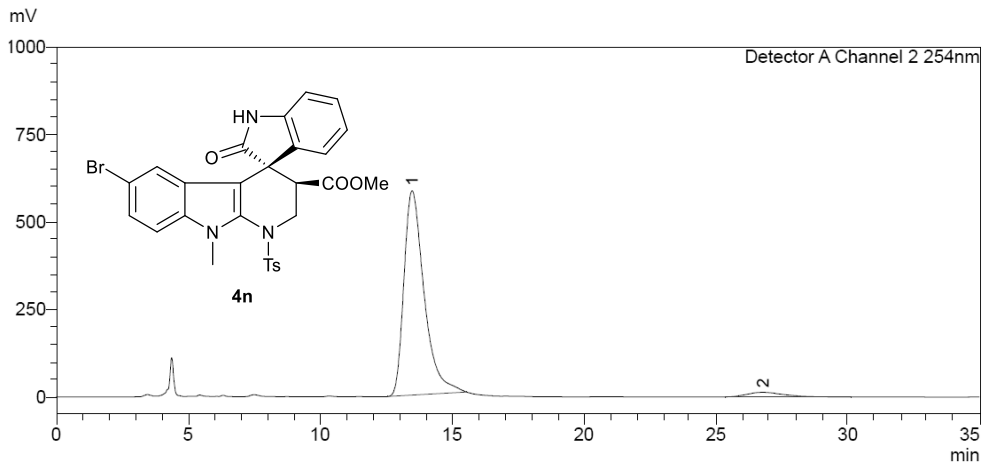

### Peak Analysis Report

| Detector A Channel 2 254nm |           |              |                |               |
|----------------------------|-----------|--------------|----------------|---------------|
| No.                        | Ret. Time | Height (mAu) | Area (mAu*min) | Rel. Area (%) |
| 1                          | 13.495    | 583920       | 31130269       | 96.079        |
| 2                          | 26.785    | 12985        | 1270393        | 3.921         |
| Total                      |           | 596905       | 32400662       | 100.000       |

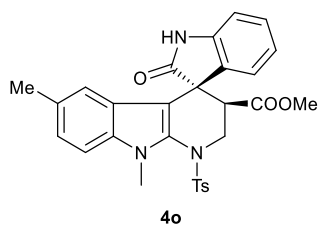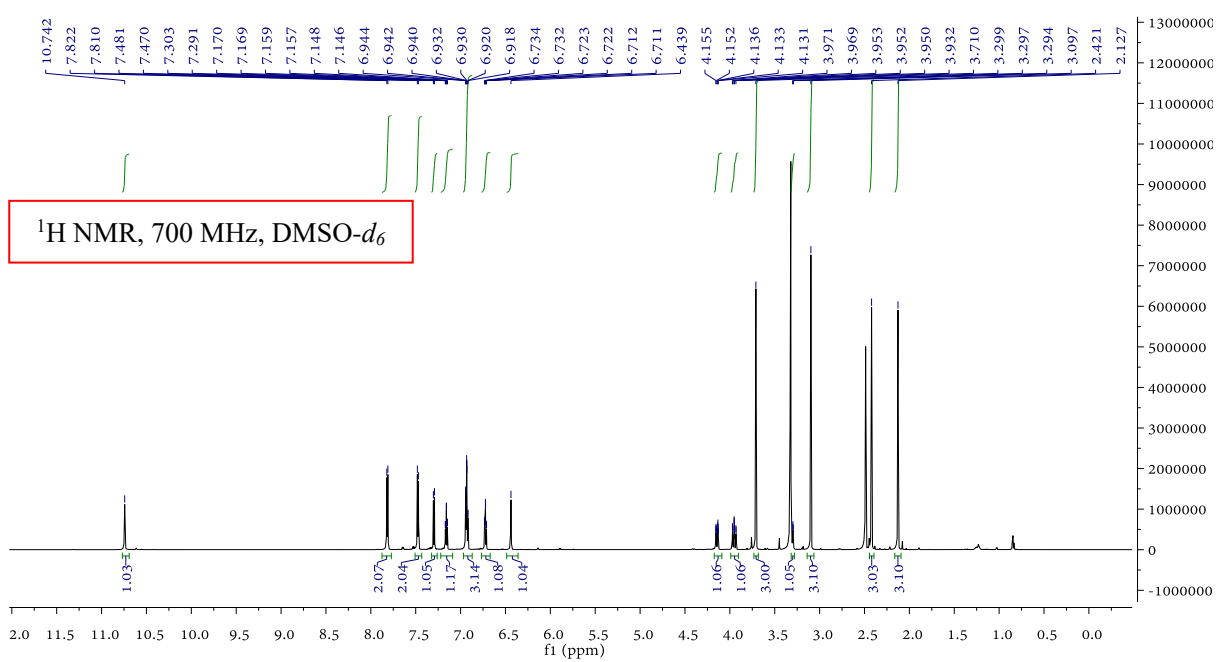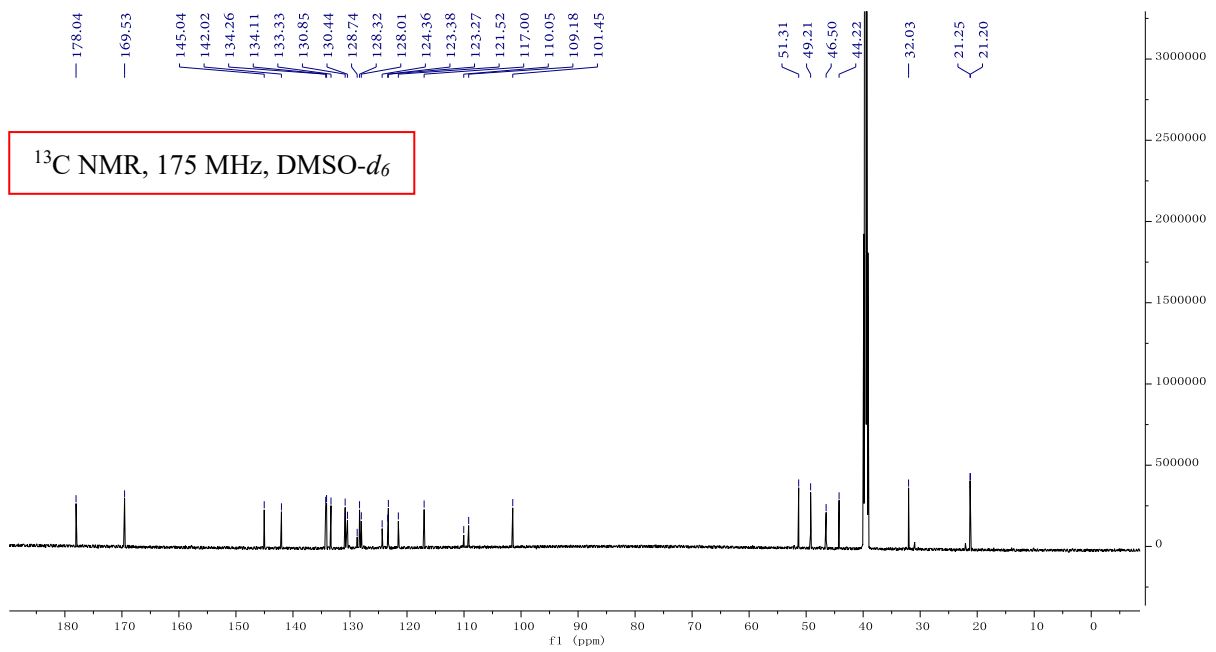

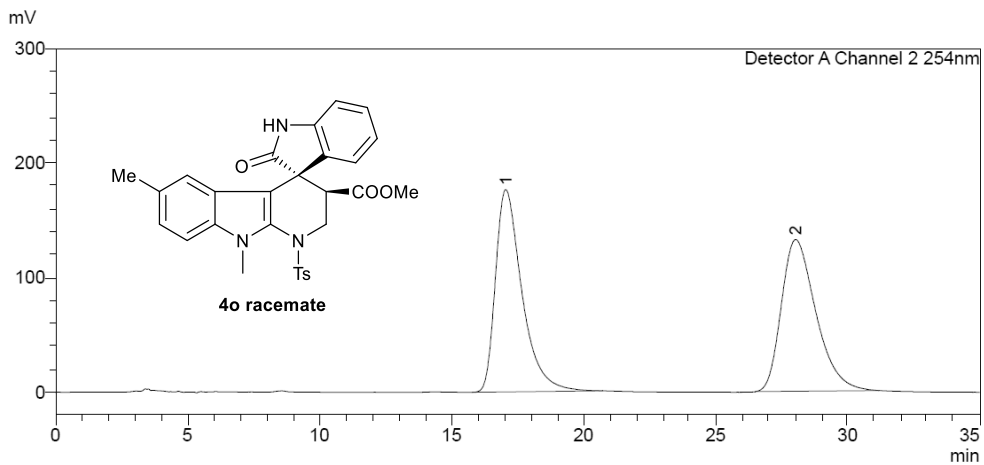

### Peak Analysis Report

| Detector A Channel 2 254nm |           |              |                |               |
|----------------------------|-----------|--------------|----------------|---------------|
| No.                        | Ret. Time | Height (mAu) | Area (mAu*min) | Rel. Area (%) |
| 1                          | 17.061    | 176492       | 12306311       | 50.567        |
| 2                          | 28.037    | 132365       | 12030156       | 49.433        |
| Total                      |           | 308857       | 24336467       | 100.000       |

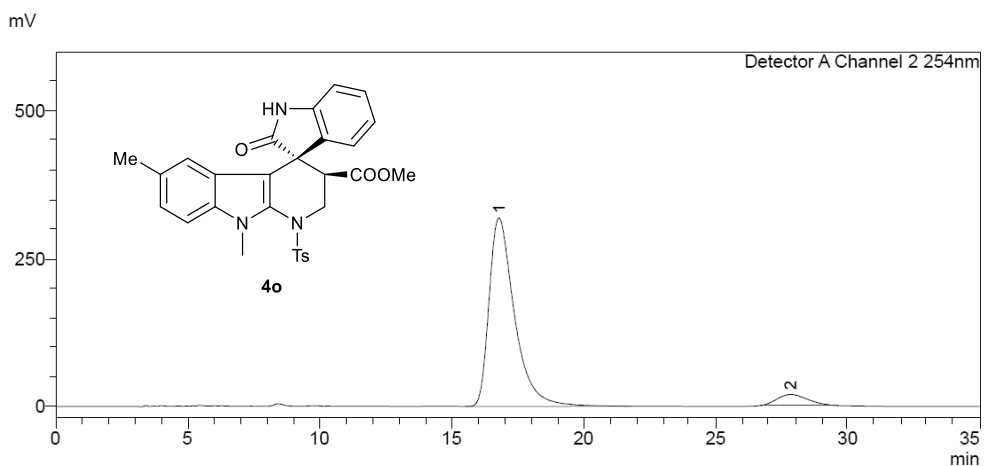

### Peak Analysis Report

| Detector A Channel 2 254nm |           |              |                |               |
|----------------------------|-----------|--------------|----------------|---------------|
| No.                        | Ret. Time | Height (mAu) | Area (mAu*min) | Rel. Area (%) |
| 1                          | 16.801    | 318488       | 21314102       | 93.448        |
| 2                          | 27.841    | 18483        | 1494316        | 6.552         |
| Total                      |           | 336971       | 22808418       | 100.000       |

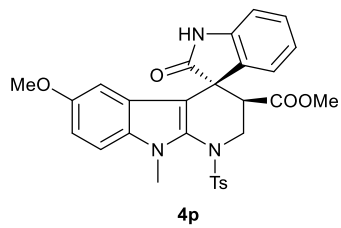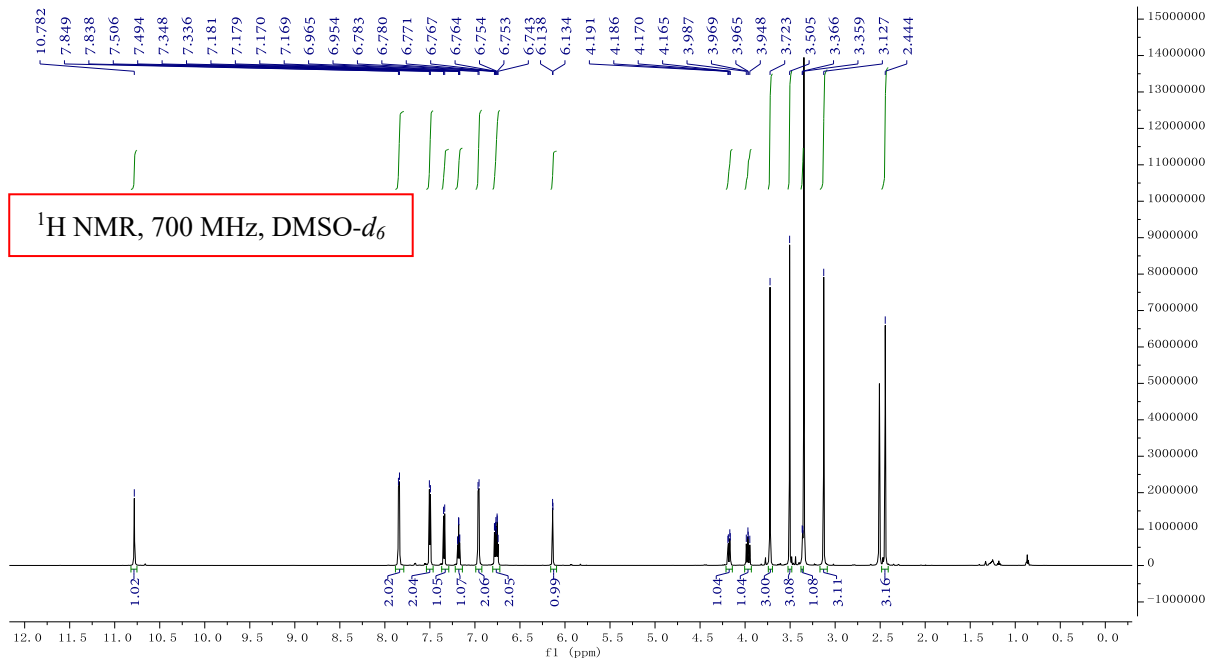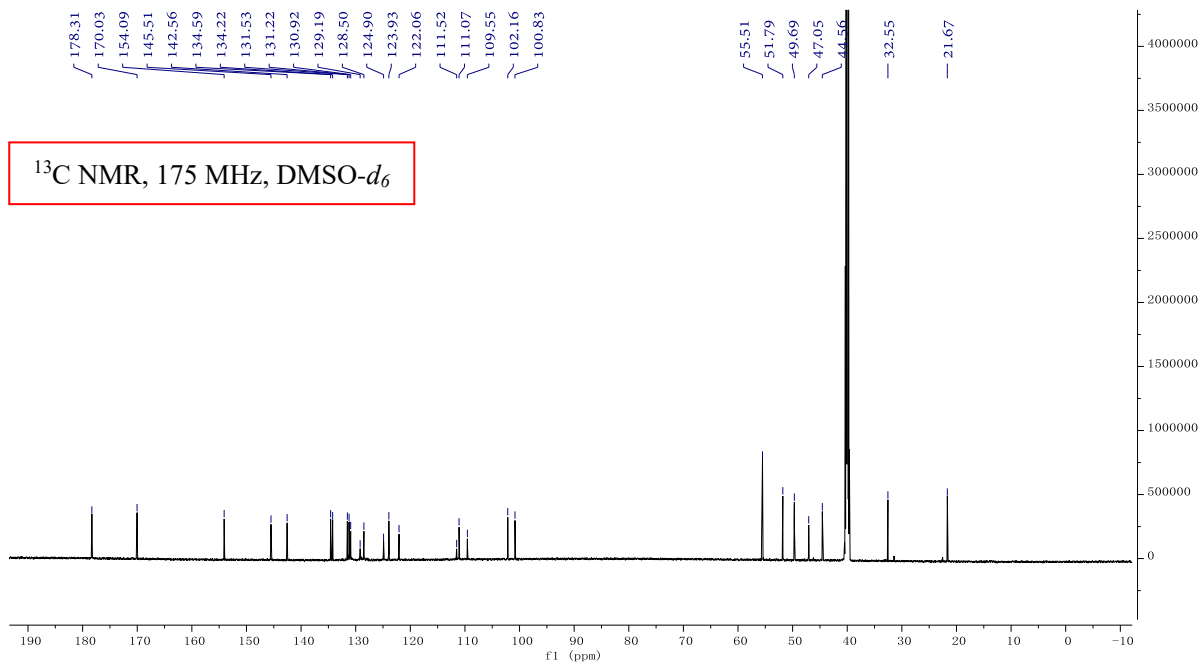



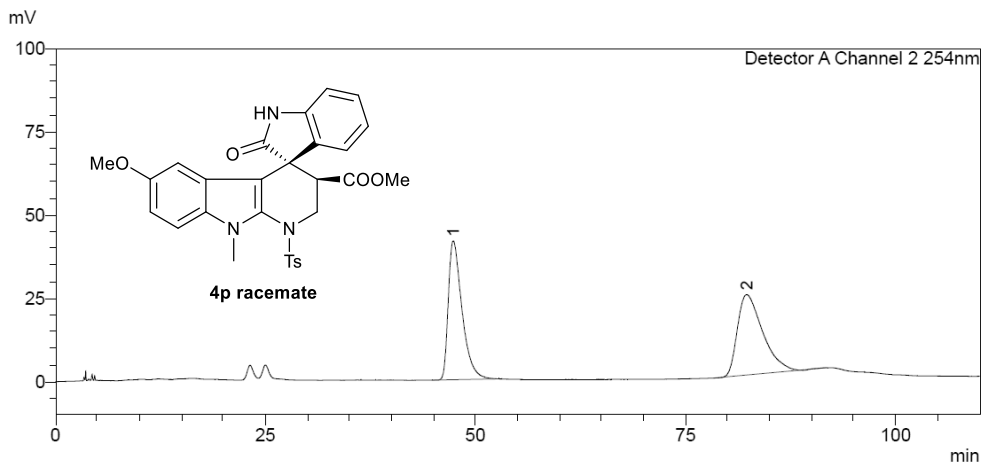

**Peak Analysis Report**

Detector A Channel 2 254nm

| No.   | Ret. Time | Height (mAu) | Area (mAu*min) | Rel. Area (%) |
|-------|-----------|--------------|----------------|---------------|
| 1     | 47.371    | 41678        | 4738376        | 48.493        |
| 2     | 82.286    | 24143        | 5032874        | 51.507        |
| Total |           | 65821        | 9771250        | 100.000       |

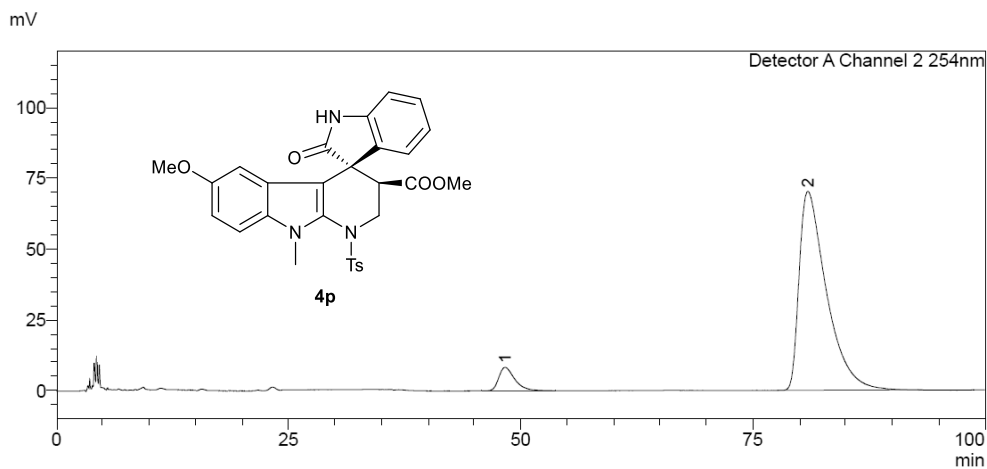

**Peak Analysis Report**

Detector A Channel 2 254nm

| No.   | Ret. Time | Height (mAu) | Area (mAu*min) | Rel. Area (%) |
|-------|-----------|--------------|----------------|---------------|
| 1     | 48.319    | 8297         | 996136         | 6.489         |
| 2     | 80.952    | 70119        | 14355178       | 93.511        |
| Total |           | 78416        | 15351313       | 100.000       |

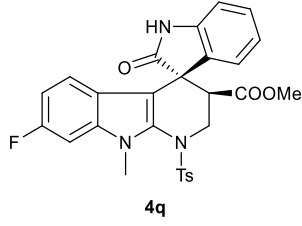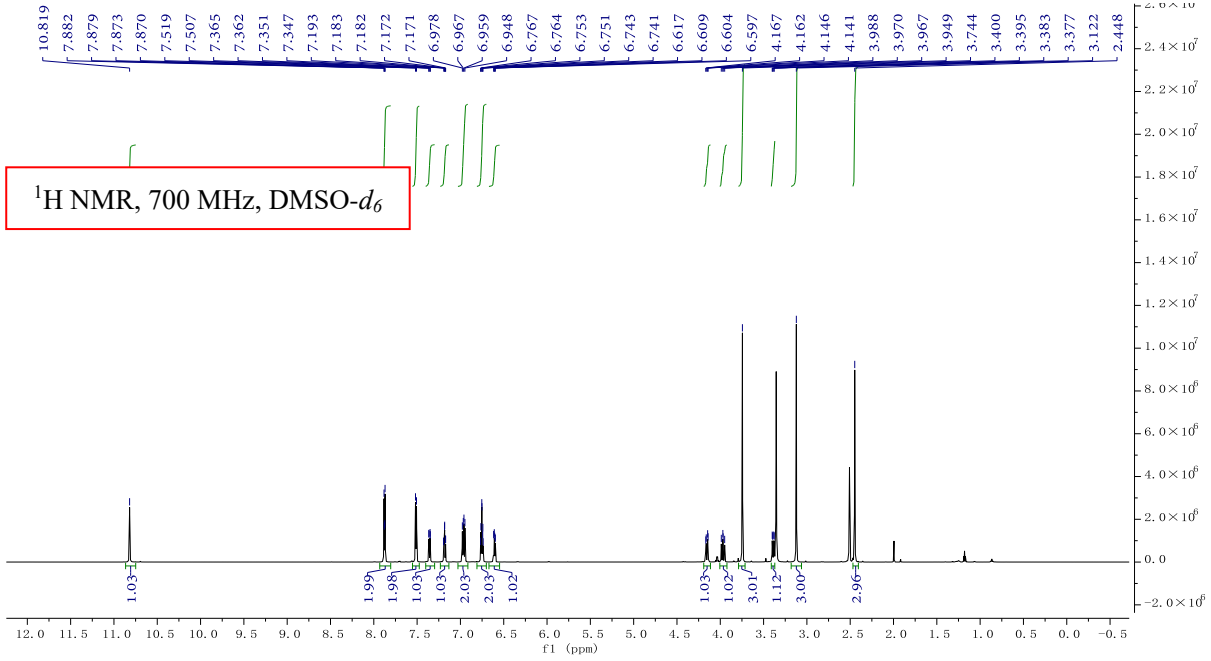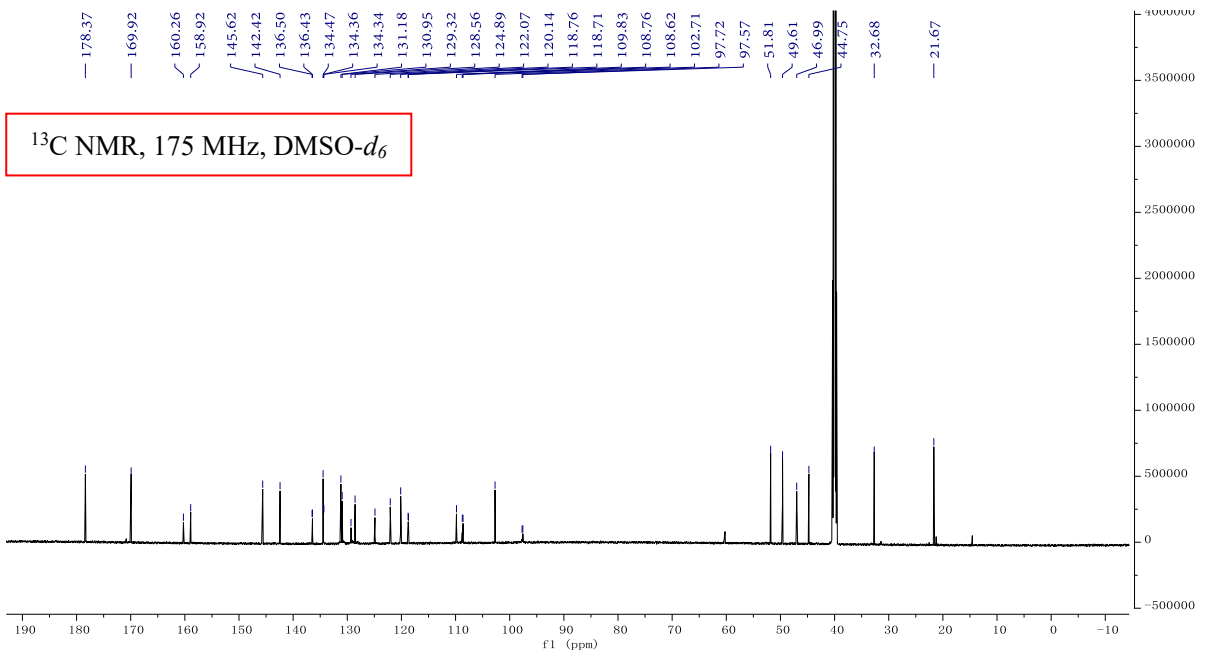

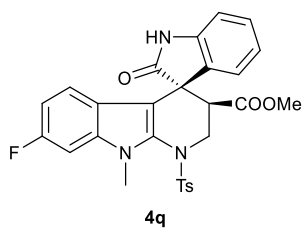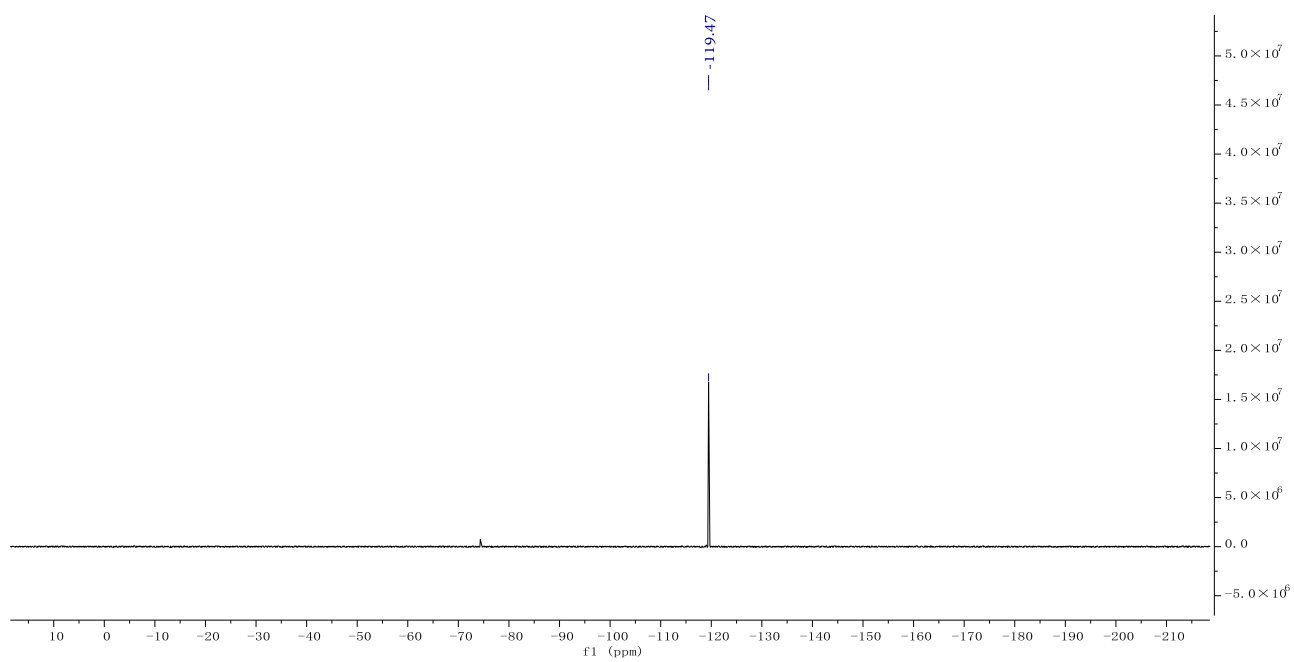

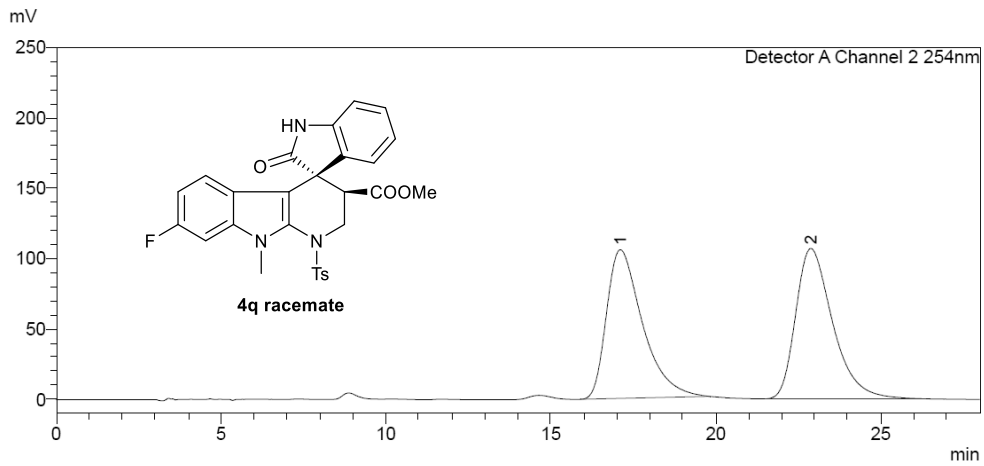

### Peak Analysis Report

| Detector A Channel 2 254nm |           |              |                |               |
|----------------------------|-----------|--------------|----------------|---------------|
| No.                        | Ret. Time | Height (mAu) | Area (mAu*min) | Rel. Area (%) |
| 1                          | 17.108    | 105470       | 8010230        | 49.111        |
| 2                          | 22.883    | 106551       | 8300070        | 50.889        |
| Total                      |           | 212021       | 16310300       | 100.000       |

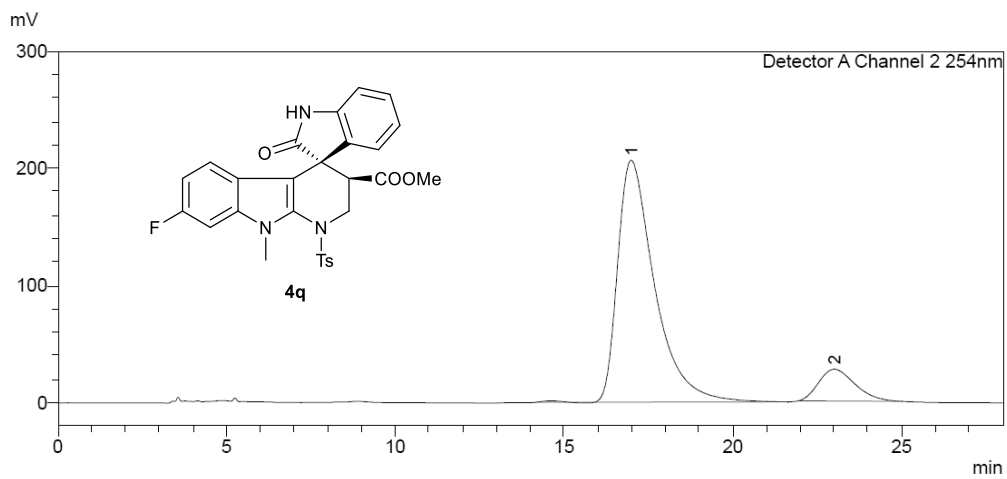

### Peak Analysis Report

| Detector A Channel 2 254nm |           |              |                |               |
|----------------------------|-----------|--------------|----------------|---------------|
| No.                        | Ret. Time | Height (mAu) | Area (mAu*min) | Rel. Area (%) |
| 1                          | 16.992    | 206438       | 15718275       | 88.568        |
| 2                          | 23.014    | 27149        | 2028926        | 11.432        |
| Total                      |           | 233587       | 17747202       | 100.000       |

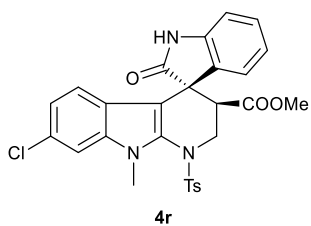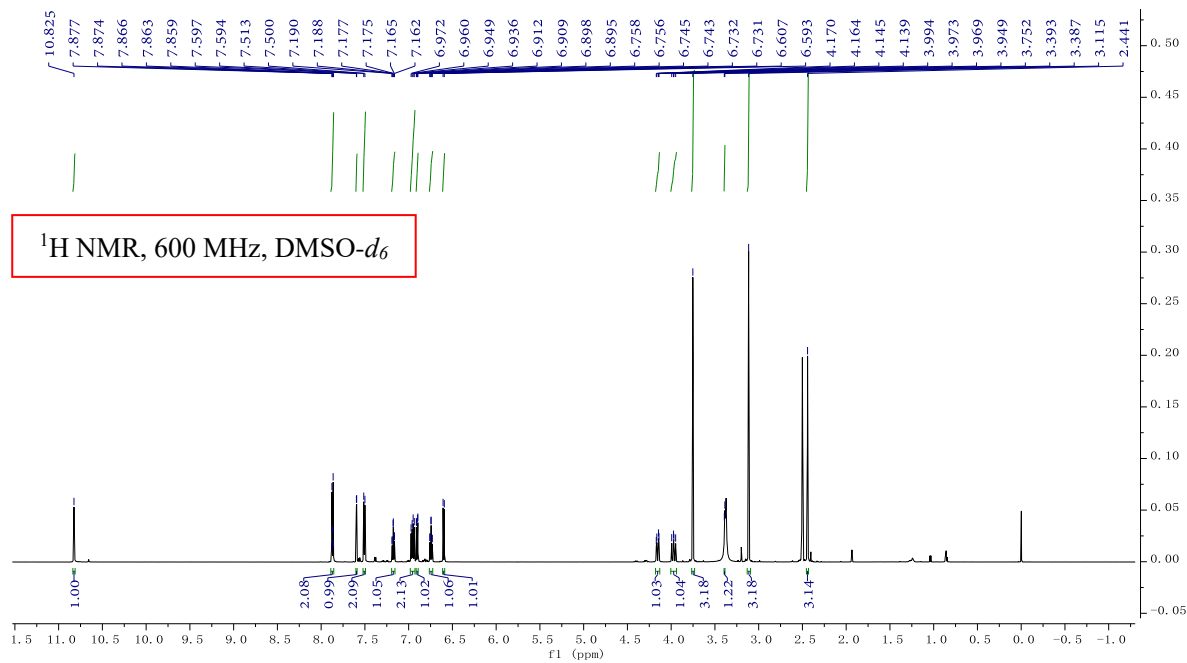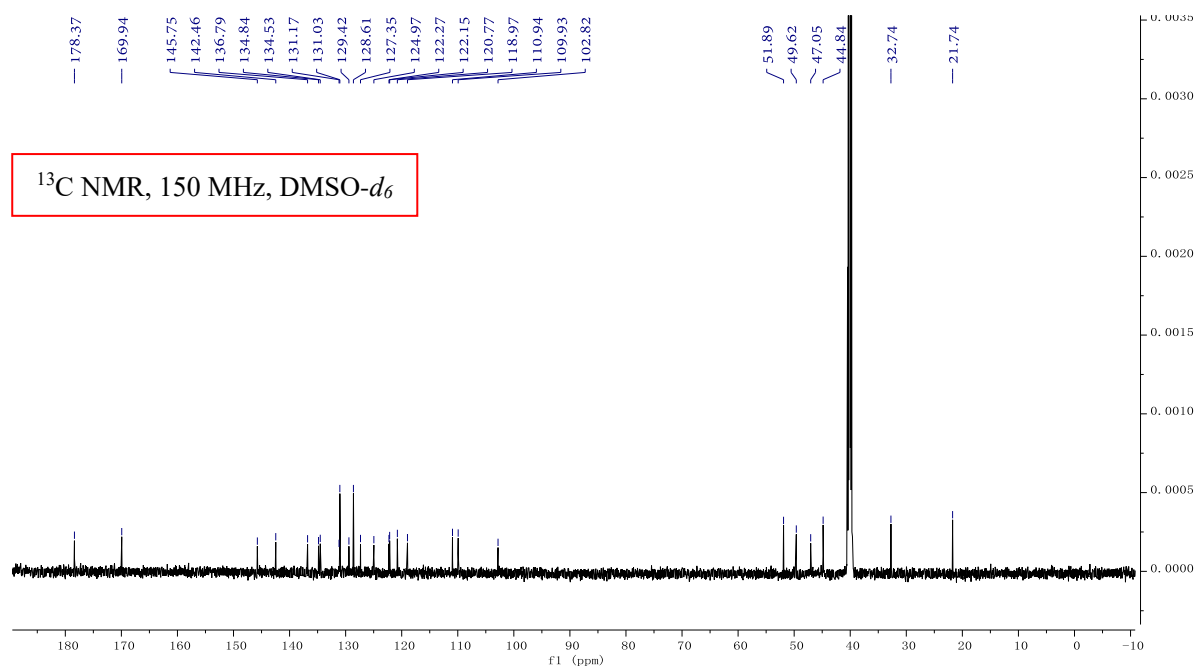

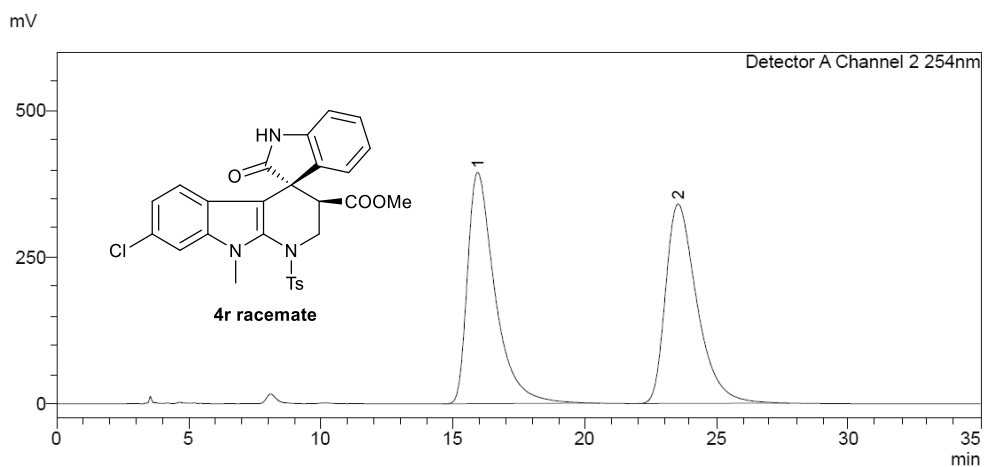

### Peak Analysis Report

Detector A Channel 2 254nm

| No.   | Ret. Time | Height (mAu) | Area (mAu*min) | Rel. Area (%) |
|-------|-----------|--------------|----------------|---------------|
| 1     | 15.964    | 394108       | 28482322       | 50.379        |
| 2     | 23.551    | 339609       | 28054314       | 49.621        |
| Total |           | 733717       | 56536635       | 100.000       |

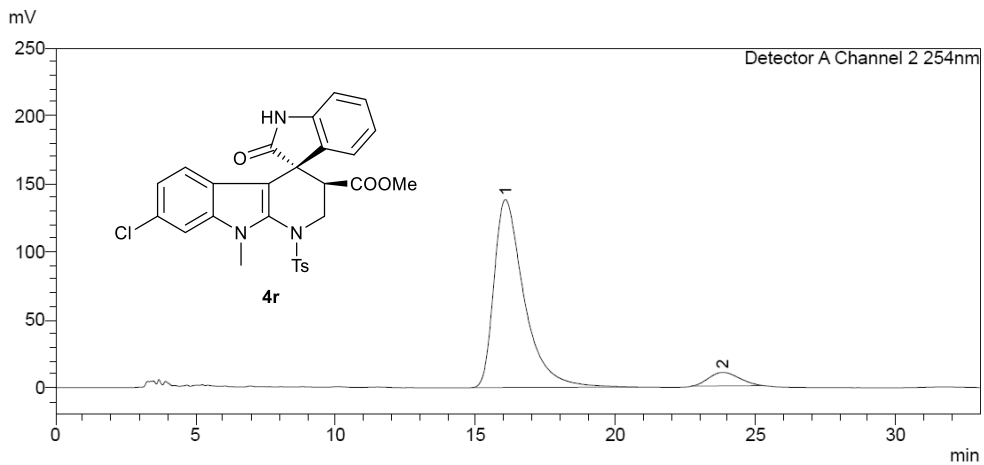

### Peak Analysis Report

Detector A Channel 2 254nm

| No.   | Ret. Time | Height (mAu) | Area (mAu*min) | Rel. Area (%) |
|-------|-----------|--------------|----------------|---------------|
| 1     | 16.074    | 138368       | 10346464       | 93.167        |
| 2     | 23.829    | 10021        | 758774         | 6.833         |
| Total |           | 148389       | 11105237       | 100.000       |

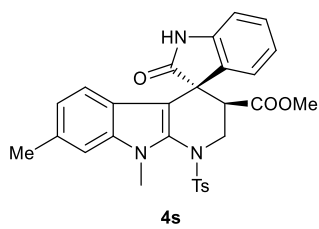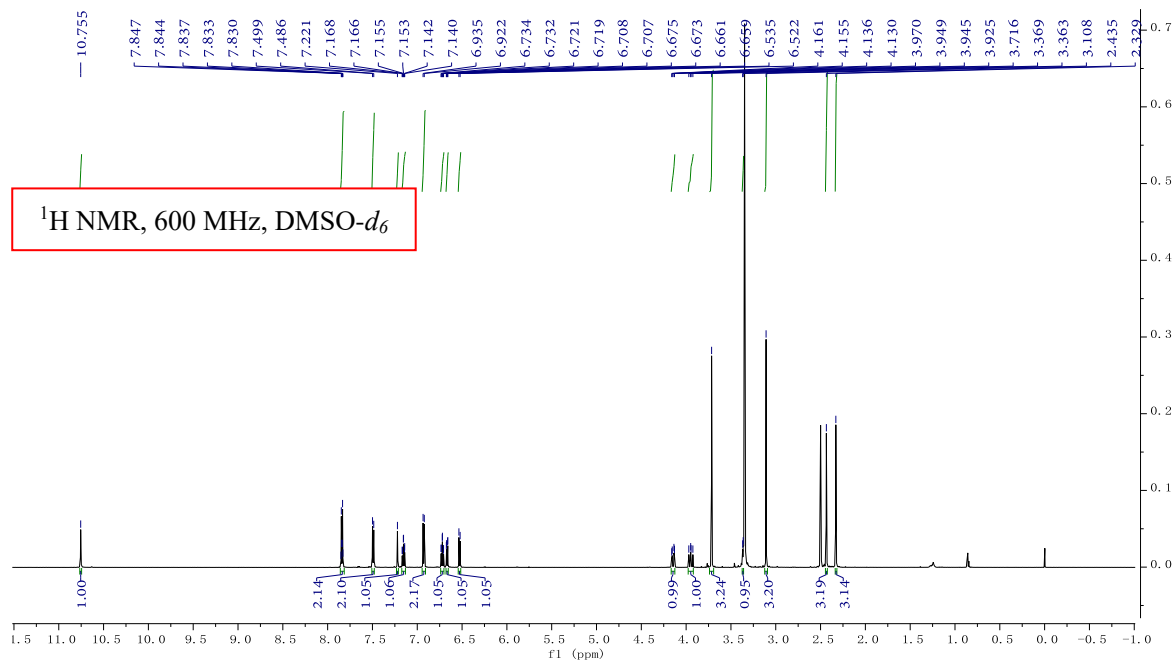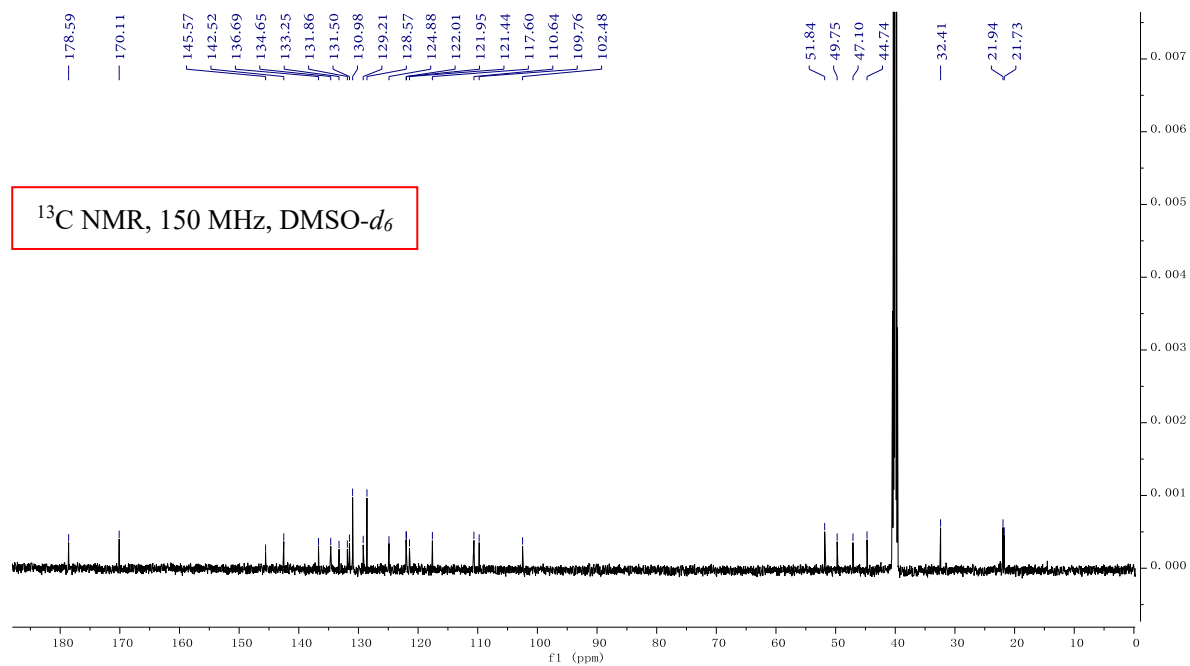

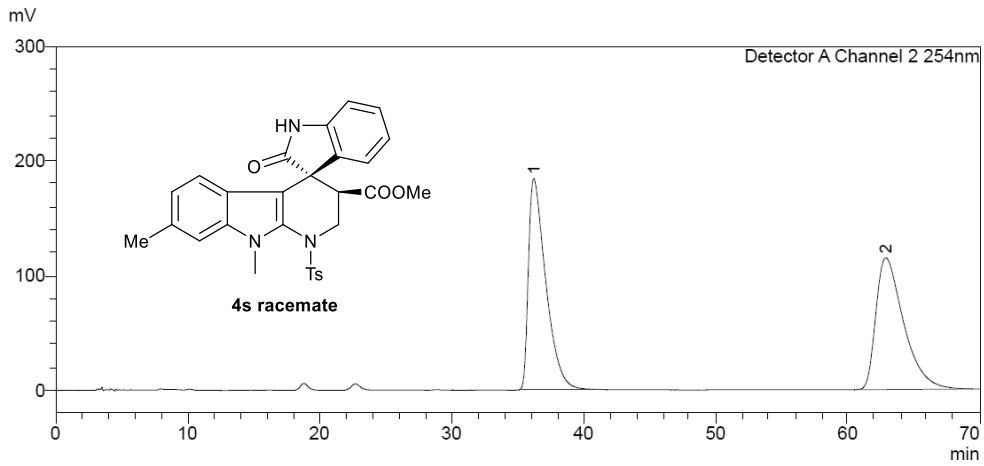

### Peak Analysis Report

Detector A Channel 2 254nm

| No.   | Ret. Time | Height (mAu) | Area (mAu*min) | Rel. Area (%) |
|-------|-----------|--------------|----------------|---------------|
| 1     | 36.244    | 183979       | 16841872       | 50.068        |
| 2     | 62.901    | 114766       | 16796139       | 49.932        |
| Total |           | 298745       | 33638011       | 100.000       |

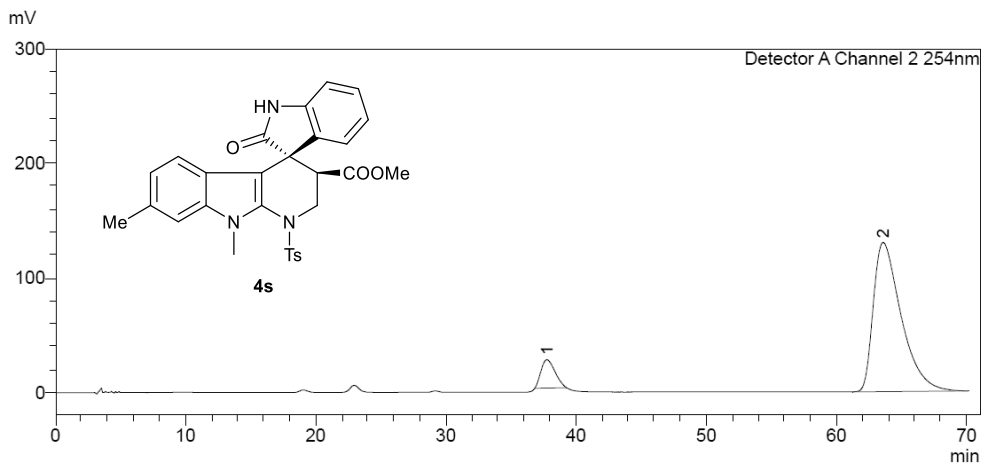

### Peak Analysis Report

Detector A Channel 2 254nm

| No.   | Ret. Time | Height (mAu) | Area (mAu*min) | Rel. Area (%) |
|-------|-----------|--------------|----------------|---------------|
| 1     | 37.767    | 24733        | 1857936        | 8.750         |
| 2     | 63.595    | 130143       | 19375919       | 91.250        |
| Total |           | 154877       | 21233855       | 100.000       |



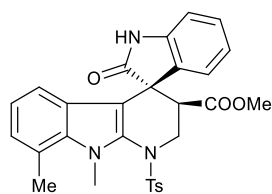

4t

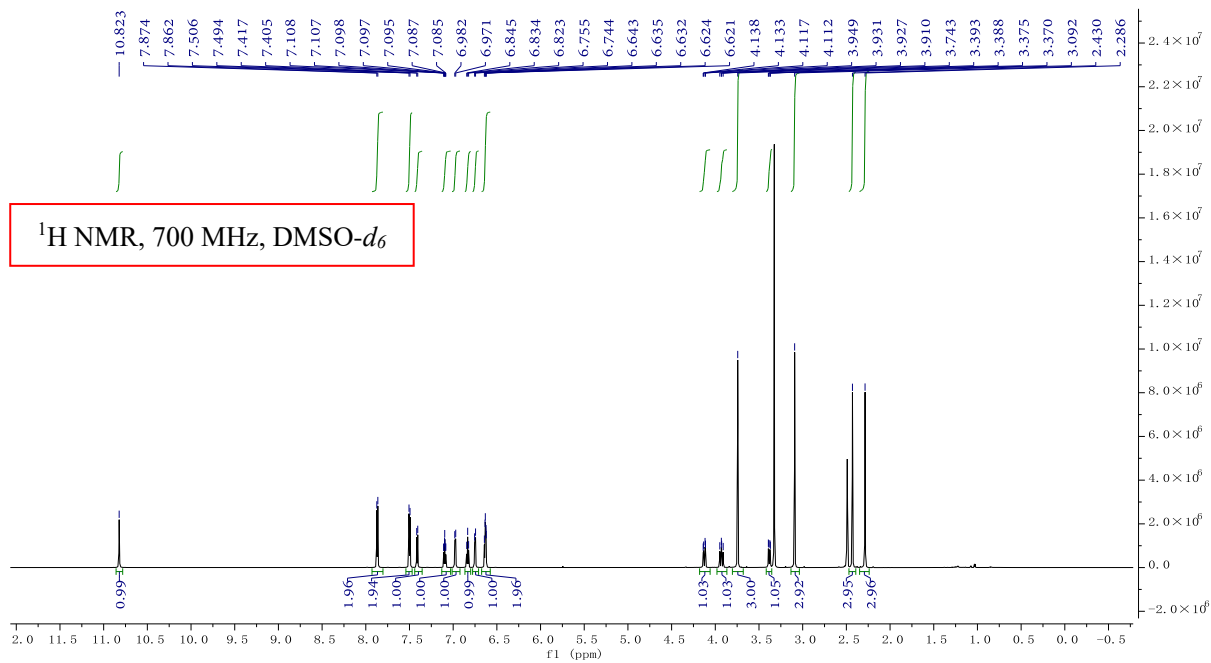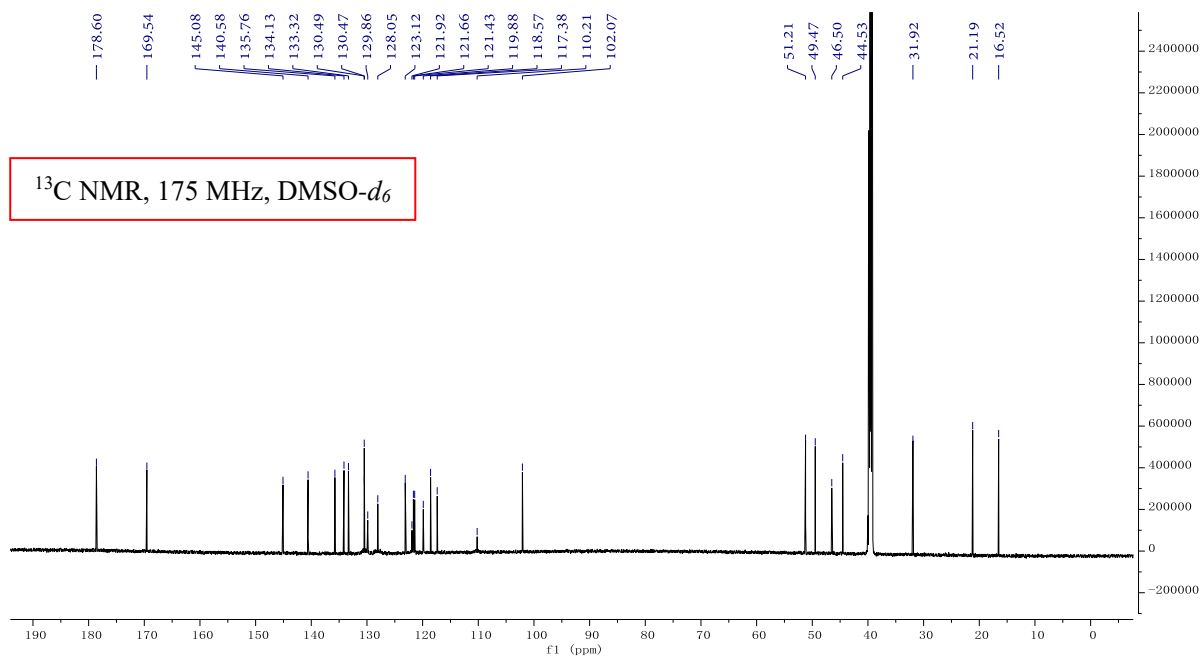

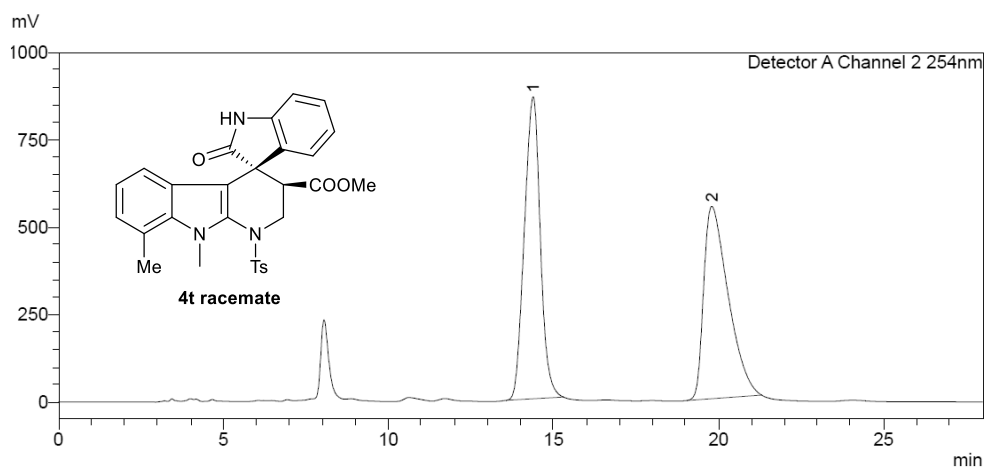

### Peak Analysis Report

Detector A Channel 2 254nm

| No.   | Ret. Time | Height (mAu) | Area (mAu*min) | Rel. Area (%) |
|-------|-----------|--------------|----------------|---------------|
| 1     | 14.387    | 863517       | 29033832       | 50.625        |
| 2     | 19.800    | 549804       | 28316740       | 49.375        |
| Total |           | 1413322      | 57350572       | 100.000       |

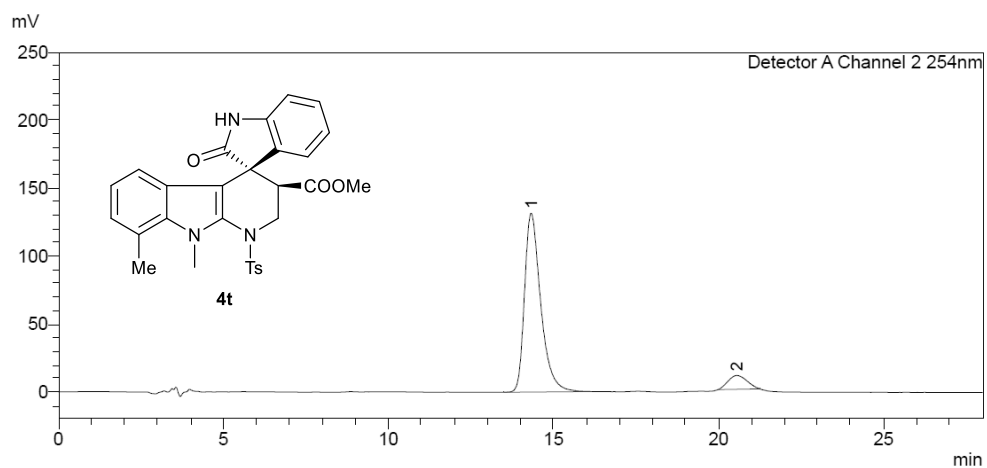

### Peak Analysis Report

Detector A Channel 2 254nm

| No.   | Ret. Time | Height (mAu) | Area (mAu*min) | Rel. Area (%) |
|-------|-----------|--------------|----------------|---------------|
| 1     | 14.326    | 131619       | 4485010        | 91.626        |
| 2     | 20.559    | 10168        | 409893         | 8.374         |
| Total |           | 141787       | 4894903        | 100.000       |

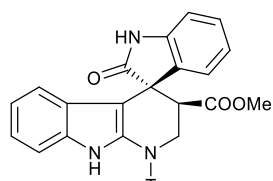

**4u**

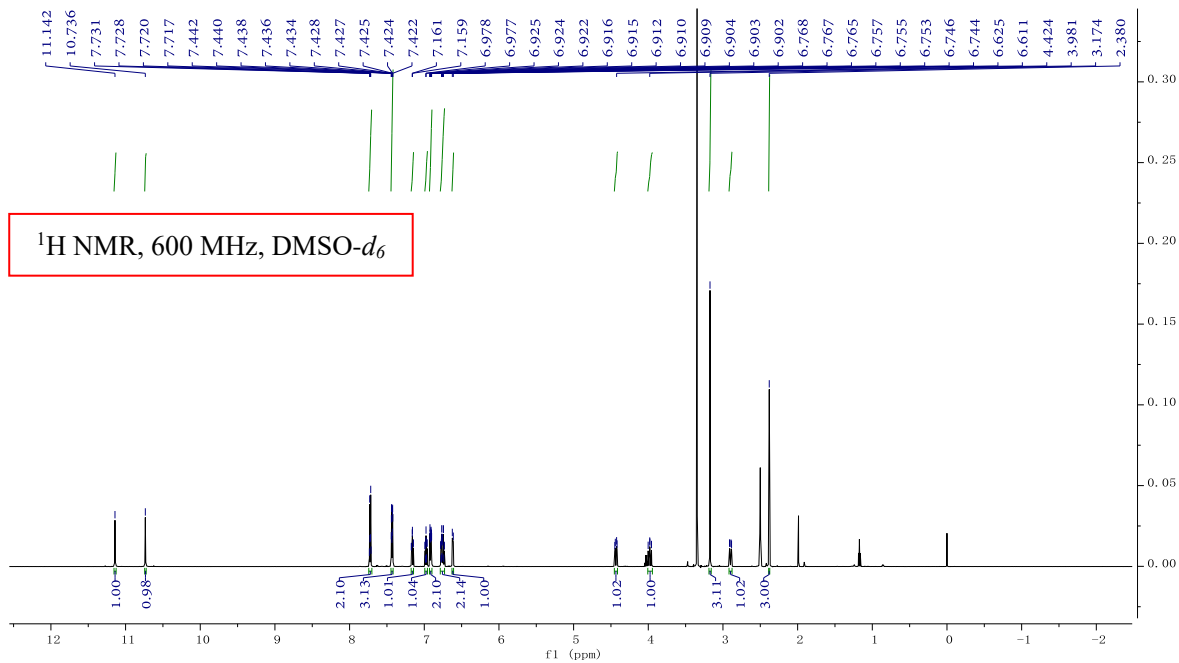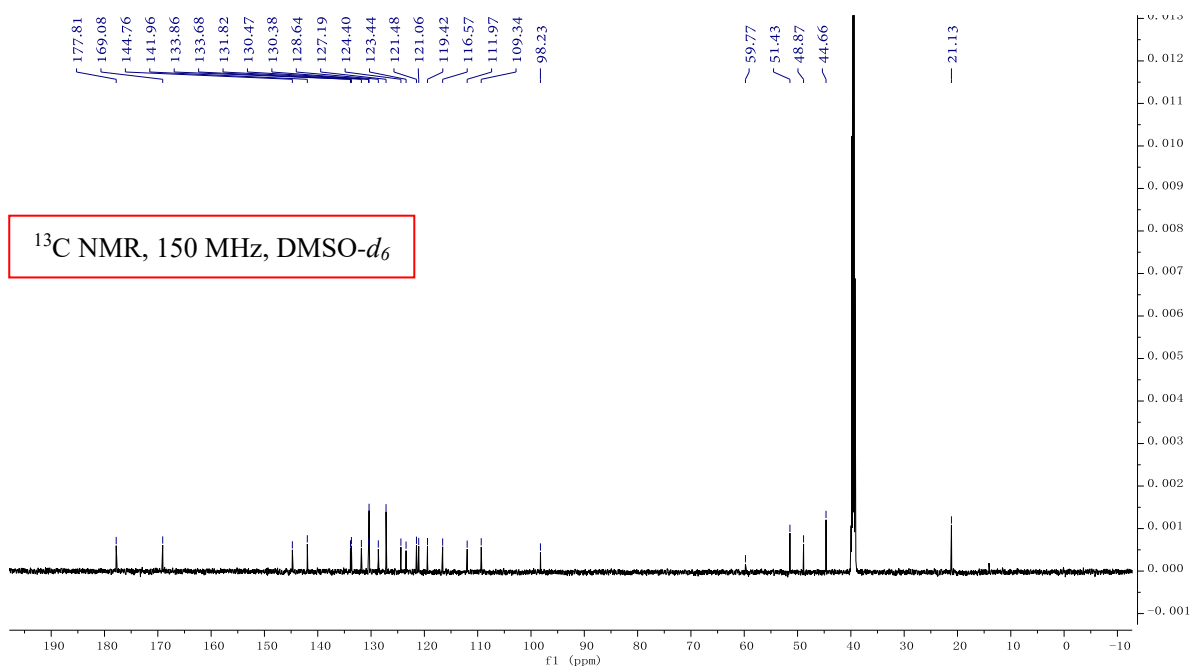

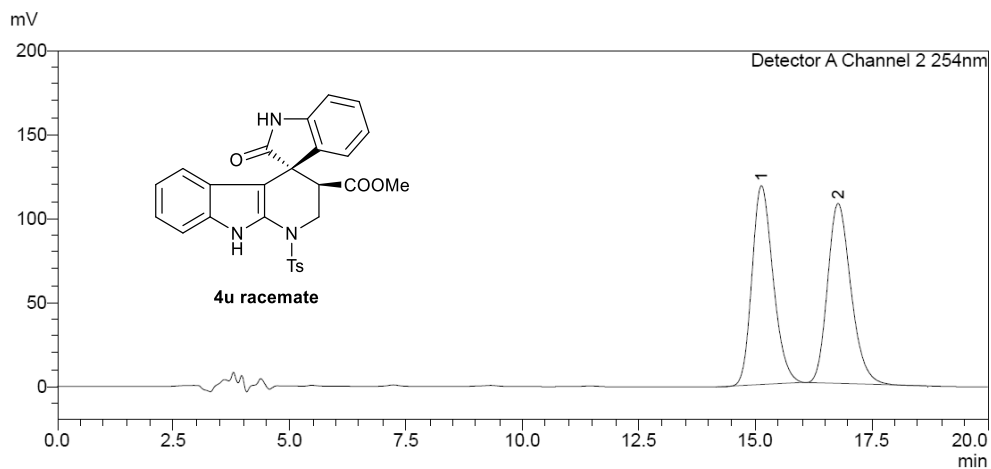

### Peak Analysis Report

| Detector A Channel 2 254nm |           |              |                |               |
|----------------------------|-----------|--------------|----------------|---------------|
| No.                        | Ret. Time | Height (mAu) | Area (mAu*min) | Rel. Area (%) |
| 1                          | 15.139    | 118363       | 3738633        | 49.955        |
| 2                          | 16.787    | 107046       | 3745397        | 50.045        |
| Total                      |           | 225409       | 7484030        | 100.000       |

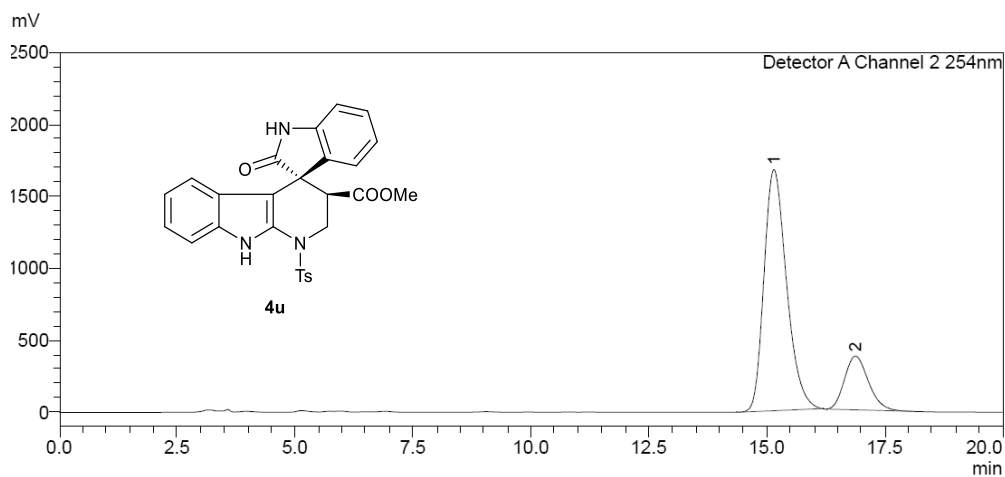

### Peak Analysis Report

| Detector A Channel 2 254nm |           |              |                |               |
|----------------------------|-----------|--------------|----------------|---------------|
| No.                        | Ret. Time | Height (mAu) | Area (mAu*min) | Rel. Area (%) |
| 1                          | 15.155    | 1671988      | 55738794       | 80.935        |
| 2                          | 16.884    | 372581       | 13129928       | 19.065        |
| Total                      |           | 2044569      | 68868721       | 100.000       |

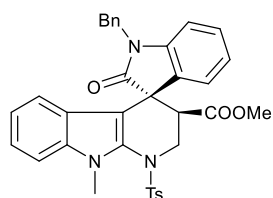

4v

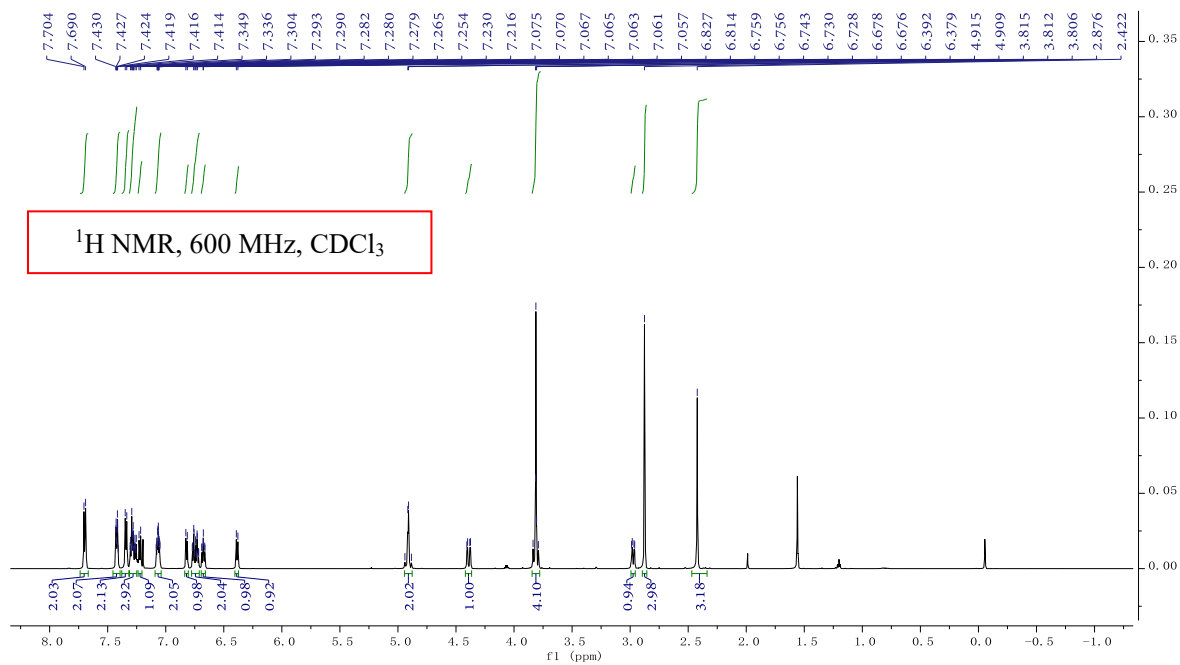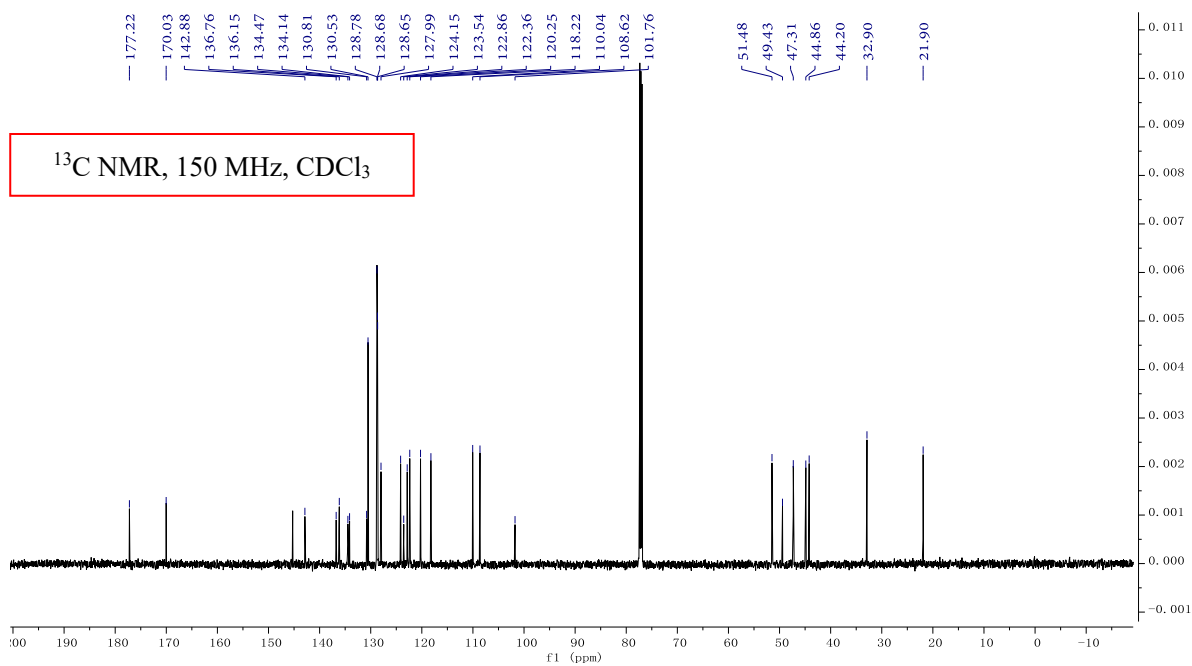

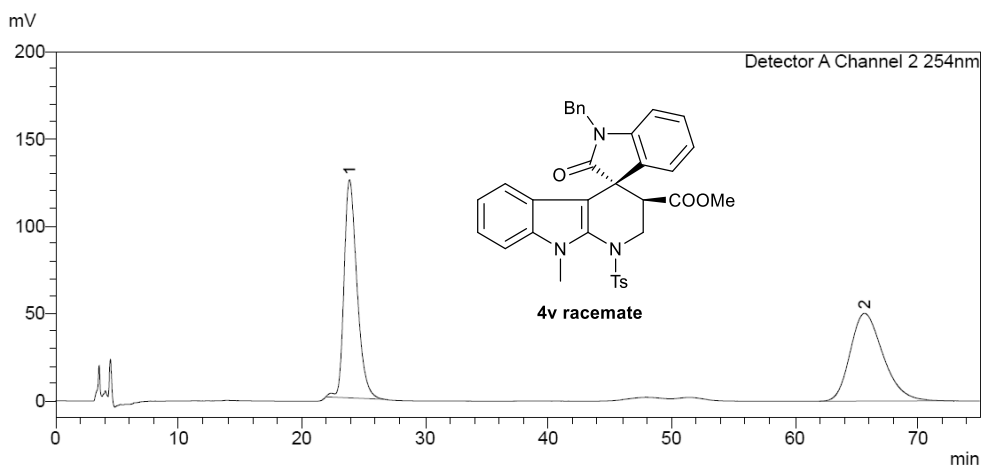

### Peak Analysis Report

Detector A Channel 2 254nm

| No.   | Ret. Time | Height (mAu) | Area (mAu*min) | Rel. Area (%) |
|-------|-----------|--------------|----------------|---------------|
| 1     | 23.881    | 124901       | 9118471        | 49.444        |
| 2     | 65.666    | 50231        | 9323619        | 50.556        |
| Total |           | 175132       | 18442090       | 100.000       |

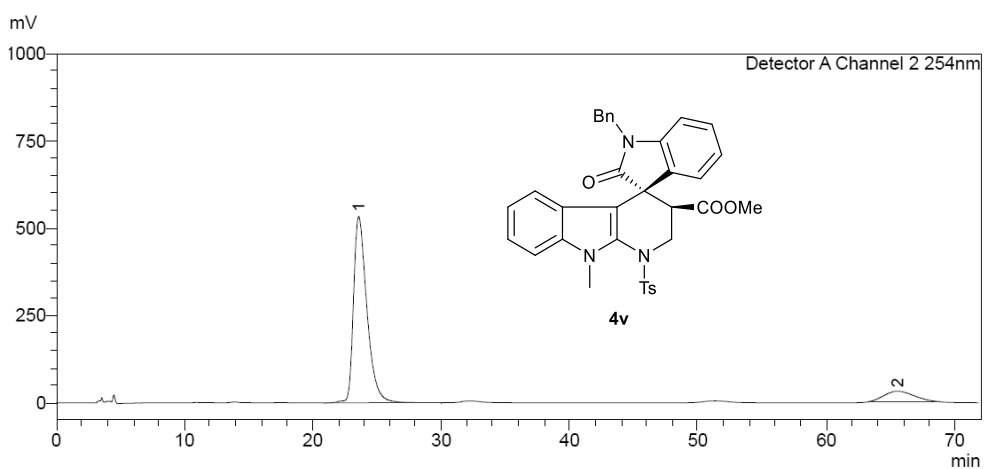

### Peak Analysis Report

Detector A Channel 2 254nm

| No.   | Ret. Time | Height (mAu) | Area (mAu*min) | Rel. Area (%) |
|-------|-----------|--------------|----------------|---------------|
| 1     | 23.574    | 532845       | 38762150       | 93.941        |
| 2     | 65.542    | 20862        | 2500078        | 6.059         |
| Total |           | 553708       | 41262228       | 100.000       |

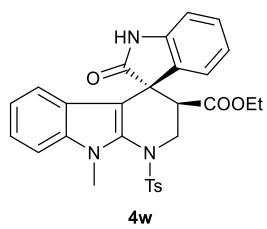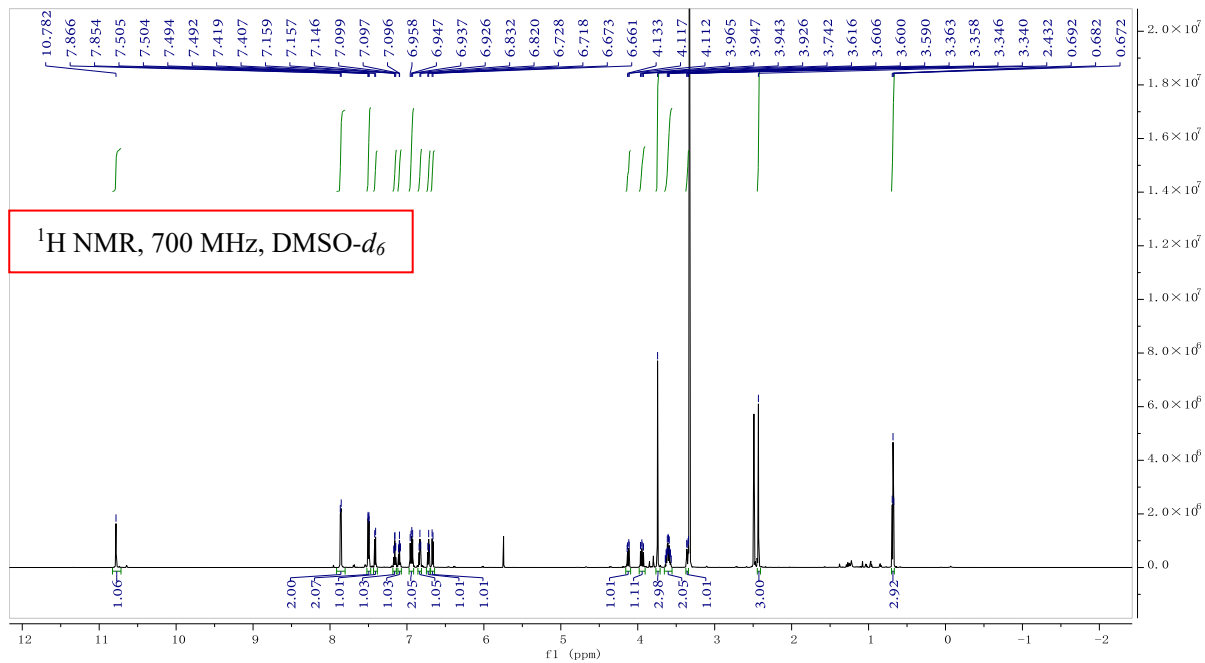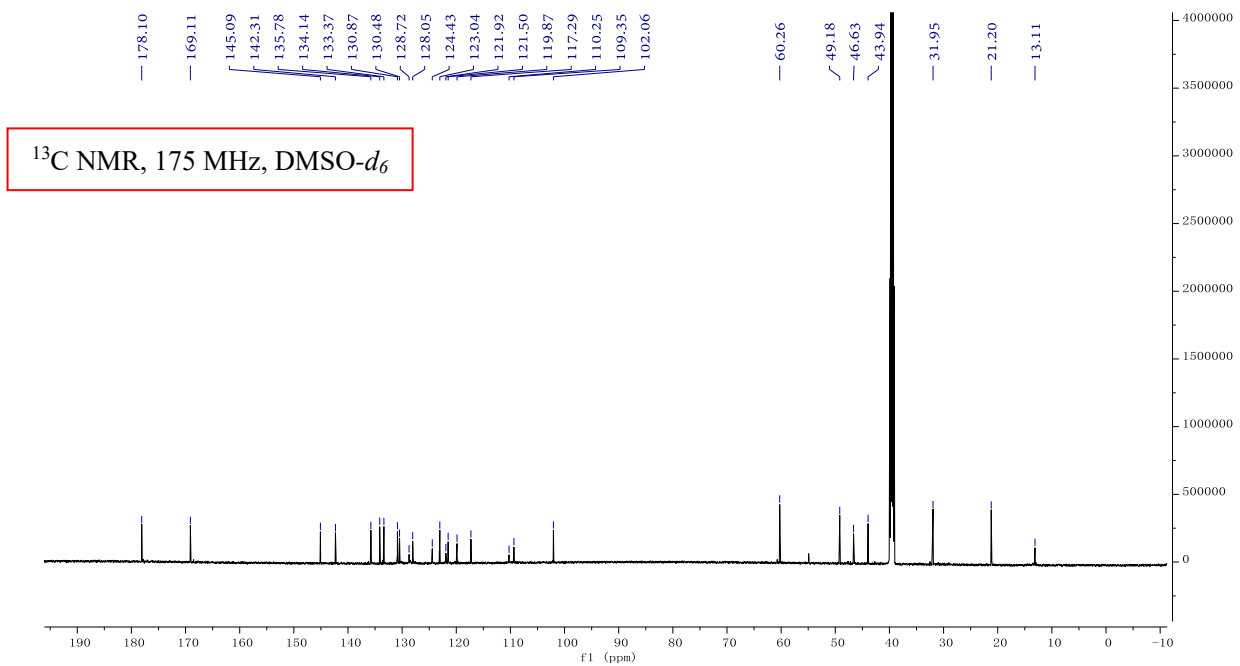

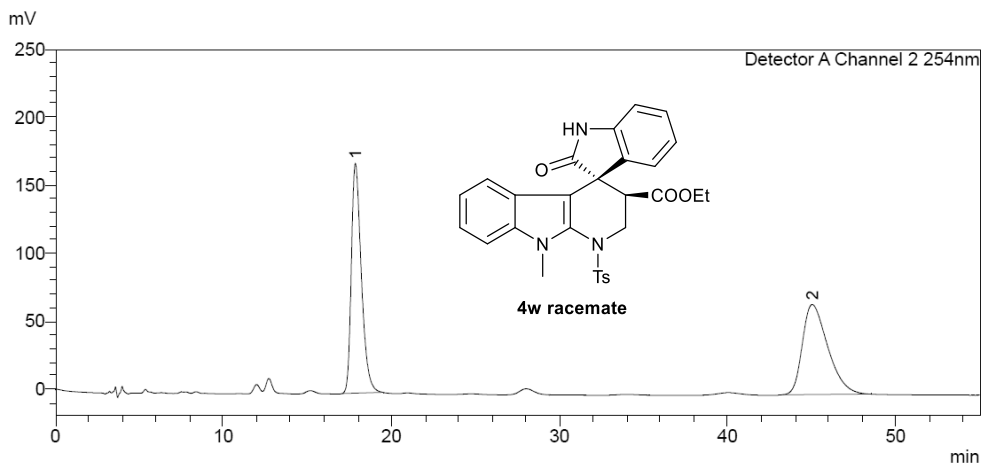

### Peak Analysis Report

Detector A Channel 2 254nm

| No.   | Ret. Time | Height (mAu) | Area (mAu*min) | Rel. Area (%) |
|-------|-----------|--------------|----------------|---------------|
| 1     | 17.860    | 169162       | 6993421        | 50.062        |
| 2     | 45.046    | 66321        | 6976202        | 49.938        |
| Total |           | 235483       | 13969622       | 100.000       |

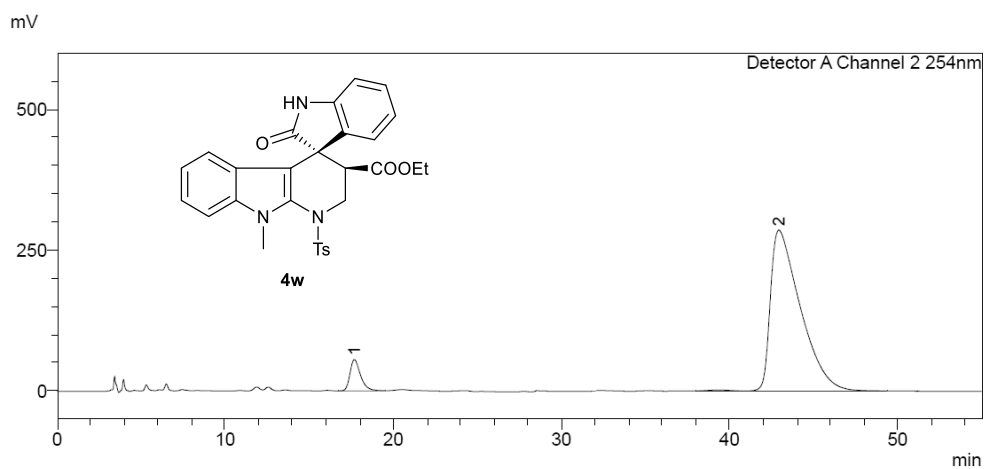

### Peak Analysis Report

Detector A Channel 2 254nm

| No.   | Ret. Time | Height (mAu) | Area (mAu*min) | Rel. Area (%) |
|-------|-----------|--------------|----------------|---------------|
| 1     | 17.688    | 55506        | 2426366        | 6.424         |
| 2     | 42.943    | 285088       | 35341049       | 93.576        |
| Total |           | 340593       | 37767415       | 100.000       |



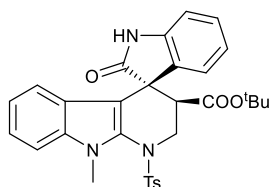

4x

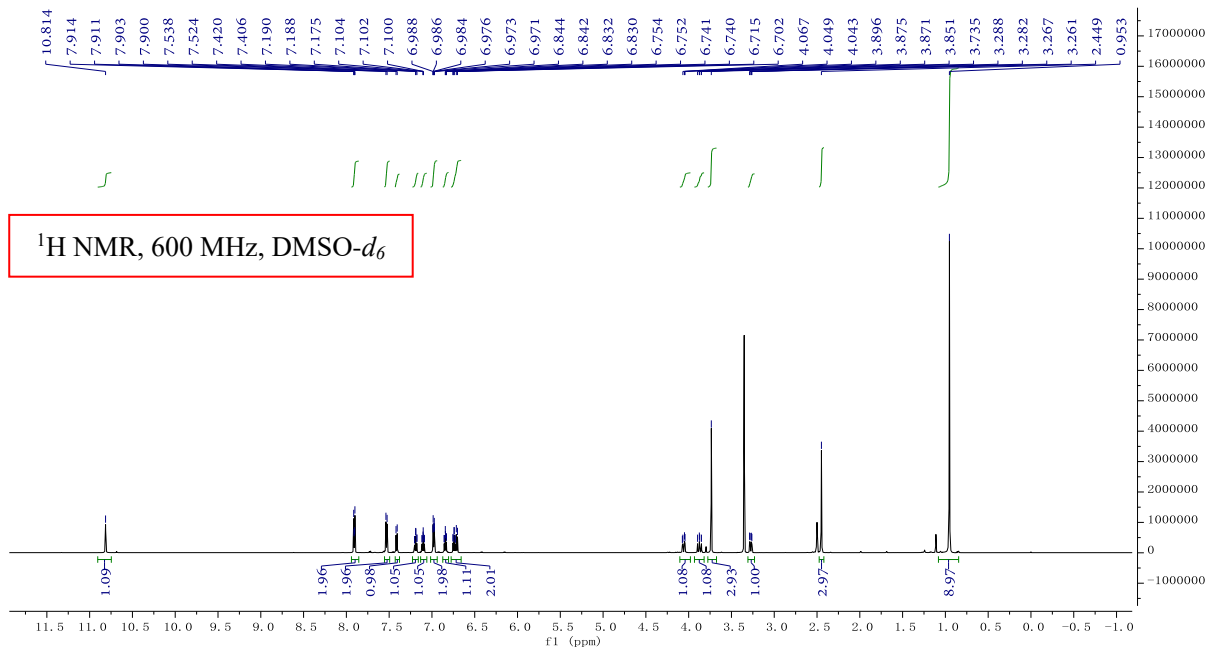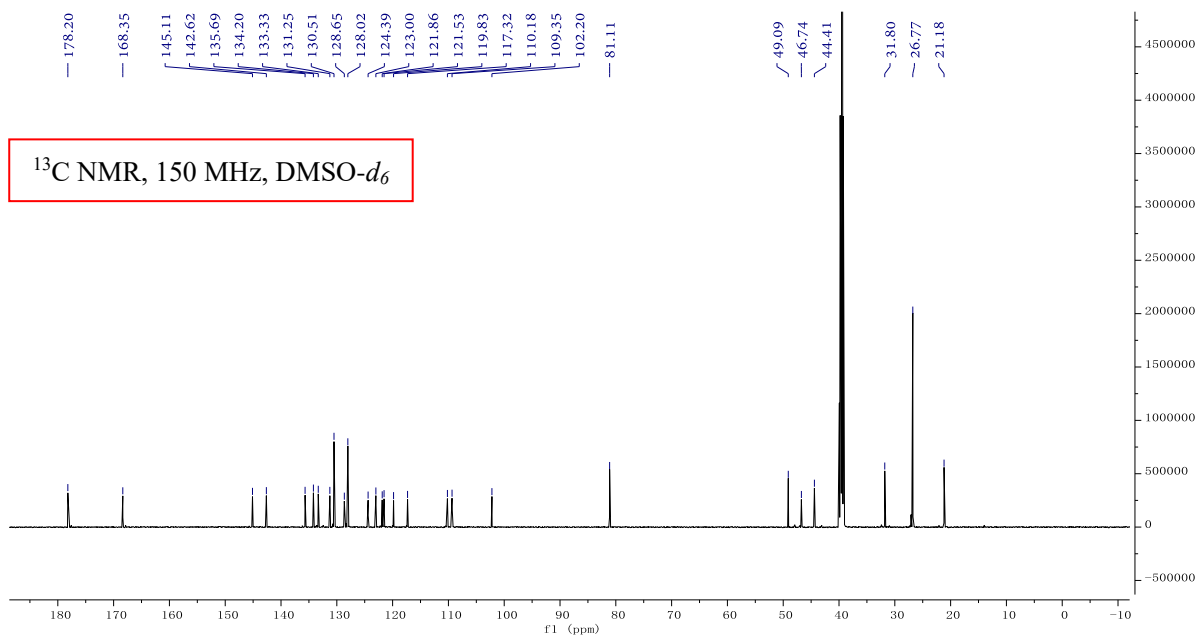

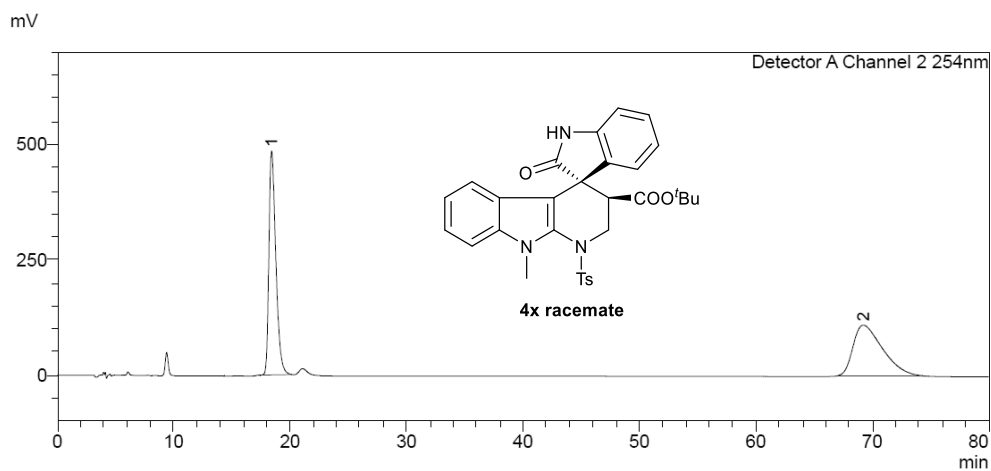

### Peak Analysis Report

Detector A Channel 2 254nm

| No.   | Ret. Time | Height (mAu) | Area (mAu*min) | Rel. Area (%) |
|-------|-----------|--------------|----------------|---------------|
| 1     | 18.419    | 484769       | 20006638       | 50.809        |
| 2     | 69.242    | 109741       | 19369261       | 49.191        |
| Total |           | 594510       | 39375899       | 100.000       |

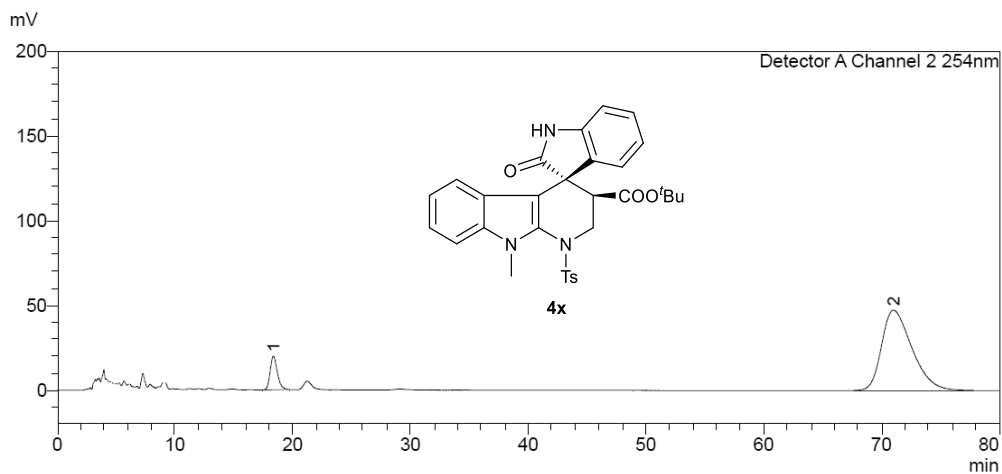

### Peak Analysis Report

Detector A Channel 2 254nm

| No.   | Ret. Time | Height (mAu) | Area (mAu*min) | Rel. Area (%) |
|-------|-----------|--------------|----------------|---------------|
| 1     | 18.366    | 19820        | 836220         | 8.977         |
| 2     | 71.053    | 47364        | 8479333        | 91.023        |
| Total |           | 67183        | 9315553        | 100.000       |

## 5. Experimental procedures and results of bioassays

### Cytotoxicity assay

The cytotoxic effects of synthesized compounds toward colorectal cancer cell lines were determined by the CCK-8 cell proliferation kit. In brief, SW620, SW480 and HCT116 cells were plated in 96-well microplates at a density of  $5 \times 10^3$  cells/well and incubated in a humidified atmosphere with 5% CO<sub>2</sub> at 37°C for 24h. Test compounds were determined in three independently repeated wells, and 0.1% DMSO was used as the control. After 48h of incubation, 10 μL of the CCK-8 solution was added to each well, followed by incubation for another two hours. Subsequently, the absorbance (OD) of each well was measured at 450nm on a Microplate reader. The inhibition ratios or IC<sub>50</sub> values were determined. All experiments were repeated three times independently.

### Apoptosis assay

HCT116 cells ( $1 \times 10^5$  cells per well) were cultured in the six-well plates and exposed to the test compounds at the indicated concentration for 24 hours. The cells were harvested after trypsin digestion and washed twice by cold PBS. After centrifugation for 5 minutes at 2000g, the supernatant was removed and the cells were resuspended in 400 μL binding buffer, combined with 10 μL AnnexinV-FITC staining buffer and 10 μL of PI, and then incubated at room temperature for 15min in dark. The flow cytometry instrument was used to analyze the stained cells.

### Autophagy assay

HCT116 cells were cultured in a six well plate and when the cell fusion rate reached 60-70%, adenovirus containing LC3-EGFP-mCherry plasmid was added for infection. After incubating with adenovirus for four hours, replaced the cells with fresh medium supplemented with 10%(v/v) FBS and cultured for another 48h to ensure the high efficiency of transfection. After transfection, the cells were incubated with 0.2 μmol/L compound 4h for 12h, and the fluorescent spots in the treated cells were then imaged by confocal laser scanning microscope. For the TEM (Transmission electronic microscopy) analysis, HCT116 cells ( $1 \times 10^5$  cells per well) were seeded in six-well plates and treated with or without compound 4h for 12h. Then cells were harvested and fixed 2 hours at room temperature in 2.5% glutaraldehyde in 0.1 mol/L PBS, and then post-fixed in 1% buffered osmiumtetroxide for 2h. Subsequently, specimens were examined under a transmission electronic microscope.

### Western blotting

HCT116 cells were exposed to various concentration of compound 4h and collected after 24 hours. The cells were washed twice with ice cold PBS and scraped off by the cell scraper, incubated with lysis buffer on ice for 20 minutes. Then the lysates were centrifuged at 12,000g at 4°C for 15min. The BCA protein assay reagents were employed to determine the protein concentration in the supernatant. Equal amounts of protein were resolved using SDS-PAGE and transferred to PVDF membrane. The PVDF membranes were blocked with 5% BSA (Dilute with TBST buffer) at room temperature. Then the PVDF membranes were gently rinsed with TBST buffer and incubated with specific primary antibodies against LC3, SQSTM1, caspase-3, Bax, Bcl-2, Cytochrome C, and GAPDH with gentle rotation overnight. Finally, the membranes were incubated with secondary antibodies for one hour at room temperature and then visualized using an ECL (Enhanced chemiluminescence) kit.

**Table S1. Mean inhibitory ratio @1.0  $\mu\text{mol/L}$ .<sup>a</sup>**

| Compd.        | HCT116 | SW620 | SW480 | Compd.    | HCT116 | SW620 | SW480 |
|---------------|--------|-------|-------|-----------|--------|-------|-------|
| <b>4a</b>     | 34.82  | 43.71 | 44.58 | <b>4m</b> | 39.56  | 41.82 | 30.52 |
| <b>4b</b>     | 44.1   | 42.8  | 37.68 | <b>4n</b> | 32.21  | 40.18 | 20.72 |
| <b>4c</b>     | 57.82  | 59.79 | 54.36 | <b>4o</b> | 39.72  | 42.8  | 38.2  |
| <b>4d</b>     | 52.83  | 60.3  | 55.71 | <b>4p</b> | 38.82  | 30.19 | 39.24 |
| <b>4e</b>     | 38.98  | 45.07 | 48.41 | <b>4q</b> | 33.04  | 34.41 | 26.38 |
| <b>4f</b>     | 44.62  | 37.89 | 44.53 | <b>4r</b> | 37.84  | 31.47 | 34.23 |
| <b>4g</b>     | 59.96  | 59.78 | 54.6  | <b>4s</b> | 29.04  | 30.17 | 38.65 |
| <b>4h</b>     | 75.7   | 72.51 | 71.47 | <b>4t</b> | 20.9   | 33.19 | 37.96 |
| <b>ent-4h</b> | 65.64  | 63.67 | 60.37 | <b>4u</b> | 29.77  | 34.42 | 37.54 |
| <b>4i</b>     | 71.45  | 69.56 | 70.22 | <b>4v</b> | 8.16   | 11.59 | 16.71 |
| <b>4j</b>     | 42.93  | 44.17 | 45.39 | <b>4w</b> | 12.21  | 13.41 | 13.65 |
| <b>4k</b>     | 41.87  | 37.73 | 40.59 | <b>4x</b> | 9.6    | 11.24 | 13.68 |
| <b>4l</b>     | 31.98  | 31.86 | 28.04 |           |        |       |       |

<sup>a</sup> Each compound was tested in triplicate; the data are presented as the mean values.

**Table S2. In vitro antiproliferative activities of compound 4h in combination with autophagy inhibitors.<sup>a</sup>**

| Compd.                 | HCT116 cell IC <sub>50</sub> ( $\mu\text{mol/L}$ ) |
|------------------------|----------------------------------------------------|
| <b>4h</b>              | 0.857 $\pm$ 0.43                                   |
| <b>4h + 3-MA</b>       | 0.104 $\pm$ 0.056                                  |
| <b>4h + HCQ</b>        | 0.101 $\pm$ 0.034                                  |
| <b>4h + Wortmannin</b> | 0.026 $\pm$ 0.007                                  |

<sup>a</sup> Each compound was tested in triplicate; the data are presented as the mean values.

Raw images of Western blot

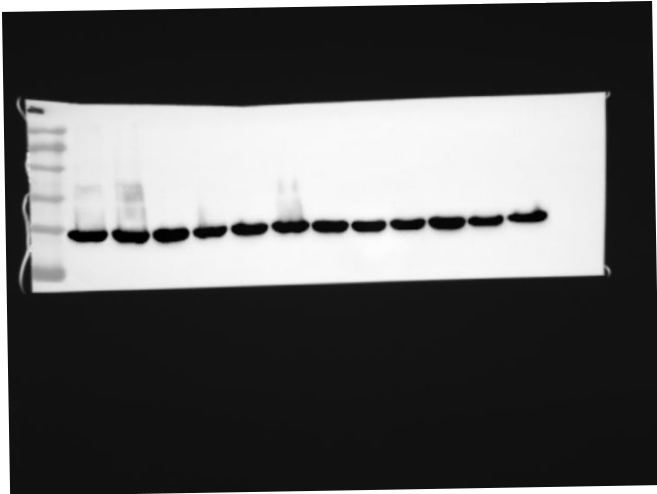

GAPDH

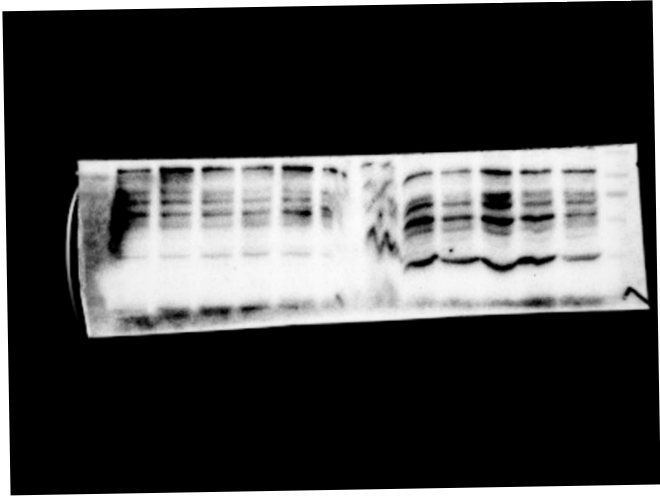

clev\_caspase-3

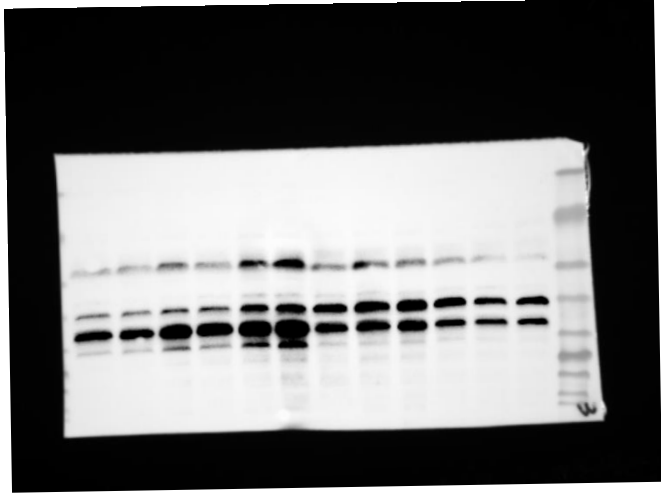

LC3

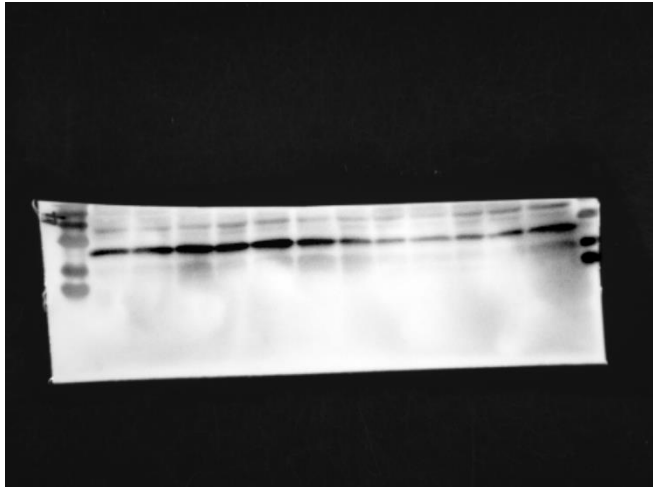

total\_caspase-3

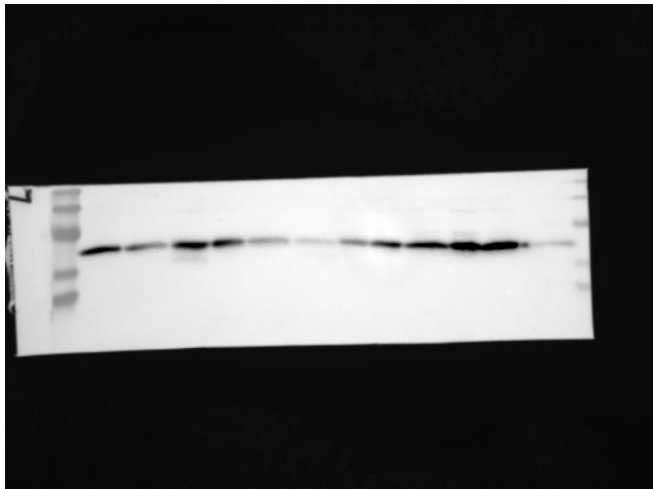

Cyto. C

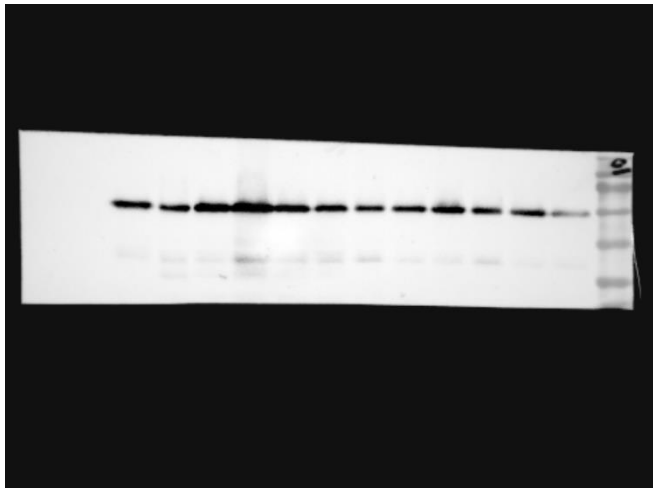

SQSTM1

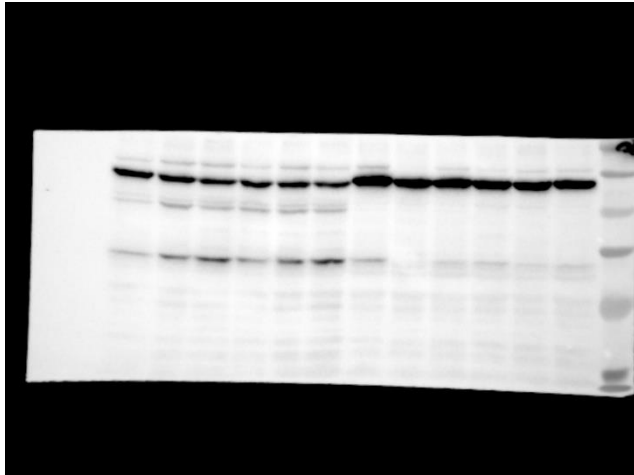

Bcl-2

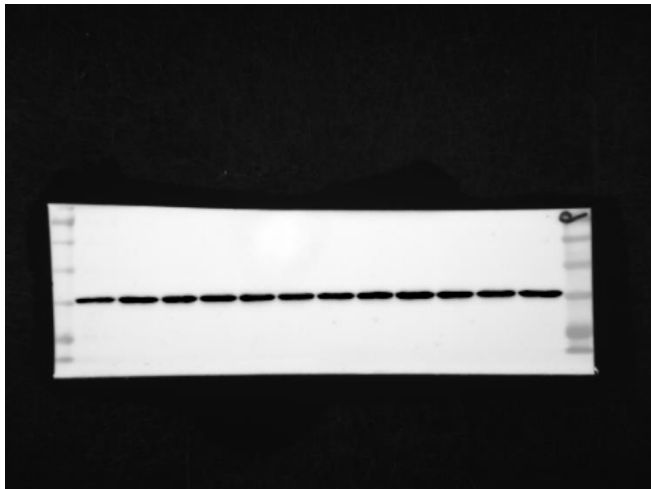

GAPDH
